# Supplementary material
Source: publisher figshare collection journal article supplement (https://acs.figshare.com/ndownloader/files/3012627)
Supplement: Supplementary file 1 [file 3012627]

REMARK Date 2014-11-14 Time 16:47:22 Pacific Standard Time -0800 (1416012442.64 s)
REMARK PHENIX refinement
REMARK 
REMARK ****************** INPUT FILES AND LABELS ******************************
REMARK Reflections:
REMARK   file name      : C:\Users\Owner\Desktop\Noel research\Alkylation\Xray data\140730\RK2-4b\New folder\Refine_2\Jul2014_RK2-4_TEAS_W273E_refine_2.mtz
REMARK   labels         : ['F-obs,SIGF-obs,DANOF-obs,SIGDANOF-obs,ISYMF-obs']
REMARK R-free flags:
REMARK   file name      : C:\Users\Owner\Desktop\Noel research\Alkylation\Xray data\140730\RK2-4b\New folder\Refine_2\Jul2014_RK2-4_TEAS_W273E_refine_2.mtz
REMARK   label          : R-free-flags(+),R-free-flags(-)
REMARK   test_flag_value: 1
REMARK Model file name(s): 
REMARK   C:\Users\Owner\Desktop\Noel research\Alkylation\Xray data\140730\RK2-4b\New folder\Refine_2\Jul2014_RK2-4_TEAS_W273E_refine_2_MG_added.txt
REMARK 
REMARK ******************** REFINEMENT SUMMARY: QUICK FACTS *******************
REMARK Start: r_work = 0.1940 r_free = 0.2269 bonds = 0.008 angles = 1.049
REMARK Final: r_work = 0.1951 r_free = 0.2205 bonds = 0.008 angles = 1.013
REMARK ************************************************************************
REMARK 
REMARK ****************** REFINEMENT STATISTICS STEP BY STEP ******************
REMARK leading digit, like 1_, means number of macro-cycle                     
REMARK 0    : statistics at the very beginning when nothing is done yet        
REMARK 1_bss: bulk solvent correction and/or (anisotropic) scaling             
REMARK 1_xyz: refinement of coordinates                                        
REMARK 1_adp: refinement of ADPs (Atomic Displacement Parameters)              
REMARK 1_wat: ordered solvent update (add / remove)                            
REMARK 1_occ: refinement of occupancies                                        
REMARK ------------------------------------------------------------------------
REMARK  stage       r-work r-free bonds angles b_min b_max b_ave n_water shift
REMARK       0    : 0.4187 0.4074 0.008  1.05  22.5 168.1  46.5 206      0.000
REMARK       1_bss: 0.1940 0.2269 0.008  1.05  22.5 168.1  46.5 206      0.000
REMARK 1_settarget: 0.1940 0.2269 0.008  1.05  22.5 168.1  46.5 206      0.000
REMARK 1_addcbetar: 0.1940 0.2269 0.008  1.05  22.5 168.1  46.5 206      0.000
REMARK    1_weight: 0.1940 0.2269 0.008  1.05  22.5 168.1  46.5 206      0.000
REMARK       1_nqh: 0.1940 0.2269 0.008  1.05  22.5 168.1  46.5 206      0.000
REMARK    1_xyzrec: 0.1898 0.2299 0.008  0.99  22.5 168.1  46.5 206      0.077
REMARK       1_adp: 0.1897 0.2296 0.008  0.99  24.8 163.1  46.9 206      0.077
REMARK       2_bss: 0.1890 0.2288 0.008  0.99  23.0 161.4  45.1 206      0.077
REMARK 2_settarget: 0.1890 0.2288 0.008  0.99  23.0 161.4  45.1 206      0.077
REMARK       2_sol: 0.1907 0.2296 0.008  0.99  21.5 161.4  45.4 248       n/a
REMARK   2_realsrl: 0.1944 0.2317 0.008  1.11  21.5 161.4  45.4 248       n/a
REMARK    2_weight: 0.1944 0.2317 0.008  1.11  21.5 161.4  45.4 248       n/a
REMARK       2_nqh: 0.1945 0.2317 0.008  1.11  21.5 161.4  45.4 248       n/a
REMARK    2_xyzrec: 0.1902 0.2260 0.008  1.05  21.5 161.4  45.4 248       n/a
REMARK       2_adp: 0.1883 0.2245 0.008  1.05  22.3 160.0  45.5 248       n/a
REMARK       3_bss: 0.1878 0.2251 0.008  1.05  22.3 160.0  45.5 248       n/a
REMARK 3_settarget: 0.1878 0.2251 0.008  1.05  22.3 160.0  45.5 248       n/a
REMARK       3_sol: 0.1896 0.2251 0.008  1.05  21.3 160.0  45.6 272       n/a
REMARK   3_realsrl: 0.1925 0.2280 0.008  1.20  21.3 160.0  45.6 272       n/a
REMARK    3_weight: 0.1925 0.2280 0.008  1.20  21.3 160.0  45.6 272       n/a
REMARK       3_nqh: 0.1925 0.2280 0.008  1.20  21.3 160.0  45.6 272       n/a
REMARK    3_xyzrec: 0.1872 0.2238 0.008  1.01  21.3 160.0  45.6 272       n/a
REMARK       3_adp: 0.1870 0.2239 0.008  1.01  22.2 155.0  45.7 272       n/a
REMARK         end: 0.1951 0.2205 0.008  1.01  22.2 155.0  45.6 251       n/a
REMARK ------------------------------------------------------------------------
REMARK MODEL CONTENT.
REMARK  ELEMENT        ATOM RECORD COUNT   OCCUPANCY SUM
REMARK        C                     2775         2775.00
REMARK       Mg                        3            3.00
REMARK        O                     1080         1080.00
REMARK        N                      719          719.00
REMARK        S                       19           19.00
REMARK      O1-                        1            1.00
REMARK    TOTAL                     4597         4597.00
REMARK -----------------------------------------------------------------------
REMARK r_free_flags.md5.hexdigest b6199189f026896ff53023bbbfcb0b0d
REMARK 
REMARK IF THIS FILE IS FOR PDB DEPOSITION: REMOVE ALL FROM THIS LINE UP.
REMARK   3
REMARK   3 REFINEMENT.
REMARK   3   PROGRAM     : PHENIX (phenix.refine: dev_1701)
REMARK   3   AUTHORS     : Adams,Afonine,Burnley,Chen,Davis,Echols,Gildea,
REMARK   3               : Gopal,Gros,Grosse-Kunstleve,Headd,Hung,Immormino,
REMARK   3               : Ioerger,McCoy,McKee,Moriarty,Pai,Read,Richardson,
REMARK   3               : Richardson,Romo,Sacchettini,Sauter,Smith,Storoni,
REMARK   3               : Terwilliger,Zwart
REMARK   3
REMARK   3  REFINEMENT TARGET : ML
REMARK   3  
REMARK   3  DATA USED IN REFINEMENT.
REMARK   3   RESOLUTION RANGE HIGH (ANGSTROMS) : 2.250   
REMARK   3   RESOLUTION RANGE LOW  (ANGSTROMS) : 72.348  
REMARK   3   MIN(FOBS/SIGMA_FOBS)              : 0.03  
REMARK   3   COMPLETENESS FOR RANGE        (%) : 96.13 
REMARK   3   NUMBER OF REFLECTIONS             : 87000     
REMARK   3   NUMBER OF REFLECTIONS (NON-ANOMALOUS) : 46013     
REMARK   3  
REMARK   3  FIT TO DATA USED IN REFINEMENT.
REMARK   3   R VALUE     (WORKING + TEST SET) : 0.1962
REMARK   3   R VALUE            (WORKING SET) : 0.1951
REMARK   3   FREE R VALUE                     : 0.2205
REMARK   3   FREE R VALUE TEST SET SIZE   (%) : 4.38  
REMARK   3   FREE R VALUE TEST SET COUNT      : 3813      
REMARK   3  
REMARK   3  FIT TO DATA USED IN REFINEMENT (IN BINS).
REMARK   3   BIN  RESOLUTION RANGE  COMPL.    NWORK NFREE   RWORK  RFREE
REMARK   3     1 72.3859 -  6.7483    1.00     3203   147  0.1409 0.1820
REMARK   3     2  6.7483 -  5.3568    1.00     3188   151  0.1927 0.2175
REMARK   3     3  5.3568 -  4.6798    1.00     3211   156  0.1555 0.1406
REMARK   3     4  4.6798 -  4.2520    1.00     3178   160  0.1488 0.1720
REMARK   3     5  4.2520 -  3.9473    1.00     3201   132  0.1614 0.1890
REMARK   3     6  3.9473 -  3.7146    1.00     3205   152  0.1617 0.2055
REMARK   3     7  3.7146 -  3.5285    1.00     3228   139  0.1781 0.1991
REMARK   3     8  3.5285 -  3.3749    1.00     3225   142  0.1899 0.2540
REMARK   3     9  3.3749 -  3.2450    1.00     3176   131  0.2066 0.2124
REMARK   3    10  3.2450 -  3.1330    1.00     3242   151  0.1994 0.2626
REMARK   3    11  3.1330 -  3.0351    1.00     3217   144  0.2165 0.2331
REMARK   3    12  3.0351 -  2.9483    1.00     3184   145  0.2191 0.2528
REMARK   3    13  2.9483 -  2.8707    1.00     3202   152  0.2365 0.2667
REMARK   3    14  2.8707 -  2.8006    1.00     3200   123  0.2319 0.2842
REMARK   3    15  2.8006 -  2.7370    1.00     3210   162  0.2266 0.2673
REMARK   3    16  2.7370 -  2.6787    1.00     3161   139  0.2186 0.2120
REMARK   3    17  2.6787 -  2.6251    1.00     3213   152  0.2326 0.2564
REMARK   3    18  2.6251 -  2.5756    1.00     3229   139  0.2380 0.2108
REMARK   3    19  2.5756 -  2.5296    1.00     3170   155  0.2484 0.2520
REMARK   3    20  2.5296 -  2.4867    1.00     3174   152  0.2587 0.2882
REMARK   3    21  2.4867 -  2.4466    0.98     3148   141  0.2565 0.2469
REMARK   3    22  2.4466 -  2.4090    0.83     2658   113  0.2599 0.2952
REMARK   3    23  2.4090 -  2.3735    0.84     2662   146  0.2620 0.2827
REMARK   3    24  2.3735 -  2.3401    0.83     2686   106  0.2774 0.2793
REMARK   3    25  2.3401 -  2.3085    0.83     2658   141  0.2858 0.3797
REMARK   3    26  2.3085 -  2.2785    0.84     2702   117  0.3036 0.3299
REMARK   3    27  2.2785 -  2.2500    0.84     2656   125  0.3130 0.3591
REMARK   3  
REMARK   3  BULK SOLVENT MODELLING.
REMARK   3   METHOD USED        : FLAT BULK SOLVENT MODEL
REMARK   3   SOLVENT RADIUS     : 1.11    
REMARK   3   SHRINKAGE RADIUS   : 0.90    
REMARK   3   GRID STEP FACTOR   : 4.00    
REMARK   3  
REMARK   3  ERROR ESTIMATES.
REMARK   3   COORDINATE ERROR (MAXIMUM-LIKELIHOOD BASED)     : 0.25    
REMARK   3   PHASE ERROR (DEGREES, MAXIMUM-LIKELIHOOD BASED) : 25.88   
REMARK   3  
REMARK   3  STRUCTURE FACTORS CALCULATION ALGORITHM : FFT
REMARK   3  
REMARK   3  DEVIATIONS FROM IDEAL VALUES.
REMARK   3                 RMSD     MAX  COUNT
REMARK   3   BOND      :  0.008   0.075   4435
REMARK   3   ANGLE     :  1.013  10.408   6013
REMARK   3   CHIRALITY :  0.038   0.174    680
REMARK   3   PLANARITY :  0.004   0.038    766
REMARK   3   DIHEDRAL  : 14.273  89.729   1644
REMARK   3   MIN NONBONDED DISTANCE : 1.870 
REMARK   3  
REMARK   3  MOLPROBITY STATISTICS.
REMARK   3   ALL-ATOM CLASHSCORE : 5.09  
REMARK   3   RAMACHANDRAN PLOT:
REMARK   3     OUTLIERS : 0.56  %
REMARK   3     ALLOWED  : 2.43  %
REMARK   3     FAVORED  : 97.00 %
REMARK   3   ROTAMER OUTLIERS : 0.83 %
REMARK   3   CBETA DEVIATIONS : 0
REMARK   3  
REMARK   3  ATOMIC DISPLACEMENT PARAMETERS.
REMARK   3   WILSON B : None
REMARK   3   RMS(B_ISO_OR_EQUIVALENT_BONDED) : 3.58
REMARK   3   ATOMS          NUMBER OF ATOMS
REMARK   3                    ISO.  ANISO. 
REMARK   3    ALL         :   4597       0
REMARK   3    ALL (NO H)  :   4597       0
REMARK   3    SOLVENT     :    251       0
REMARK   3    NON-SOLVENT :   4346       0
REMARK   3    HYDROGENS   :      0       0
REMARK   3
CRYST1  126.290  126.290  123.420  90.00  90.00  90.00 P 41 21 2
SCALE1      0.007918  0.000000  0.000000        0.00000
SCALE2      0.000000  0.007918  0.000000        0.00000
SCALE3      0.000000  0.000000  0.008102        0.00000
ATOM      1  O   ILE A  13      91.232   1.679  55.242  1.00140.21           O
ATOM      2  N   ILE A  13      93.686   0.046  54.969  1.00153.57           N
ATOM      3  CA  ILE A  13      93.628   1.497  55.061  1.00152.79           C
ATOM      4  C   ILE A  13      92.326   1.917  55.751  1.00146.01           C
ATOM      5  CB  ILE A  13      93.773   2.145  53.649  1.00153.10           C
ATOM      6  CG1 ILE A  13      93.859   3.672  53.741  1.00155.02           C
ATOM      7  CG2 ILE A  13      92.700   1.640  52.674  1.00141.23           C
ATOM      8  CD1 ILE A  13      95.138   4.180  54.382  1.00153.63           C
ATOM      9  O   VAL A  14      91.411   5.112  56.956  1.00132.23           O
ATOM     10  N   VAL A  14      92.442   2.503  56.940  1.00143.62           N
ATOM     11  CA  VAL A  14      91.250   2.836  57.721  1.00138.32           C
ATOM     12  C   VAL A  14      90.676   4.173  57.263  1.00131.67           C
ATOM     13  CB  VAL A  14      91.534   2.861  59.255  1.00141.42           C
ATOM     14  CG1 VAL A  14      92.350   4.077  59.654  1.00145.41           C
ATOM     15  CG2 VAL A  14      90.228   2.819  60.043  1.00141.59           C
ATOM     16  O   ARG A  15      87.712   5.573  58.883  1.00114.97           O
ATOM     17  N   ARG A  15      89.350   4.232  57.193  1.00124.71           N
ATOM     18  CA  ARG A  15      88.637   5.396  56.682  1.00114.13           C
ATOM     19  C   ARG A  15      87.971   6.156  57.830  1.00113.77           C
ATOM     20  CB  ARG A  15      87.587   4.956  55.653  1.00101.89           C
ATOM     21  CG  ARG A  15      88.132   4.149  54.476  1.00 93.55           C
ATOM     22  CD  ARG A  15      88.847   5.038  53.471  1.00 90.92           C
ATOM     23  NE  ARG A  15      88.775   4.508  52.111  1.00 84.14           N
ATOM     24  CZ  ARG A  15      89.827   4.325  51.320  1.00 85.42           C
ATOM     25  NH1 ARG A  15      91.041   4.633  51.748  1.00 91.88           N
ATOM     26  NH2 ARG A  15      89.665   3.838  50.097  1.00 77.85           N
ATOM     27  O   PRO A  16      85.005   7.585  57.263  1.00110.48           O
ATOM     28  N   PRO A  16      87.700   7.463  57.641  1.00111.02           N
ATOM     29  CA  PRO A  16      86.857   8.170  58.614  1.00107.39           C
ATOM     30  C   PRO A  16      85.406   7.735  58.415  1.00110.52           C
ATOM     31  CB  PRO A  16      87.067   9.646  58.261  1.00 99.96           C
ATOM     32  CG  PRO A  16      87.403   9.633  56.805  1.00 98.49           C
ATOM     33  CD  PRO A  16      88.150   8.346  56.547  1.00102.29           C
ATOM     34  O   VAL A  17      82.242   9.017  59.833  1.00110.56           O
ATOM     35  N   VAL A  17      84.642   7.508  59.480  1.00113.54           N
ATOM     36  CA  VAL A  17      83.321   6.908  59.306  1.00115.72           C
ATOM     37  C   VAL A  17      82.217   7.972  59.170  1.00112.70           C
ATOM     38  CB  VAL A  17      82.999   5.908  60.464  1.00115.67           C
ATOM     39  CG1 VAL A  17      82.506   6.629  61.706  1.00114.13           C
ATOM     40  CG2 VAL A  17      81.996   4.846  59.992  1.00110.97           C
ATOM     41  O   ALA A  18      78.928   8.475  59.831  1.00108.16           O
ATOM     42  N   ALA A  18      81.266   7.694  58.277  1.00112.90           N
ATOM     43  CA  ALA A  18      80.260   8.670  57.833  1.00111.58           C
ATOM     44  C   ALA A  18      79.385   9.219  58.961  1.00110.75           C
ATOM     45  CB  ALA A  18      79.381   8.046  56.743  1.00 96.54           C
ATOM     46  O   ASP A  19      76.784  13.010  60.081  1.00 99.46           O
ATOM     47  N   ASP A  19      79.150  10.528  58.928  1.00105.12           N
ATOM     48  CA  ASP A  19      78.377  11.201  59.967  1.00104.48           C
ATOM     49  C   ASP A  19      77.388  12.208  59.368  1.00102.07           C
ATOM     50  CB  ASP A  19      79.320  11.903  60.952  1.00104.71           C
ATOM     51  CG  ASP A  19      78.632  12.290  62.246  1.00109.31           C
ATOM     52  OD1 ASP A  19      77.478  11.858  62.463  1.00109.19           O
ATOM     53  OD2 ASP A  19      79.245  13.032  63.044  1.00108.46           O
ATOM     54  O   PHE A  20      74.754  11.167  57.424  1.00 87.11           O
ATOM     55  N   PHE A  20      77.231  12.168  58.049  1.00 98.21           N
ATOM     56  CA  PHE A  20      76.273  13.042  57.383  1.00 90.19           C
ATOM     57  C   PHE A  20      74.886  12.398  57.469  1.00 92.48           C
ATOM     58  CB  PHE A  20      76.688  13.318  55.925  1.00 83.94           C
ATOM     59  CG  PHE A  20      78.069  13.943  55.781  1.00 88.36           C
ATOM     60  CD1 PHE A  20      78.681  14.588  56.855  1.00 89.97           C
ATOM     61  CD2 PHE A  20      78.755  13.883  54.573  1.00 81.22           C
ATOM     62  CE1 PHE A  20      79.949  15.155  56.722  1.00 91.45           C
ATOM     63  CE2 PHE A  20      80.014  14.454  54.428  1.00 78.93           C
ATOM     64  CZ  PHE A  20      80.613  15.087  55.507  1.00 87.20           C
ATOM     65  N   SER A  21      73.861  13.234  57.624  1.00 89.76           N
ATOM     66  CA  SER A  21      72.491  12.756  57.817  1.00 84.21           C
ATOM     67  C   SER A  21      71.982  11.990  56.592  1.00 81.05           C
ATOM     68  O   SER A  21      72.300  12.351  55.455  1.00 77.21           O
ATOM     69  CB  SER A  21      71.555  13.933  58.119  1.00 86.43           C
ATOM     70  OG  SER A  21      72.053  14.740  59.175  1.00 94.53           O
ATOM     71  N   PRO A  22      71.199  10.918  56.819  1.00 80.63           N
ATOM     72  CA  PRO A  22      70.529  10.302  55.668  1.00 74.25           C
ATOM     73  C   PRO A  22      69.405  11.210  55.160  1.00 70.00           C
ATOM     74  O   PRO A  22      69.047  12.192  55.823  1.00 65.43           O
ATOM     75  CB  PRO A  22      69.983   8.982  56.231  1.00 68.72           C
ATOM     76  CG  PRO A  22      69.840   9.225  57.693  1.00 71.69           C
ATOM     77  CD  PRO A  22      70.933  10.192  58.075  1.00 79.01           C
ATOM     78  N   SER A  23      68.870  10.888  53.989  1.00 67.63           N
ATOM     79  CA  SER A  23      67.821  11.684  53.376  1.00 55.64           C
ATOM     80  C   SER A  23      66.540  11.692  54.219  1.00 60.76           C
ATOM     81  O   SER A  23      65.965  10.634  54.532  1.00 55.38           O
ATOM     82  CB  SER A  23      67.528  11.166  51.965  1.00 55.23           C
ATOM     83  OG  SER A  23      66.467  11.883  51.357  1.00 55.90           O
ATOM     84  N   LEU A  24      66.122  12.904  54.586  1.00 54.40           N
ATOM     85  CA  LEU A  24      64.864  13.165  55.280  1.00 53.63           C
ATOM     86  C   LEU A  24      63.663  12.598  54.531  1.00 53.32           C
ATOM     87  O   LEU A  24      62.651  12.237  55.128  1.00 58.01           O
ATOM     88  CB  LEU A  24      64.660  14.679  55.446  1.00 56.70           C
ATOM     89  CG  LEU A  24      65.648  15.519  56.255  1.00 63.56           C
ATOM     90  CD1 LEU A  24      65.499  17.013  55.935  1.00 57.70           C
ATOM     91  CD2 LEU A  24      65.453  15.260  57.743  1.00 63.01           C
ATOM     92  N   TRP A  25      63.794  12.525  53.214  1.00 51.68           N
ATOM     93  CA  TRP A  25      62.648  12.448  52.326  1.00 48.84           C
ATOM     94  C   TRP A  25      62.190  11.036  52.002  1.00 47.56           C
ATOM     95  O   TRP A  25      61.054  10.843  51.571  1.00 50.72           O
ATOM     96  CB  TRP A  25      62.977  13.208  51.039  1.00 46.20           C
ATOM     97  CG  TRP A  25      63.481  14.582  51.354  1.00 48.89           C
ATOM     98  CD1 TRP A  25      64.777  15.017  51.319  1.00 44.37           C
ATOM     99  CD2 TRP A  25      62.698  15.690  51.809  1.00 46.34           C
ATOM    100  NE1 TRP A  25      64.843  16.335  51.708  1.00 45.94           N
ATOM    101  CE2 TRP A  25      63.580  16.770  52.015  1.00 47.74           C
ATOM    102  CE3 TRP A  25      61.335  15.874  52.055  1.00 46.56           C
ATOM    103  CZ2 TRP A  25      63.141  18.015  52.450  1.00 44.72           C
ATOM    104  CZ3 TRP A  25      60.902  17.112  52.487  1.00 45.58           C
ATOM    105  CH2 TRP A  25      61.802  18.166  52.681  1.00 45.17           C
ATOM    106  N   GLY A  26      63.054  10.052  52.220  1.00 48.52           N
ATOM    107  CA  GLY A  26      62.727   8.685  51.855  1.00 46.55           C
ATOM    108  C   GLY A  26      62.416   8.592  50.372  1.00 49.62           C
ATOM    109  O   GLY A  26      63.123   9.167  49.546  1.00 51.52           O
ATOM    110  N   ASP A  27      61.341   7.894  50.028  1.00 47.81           N
ATOM    111  CA  ASP A  27      60.988   7.716  48.626  1.00 44.84           C
ATOM    112  C   ASP A  27      59.742   8.503  48.250  1.00 40.62           C
ATOM    113  O   ASP A  27      59.141   8.250  47.203  1.00 40.03           O
ATOM    114  CB  ASP A  27      60.777   6.225  48.303  1.00 55.17           C
ATOM    115  CG  ASP A  27      62.087   5.415  48.326  1.00 67.45           C
ATOM    116  OD1 ASP A  27      63.190   6.021  48.336  1.00 57.56           O
ATOM    117  OD2 ASP A  27      62.006   4.160  48.316  1.00 76.69           O
ATOM    118  N   GLN A  28      59.361   9.472  49.082  1.00 41.91           N
ATOM    119  CA  GLN A  28      58.104  10.192  48.859  1.00 41.71           C
ATOM    120  C   GLN A  28      58.067  10.932  47.513  1.00 40.86           C
ATOM    121  O   GLN A  28      56.997  11.253  47.014  1.00 40.72           O
ATOM    122  CB  GLN A  28      57.825  11.162  50.011  1.00 40.53           C
ATOM    123  CG  GLN A  28      58.701  12.394  50.084  1.00 40.57           C
ATOM    124  CD  GLN A  28      58.365  13.262  51.287  1.00 44.16           C
ATOM    125  OE1 GLN A  28      58.933  13.092  52.371  1.00 47.19           O
ATOM    126  NE2 GLN A  28      57.433  14.195  51.105  1.00 39.34           N
ATOM    127  N   PHE A  29      59.226  11.159  46.900  1.00 41.23           N
ATOM    128  CA  PHE A  29      59.250  11.844  45.609  1.00 41.68           C
ATOM    129  C   PHE A  29      59.395  10.911  44.415  1.00 46.28           C
ATOM    130  O   PHE A  29      59.196  11.340  43.276  1.00 43.07           O
ATOM    131  CB  PHE A  29      60.382  12.870  45.576  1.00 35.83           C
ATOM    132  CG  PHE A  29      60.208  13.987  46.564  1.00 38.66           C
ATOM    133  CD1 PHE A  29      59.188  14.911  46.410  1.00 34.53           C
ATOM    134  CD2 PHE A  29      61.050  14.099  47.660  1.00 36.68           C
ATOM    135  CE1 PHE A  29      59.022  15.941  47.325  1.00 37.95           C
ATOM    136  CE2 PHE A  29      60.890  15.125  48.577  1.00 40.31           C
ATOM    137  CZ  PHE A  29      59.879  16.049  48.409  1.00 37.49           C
ATOM    138  N   LEU A  30      59.730   9.646  44.685  1.00 46.80           N
ATOM    139  CA  LEU A  30      60.112   8.672  43.655  1.00 45.94           C
ATOM    140  C   LEU A  30      59.131   8.523  42.492  1.00 49.99           C
ATOM    141  O   LEU A  30      59.545   8.362  41.342  1.00 52.31           O
ATOM    142  CB  LEU A  30      60.327   7.296  44.296  1.00 50.47           C
ATOM    143  CG  LEU A  30      60.900   6.209  43.383  1.00 58.56           C
ATOM    144  CD1 LEU A  30      62.128   6.723  42.609  1.00 49.52           C
ATOM    145  CD2 LEU A  30      61.259   4.969  44.201  1.00 60.64           C
ATOM    146  N   SER A  31      57.834   8.548  42.777  1.00 48.05           N
ATOM    147  CA  SER A  31      56.872   8.437  41.693  1.00 48.84           C
ATOM    148  C   SER A  31      55.782   9.478  41.826  1.00 52.22           C
ATOM    149  O   SER A  31      55.098   9.565  42.839  1.00 57.17           O
ATOM    150  CB  SER A  31      56.260   7.035  41.640  1.00 58.00           C
ATOM    151  OG  SER A  31      55.570   6.728  42.837  1.00 60.73           O
ATOM    152  N   PHE A  32      55.640  10.286  40.790  1.00 47.70           N
ATOM    153  CA  PHE A  32      54.551  11.216  40.732  1.00 47.35           C
ATOM    154  C   PHE A  32      53.812  10.973  39.438  1.00 54.18           C
ATOM    155  O   PHE A  32      54.406  10.982  38.352  1.00 50.04           O
ATOM    156  CB  PHE A  32      55.024  12.671  40.825  1.00 45.79           C
ATOM    157  CG  PHE A  32      53.935  13.666  40.546  1.00 45.75           C
ATOM    158  CD1 PHE A  32      52.859  13.793  41.413  1.00 46.27           C
ATOM    159  CD2 PHE A  32      53.968  14.447  39.403  1.00 43.10           C
ATOM    160  CE1 PHE A  32      51.846  14.687  41.153  1.00 46.48           C
ATOM    161  CE2 PHE A  32      52.960  15.346  39.139  1.00 41.41           C
ATOM    162  CZ  PHE A  32      51.895  15.466  40.015  1.00 45.60           C
ATOM    163  N   SER A  33      52.507  10.758  39.574  1.00 55.82           N
ATOM    164  CA  SER A  33      51.637  10.515  38.440  1.00 57.56           C
ATOM    165  C   SER A  33      50.681  11.697  38.279  1.00 55.29           C
ATOM    166  O   SER A  33      49.753  11.880  39.073  1.00 55.18           O
ATOM    167  CB  SER A  33      50.875   9.198  38.627  1.00 59.47           C
ATOM    168  OG  SER A  33      50.545   8.619  37.378  1.00 69.11           O
ATOM    169  N   ILE A  34      50.930  12.501  37.249  1.00 55.62           N
ATOM    170  CA  ILE A  34      50.158  13.714  37.003  1.00 60.00           C
ATOM    171  C   ILE A  34      48.693  13.403  36.639  1.00 61.45           C
ATOM    172  O   ILE A  34      48.406  12.522  35.825  1.00 61.20           O
ATOM    173  CB  ILE A  34      50.832  14.569  35.886  1.00 55.34           C
ATOM    174  CG1 ILE A  34      50.190  15.950  35.790  1.00 59.46           C
ATOM    175  CG2 ILE A  34      50.802  13.861  34.537  1.00 54.95           C
ATOM    176  CD1 ILE A  34      50.816  16.829  34.726  1.00 51.60           C
ATOM    177  N   LYS A  35      47.764  14.108  37.279  1.00 64.42           N
ATOM    178  CA  LYS A  35      46.350  14.003  36.927  1.00 60.49           C
ATOM    179  C   LYS A  35      46.070  14.909  35.732  1.00 59.63           C
ATOM    180  O   LYS A  35      45.834  16.106  35.904  1.00 56.32           O
ATOM    181  CB  LYS A  35      45.455  14.392  38.106  1.00 61.59           C
ATOM    182  CG  LYS A  35      45.655  13.577  39.372  1.00 62.26           C
ATOM    183  CD  LYS A  35      44.841  14.154  40.528  1.00 64.85           C
ATOM    184  CE  LYS A  35      45.065  13.371  41.819  1.00 71.90           C
ATOM    185  NZ  LYS A  35      44.442  14.050  42.993  1.00 79.43           N
ATOM    186  N   ASN A  36      46.101  14.337  34.531  1.00 58.30           N
ATOM    187  CA  ASN A  36      45.954  15.108  33.296  1.00 60.28           C
ATOM    188  C   ASN A  36      44.670  15.920  33.196  1.00 62.24           C
ATOM    189  O   ASN A  36      44.644  16.977  32.562  1.00 63.00           O
ATOM    190  CB  ASN A  36      46.035  14.184  32.090  1.00 66.97           C
ATOM    191  CG  ASN A  36      47.448  13.985  31.616  1.00 73.12           C
ATOM    192  OD1 ASN A  36      48.375  13.927  32.422  1.00 75.08           O
ATOM    193  ND2 ASN A  36      47.630  13.902  30.301  1.00 76.59           N
ATOM    194  N   GLN A  37      43.603  15.410  33.798  1.00 60.61           N
ATOM    195  CA  GLN A  37      42.328  16.106  33.806  1.00 59.97           C
ATOM    196  C   GLN A  37      42.526  17.451  34.482  1.00 55.41           C
ATOM    197  O   GLN A  37      42.158  18.495  33.940  1.00 52.78           O
ATOM    198  CB  GLN A  37      41.243  15.297  34.535  1.00 60.77           C
ATOM    199  CG  GLN A  37      41.393  13.775  34.468  1.00 70.99           C
ATOM    200  CD  GLN A  37      42.509  13.225  35.363  1.00 70.72           C
ATOM    201  OE1 GLN A  37      42.570  13.519  36.563  1.00 65.88           O
ATOM    202  NE2 GLN A  37      43.401  12.428  34.772  1.00 72.98           N
ATOM    203  O   VAL A  38      44.100  20.726  35.532  1.00 48.54           O
ATOM    204  N   VAL A  38      43.125  17.409  35.669  1.00 54.33           N
ATOM    205  CA  VAL A  38      43.416  18.617  36.429  1.00 54.89           C
ATOM    206  C   VAL A  38      44.359  19.537  35.661  1.00 50.68           C
ATOM    207  CB  VAL A  38      44.034  18.277  37.794  1.00 54.89           C
ATOM    208  CG1 VAL A  38      44.048  19.504  38.685  1.00 49.98           C
ATOM    209  CG2 VAL A  38      43.254  17.150  38.455  1.00 52.62           C
ATOM    210  N   ALA A  39      45.443  18.968  35.137  1.00 53.80           N
ATOM    211  CA  ALA A  39      46.466  19.735  34.429  1.00 50.08           C
ATOM    212  C   ALA A  39      45.911  20.489  33.228  1.00 50.07           C
ATOM    213  O   ALA A  39      46.241  21.656  33.012  1.00 46.24           O
ATOM    214  CB  ALA A  39      47.594  18.817  33.987  1.00 49.45           C
ATOM    215  N   GLU A  40      45.069  19.821  32.445  1.00 51.35           N
ATOM    216  CA  GLU A  40      44.549  20.419  31.219  1.00 51.52           C
ATOM    217  C   GLU A  40      43.475  21.437  31.538  1.00 48.11           C
ATOM    218  O   GLU A  40      43.310  22.428  30.818  1.00 51.29           O
ATOM    219  CB  GLU A  40      44.015  19.339  30.274  1.00 58.47           C
ATOM    220  CG  GLU A  40      45.125  18.445  29.728  1.00 65.09           C
ATOM    221  CD  GLU A  40      44.624  17.346  28.807  1.00 74.97           C
ATOM    222  OE1 GLU A  40      43.395  17.259  28.591  1.00 77.07           O
ATOM    223  OE2 GLU A  40      45.467  16.569  28.301  1.00 76.51           O
ATOM    224  N   LYS A  41      42.756  21.198  32.631  1.00 50.12           N
ATOM    225  CA  LYS A  41      41.772  22.148  33.126  1.00 45.83           C
ATOM    226  C   LYS A  41      42.455  23.425  33.608  1.00 45.48           C
ATOM    227  O   LYS A  41      42.047  24.533  33.247  1.00 43.47           O
ATOM    228  CB  LYS A  41      40.958  21.546  34.264  1.00 44.74           C
ATOM    229  CG  LYS A  41      40.050  22.561  34.930  1.00 52.48           C
ATOM    230  CD  LYS A  41      39.749  22.209  36.382  1.00 60.32           C
ATOM    231  CE  LYS A  41      38.902  23.298  37.056  1.00 66.07           C
ATOM    232  NZ  LYS A  41      37.533  23.428  36.457  1.00 52.99           N
ATOM    233  N   TYR A  42      43.480  23.265  34.445  1.00 44.52           N
ATOM    234  CA  TYR A  42      44.244  24.413  34.928  1.00 44.90           C
ATOM    235  C   TYR A  42      44.781  25.217  33.761  1.00 41.53           C
ATOM    236  O   TYR A  42      44.629  26.442  33.716  1.00 40.73           O
ATOM    237  CB  TYR A  42      45.397  23.984  35.833  1.00 41.75           C
ATOM    238  CG  TYR A  42      44.988  23.621  37.243  1.00 47.58           C
ATOM    239  CD1 TYR A  42      43.654  23.398  37.576  1.00 48.80           C
ATOM    240  CD2 TYR A  42      45.938  23.510  38.248  1.00 48.76           C
ATOM    241  CE1 TYR A  42      43.284  23.068  38.877  1.00 48.90           C
ATOM    242  CE2 TYR A  42      45.578  23.174  39.547  1.00 48.99           C
ATOM    243  CZ  TYR A  42      44.256  22.961  39.855  1.00 53.45           C
ATOM    244  OH  TYR A  42      43.916  22.635  41.147  1.00 59.40           O
ATOM    245  N   ALA A  43      45.375  24.520  32.801  1.00 41.72           N
ATOM    246  CA  ALA A  43      46.010  25.186  31.666  1.00 41.55           C
ATOM    247  C   ALA A  43      45.008  25.989  30.861  1.00 38.72           C
ATOM    248  O   ALA A  43      45.297  27.095  30.422  1.00 45.04           O
ATOM    249  CB  ALA A  43      46.702  24.172  30.779  1.00 41.18           C
ATOM    250  N   LYS A  44      43.822  25.425  30.675  1.00 43.35           N
ATOM    251  CA  LYS A  44      42.782  26.083  29.896  1.00 46.54           C
ATOM    252  C   LYS A  44      42.273  27.344  30.578  1.00 41.15           C
ATOM    253  O   LYS A  44      42.085  28.365  29.919  1.00 42.22           O
ATOM    254  CB  LYS A  44      41.612  25.133  29.632  1.00 46.07           C
ATOM    255  CG  LYS A  44      40.513  25.759  28.804  1.00 52.42           C
ATOM    256  CD  LYS A  44      39.467  24.726  28.403  1.00 60.10           C
ATOM    257  CE  LYS A  44      38.348  25.362  27.595  1.00 69.61           C
ATOM    258  NZ  LYS A  44      37.334  24.344  27.183  1.00 74.04           N
ATOM    259  N   GLU A  45      42.045  27.281  31.889  1.00 36.90           N
ATOM    260  CA  GLU A  45      41.625  28.477  32.613  1.00 38.58           C
ATOM    261  C   GLU A  45      42.713  29.561  32.615  1.00 43.59           C
ATOM    262  O   GLU A  45      42.424  30.753  32.434  1.00 39.19           O
ATOM    263  CB  GLU A  45      41.240  28.143  34.050  1.00 37.41           C
ATOM    264  CG  GLU A  45      40.861  29.403  34.803  1.00 44.88           C
ATOM    265  CD  GLU A  45      39.856  29.189  35.915  1.00 46.31           C
ATOM    266  OE1 GLU A  45      39.669  28.039  36.362  1.00 53.51           O
ATOM    267  OE2 GLU A  45      39.255  30.192  36.341  1.00 48.45           O
ATOM    268  N   ILE A  46      43.960  29.127  32.823  1.00 41.13           N
ATOM    269  CA  ILE A  46      45.107  30.025  32.880  1.00 39.17           C
ATOM    270  C   ILE A  46      45.204  30.831  31.607  1.00 43.31           C
ATOM    271  O   ILE A  46      45.437  32.043  31.661  1.00 43.08           O
ATOM    272  CB  ILE A  46      46.425  29.258  33.107  1.00 41.26           C
ATOM    273  CG1 ILE A  46      46.529  28.823  34.564  1.00 39.52           C
ATOM    274  CG2 ILE A  46      47.638  30.118  32.737  1.00 42.28           C
ATOM    275  CD1 ILE A  46      47.516  27.696  34.761  1.00 37.42           C
ATOM    276  N   GLU A  47      44.997  30.176  30.463  1.00 42.93           N
ATOM    277  CA  GLU A  47      45.048  30.902  29.196  1.00 46.25           C
ATOM    278  C   GLU A  47      44.065  32.071  29.208  1.00 48.23           C
ATOM    279  O   GLU A  47      44.426  33.190  28.840  1.00 54.31           O
ATOM    280  CB  GLU A  47      44.771  29.980  28.001  1.00 48.84           C
ATOM    281  CG  GLU A  47      46.034  29.619  27.191  1.00 60.12           C
ATOM    282  CD  GLU A  47      46.800  30.847  26.641  1.00 68.55           C
ATOM    283  OE1 GLU A  47      46.217  31.963  26.524  1.00 65.40           O
ATOM    284  OE2 GLU A  47      48.005  30.690  26.329  1.00 69.68           O
ATOM    285  N   ALA A  48      42.842  31.829  29.670  1.00 44.40           N
ATOM    286  CA  ALA A  48      41.869  32.908  29.787  1.00 45.68           C
ATOM    287  C   ALA A  48      42.325  33.955  30.795  1.00 42.71           C
ATOM    288  O   ALA A  48      42.212  35.154  30.546  1.00 43.05           O
ATOM    289  CB  ALA A  48      40.487  32.353  30.180  1.00 40.35           C
ATOM    290  N   LEU A  49      42.827  33.500  31.940  1.00 42.05           N
ATOM    291  CA  LEU A  49      43.275  34.419  32.985  1.00 42.07           C
ATOM    292  C   LEU A  49      44.490  35.213  32.516  1.00 41.21           C
ATOM    293  O   LEU A  49      44.638  36.389  32.840  1.00 38.69           O
ATOM    294  CB  LEU A  49      43.593  33.658  34.276  1.00 39.63           C
ATOM    295  CG  LEU A  49      42.363  33.065  34.973  1.00 42.44           C
ATOM    296  CD1 LEU A  49      42.760  32.183  36.139  1.00 38.36           C
ATOM    297  CD2 LEU A  49      41.431  34.186  35.437  1.00 38.73           C
ATOM    298  N   LYS A  50      45.346  34.556  31.736  1.00 44.66           N
ATOM    299  CA  LYS A  50      46.541  35.184  31.169  1.00 43.47           C
ATOM    300  C   LYS A  50      46.159  36.361  30.291  1.00 45.14           C
ATOM    301  O   LYS A  50      46.784  37.416  30.321  1.00 46.40           O
ATOM    302  CB  LYS A  50      47.338  34.175  30.345  1.00 41.41           C
ATOM    303  CG  LYS A  50      48.659  34.698  29.831  1.00 46.70           C
ATOM    304  CD  LYS A  50      49.328  33.699  28.892  1.00 49.25           C
ATOM    305  CE  LYS A  50      49.462  32.327  29.528  1.00 48.24           C
ATOM    306  NZ  LYS A  50      50.104  31.323  28.613  1.00 52.57           N
ATOM    307  N   GLU A  51      45.107  36.159  29.511  1.00 49.31           N
ATOM    308  CA  GLU A  51      44.697  37.131  28.519  1.00 50.19           C
ATOM    309  C   GLU A  51      44.023  38.348  29.158  1.00 48.17           C
ATOM    310  O   GLU A  51      44.236  39.480  28.722  1.00 52.60           O
ATOM    311  CB  GLU A  51      43.774  36.460  27.497  1.00 54.30           C
ATOM    312  CG  GLU A  51      44.106  36.812  26.059  1.00 64.88           C
ATOM    313  CD  GLU A  51      45.613  36.686  25.746  1.00 69.70           C
ATOM    314  OE1 GLU A  51      46.227  35.641  26.080  1.00 63.04           O
ATOM    315  OE2 GLU A  51      46.170  37.649  25.168  1.00 65.74           O
ATOM    316  N   GLN A  52      43.226  38.117  30.198  1.00 46.48           N
ATOM    317  CA  GLN A  52      42.665  39.215  30.973  1.00 47.21           C
ATOM    318  C   GLN A  52      43.787  40.042  31.575  1.00 44.57           C
ATOM    319  O   GLN A  52      43.723  41.271  31.583  1.00 47.99           O
ATOM    320  CB  GLN A  52      41.748  38.708  32.094  1.00 46.05           C
ATOM    321  CG  GLN A  52      40.691  37.717  31.657  1.00 51.48           C
ATOM    322  CD  GLN A  52      39.781  37.264  32.805  1.00 48.65           C
ATOM    323  OE1 GLN A  52      39.358  38.066  33.645  1.00 51.39           O
ATOM    324  NE2 GLN A  52      39.487  35.970  32.840  1.00 47.92           N
ATOM    325  N   THR A  53      44.809  39.360  32.089  1.00 43.48           N
ATOM    326  CA  THR A  53      45.926  40.037  32.742  1.00 43.53           C
ATOM    327  C   THR A  53      46.710  40.866  31.736  1.00 43.51           C
ATOM    328  O   THR A  53      47.088  42.007  32.023  1.00 42.56           O
ATOM    329  CB  THR A  53      46.867  39.038  33.443  1.00 45.39           C
ATOM    330  OG1 THR A  53      46.132  38.332  34.450  1.00 41.16           O
ATOM    331  CG2 THR A  53      48.038  39.773  34.099  1.00 38.33           C
ATOM    332  N   ARG A  54      46.930  40.301  30.552  1.00 42.14           N
ATOM    333  CA  ARG A  54      47.608  41.036  29.490  1.00 44.93           C
ATOM    334  C   ARG A  54      46.911  42.363  29.253  1.00 45.69           C
ATOM    335  O   ARG A  54      47.558  43.406  29.180  1.00 47.25           O
ATOM    336  CB  ARG A  54      47.648  40.217  28.202  1.00 48.61           C
ATOM    337  CG  ARG A  54      48.510  40.821  27.092  1.00 49.01           C
ATOM    338  CD  ARG A  54      48.863  39.744  26.080  1.00 52.04           C
ATOM    339  NE  ARG A  54      49.482  38.604  26.755  1.00 58.17           N
ATOM    340  CZ  ARG A  54      49.718  37.420  26.199  1.00 60.51           C
ATOM    341  NH1 ARG A  54      49.389  37.194  24.936  1.00 69.42           N
ATOM    342  NH2 ARG A  54      50.288  36.455  26.911  1.00 61.77           N
ATOM    343  N   ASN A  55      45.582  42.316  29.174  1.00 48.40           N
ATOM    344  CA  ASN A  55      44.775  43.508  28.927  1.00 47.21           C
ATOM    345  C   ASN A  55      44.797  44.494  30.083  1.00 43.21           C
ATOM    346  O   ASN A  55      44.651  45.693  29.868  1.00 46.59           O
ATOM    347  CB  ASN A  55      43.319  43.115  28.608  1.00 48.53           C
ATOM    348  CG  ASN A  55      43.190  42.413  27.267  1.00 51.18           C
ATOM    349  OD1 ASN A  55      44.031  42.589  26.382  1.00 55.95           O
ATOM    350  ND2 ASN A  55      42.149  41.606  27.113  1.00 54.18           N
ATOM    351  N   MET A  56      44.954  44.006  31.311  1.00 43.84           N
ATOM    352  CA  MET A  56      45.186  44.930  32.425  1.00 45.42           C
ATOM    353  C   MET A  56      46.481  45.710  32.188  1.00 46.63           C
ATOM    354  O   MET A  56      46.505  46.934  32.333  1.00 47.52           O
ATOM    355  CB  MET A  56      45.256  44.201  33.770  1.00 42.38           C
ATOM    356  CG  MET A  56      43.941  43.627  34.252  1.00 47.64           C
ATOM    357  SD  MET A  56      44.101  42.708  35.800  1.00 48.62           S
ATOM    358  CE  MET A  56      43.599  41.122  35.208  1.00 41.48           C
ATOM    359  N   LEU A  57      47.550  45.003  31.810  1.00 40.92           N
ATOM    360  CA  LEU A  57      48.848  45.647  31.597  1.00 46.55           C
ATOM    361  C   LEU A  57      48.774  46.666  30.468  1.00 48.41           C
ATOM    362  O   LEU A  57      49.376  47.730  30.543  1.00 46.62           O
ATOM    363  CB  LEU A  57      49.932  44.607  31.293  1.00 38.75           C
ATOM    364  CG  LEU A  57      50.538  43.945  32.530  1.00 39.13           C
ATOM    365  CD1 LEU A  57      51.300  42.704  32.155  1.00 38.00           C
ATOM    366  CD2 LEU A  57      51.433  44.929  33.291  1.00 37.28           C
ATOM    367  N   LEU A  58      48.012  46.332  29.432  1.00 51.05           N
ATOM    368  CA  LEU A  58      47.943  47.153  28.235  1.00 48.70           C
ATOM    369  C   LEU A  58      46.885  48.242  28.327  1.00 50.11           C
ATOM    370  O   LEU A  58      46.624  48.938  27.349  1.00 51.63           O
ATOM    371  CB  LEU A  58      47.674  46.278  27.016  1.00 51.76           C
ATOM    372  CG  LEU A  58      48.796  45.307  26.661  1.00 47.81           C
ATOM    373  CD1 LEU A  58      48.473  44.597  25.363  1.00 56.00           C
ATOM    374  CD2 LEU A  58      50.106  46.047  26.553  1.00 50.69           C
ATOM    375  N   ALA A  59      46.280  48.392  29.501  1.00 50.47           N
ATOM    376  CA  ALA A  59      45.270  49.427  29.696  1.00 50.03           C
ATOM    377  C   ALA A  59      45.905  50.806  29.617  1.00 57.29           C
ATOM    378  O   ALA A  59      46.964  51.050  30.203  1.00 58.89           O
ATOM    379  CB  ALA A  59      44.559  49.245  31.027  1.00 48.85           C
ATOM    380  N   THR A  60      45.261  51.708  28.885  1.00 58.64           N
ATOM    381  CA  THR A  60      45.804  53.046  28.692  1.00 61.60           C
ATOM    382  C   THR A  60      45.299  53.997  29.761  1.00 59.63           C
ATOM    383  O   THR A  60      44.259  53.764  30.372  1.00 59.14           O
ATOM    384  CB  THR A  60      45.438  53.612  27.312  1.00 63.63           C
ATOM    385  OG1 THR A  60      44.010  53.700  27.197  1.00 63.54           O
ATOM    386  CG2 THR A  60      45.984  52.713  26.208  1.00 59.72           C
ATOM    387  N   GLY A  61      46.049  55.068  29.989  1.00 62.07           N
ATOM    388  CA  GLY A  61      45.614  56.101  30.910  1.00 62.36           C
ATOM    389  C   GLY A  61      45.761  55.738  32.375  1.00 63.53           C
ATOM    390  O   GLY A  61      45.157  56.378  33.240  1.00 59.57           O
ATOM    391  N   MET A  62      46.558  54.711  32.664  1.00 63.12           N
ATOM    392  CA  MET A  62      46.871  54.384  34.050  1.00 57.33           C
ATOM    393  C   MET A  62      47.836  55.425  34.585  1.00 52.44           C
ATOM    394  O   MET A  62      48.711  55.875  33.857  1.00 53.49           O
ATOM    395  CB  MET A  62      47.486  52.986  34.180  1.00 53.33           C
ATOM    396  CG  MET A  62      46.498  51.836  34.143  1.00 54.49           C
ATOM    397  SD  MET A  62      47.277  50.273  34.654  1.00 54.69           S
ATOM    398  CE  MET A  62      48.519  50.074  33.373  1.00 48.92           C
ATOM    399  N   LYS A  63      47.670  55.811  35.848  1.00 51.02           N
ATOM    400  CA  LYS A  63      48.667  56.635  36.529  1.00 48.60           C
ATOM    401  C   LYS A  63      49.970  55.857  36.717  1.00 47.41           C
ATOM    402  O   LYS A  63      49.993  54.625  36.620  1.00 41.98           O
ATOM    403  CB  LYS A  63      48.165  57.092  37.898  1.00 50.62           C
ATOM    404  CG  LYS A  63      46.916  57.944  37.899  1.00 58.81           C
ATOM    405  CD  LYS A  63      46.438  58.124  39.334  1.00 65.48           C
ATOM    406  CE  LYS A  63      47.599  58.549  40.237  1.00 71.92           C
ATOM    407  NZ  LYS A  63      47.388  58.144  41.657  1.00 77.93           N
ATOM    408  N   LEU A  64      51.038  56.579  37.033  1.00 42.36           N
ATOM    409  CA  LEU A  64      52.344  55.971  37.224  1.00 41.40           C
ATOM    410  C   LEU A  64      52.333  54.975  38.390  1.00 40.98           C
ATOM    411  O   LEU A  64      52.745  53.816  38.237  1.00 39.92           O
ATOM    412  CB  LEU A  64      53.406  57.057  37.459  1.00 38.67           C
ATOM    413  CG  LEU A  64      54.806  56.499  37.731  1.00 38.99           C
ATOM    414  CD1 LEU A  64      55.228  55.605  36.577  1.00 32.07           C
ATOM    415  CD2 LEU A  64      55.833  57.626  37.982  1.00 33.41           C
ATOM    416  N   ALA A  65      51.854  55.430  39.547  1.00 39.68           N
ATOM    417  CA  ALA A  65      51.824  54.604  40.746  1.00 41.35           C
ATOM    418  C   ALA A  65      51.041  53.314  40.531  1.00 42.39           C
ATOM    419  O   ALA A  65      51.470  52.247  40.969  1.00 41.97           O
ATOM    420  CB  ALA A  65      51.242  55.379  41.909  1.00 36.14           C
ATOM    421  N   ASP A  66      49.907  53.396  39.844  1.00 40.42           N
ATOM    422  CA  ASP A  66      49.094  52.197  39.631  1.00 42.94           C
ATOM    423  C   ASP A  66      49.749  51.219  38.646  1.00 41.07           C
ATOM    424  O   ASP A  66      49.613  49.988  38.781  1.00 36.23           O
ATOM    425  CB  ASP A  66      47.698  52.580  39.152  1.00 41.72           C
ATOM    426  CG  ASP A  66      46.930  53.383  40.195  1.00 48.37           C
ATOM    427  OD1 ASP A  66      47.111  53.107  41.400  1.00 48.35           O
ATOM    428  OD2 ASP A  66      46.168  54.301  39.819  1.00 55.27           O
ATOM    429  N   THR A  67      50.463  51.762  37.664  1.00 37.48           N
ATOM    430  CA  THR A  67      51.152  50.925  36.692  1.00 40.94           C
ATOM    431  C   THR A  67      52.305  50.151  37.347  1.00 34.20           C
ATOM    432  O   THR A  67      52.511  48.975  37.066  1.00 34.39           O
ATOM    433  CB  THR A  67      51.709  51.757  35.523  1.00 41.92           C
ATOM    434  OG1 THR A  67      50.657  52.537  34.942  1.00 46.60           O
ATOM    435  CG2 THR A  67      52.313  50.841  34.462  1.00 37.02           C
ATOM    436  N   LEU A  68      53.036  50.818  38.230  1.00 35.09           N
ATOM    437  CA  LEU A  68      54.197  50.214  38.861  1.00 37.11           C
ATOM    438  C   LEU A  68      53.692  49.162  39.843  1.00 36.76           C
ATOM    439  O   LEU A  68      54.261  48.065  39.955  1.00 30.50           O
ATOM    440  CB  LEU A  68      55.058  51.265  39.566  1.00 33.10           C
ATOM    441  CG  LEU A  68      55.814  52.288  38.692  1.00 37.25           C
ATOM    442  CD1 LEU A  68      56.534  53.341  39.520  1.00 33.97           C
ATOM    443  CD2 LEU A  68      56.783  51.616  37.733  1.00 33.31           C
ATOM    444  N   ASN A  69      52.607  49.491  40.537  1.00 34.71           N
ATOM    445  CA  ASN A  69      52.023  48.548  41.491  1.00 34.98           C
ATOM    446  C   ASN A  69      51.480  47.304  40.803  1.00 32.40           C
ATOM    447  O   ASN A  69      51.637  46.192  41.314  1.00 32.85           O
ATOM    448  CB  ASN A  69      50.932  49.227  42.315  1.00 37.34           C
ATOM    449  CG  ASN A  69      51.507  50.136  43.386  1.00 46.99           C
ATOM    450  OD1 ASN A  69      52.562  49.843  43.971  1.00 49.46           O
ATOM    451  ND2 ASN A  69      50.823  51.243  43.654  1.00 48.75           N
ATOM    452  N   LEU A  70      50.867  47.488  39.635  1.00 32.78           N
ATOM    453  CA  LEU A  70      50.396  46.363  38.831  1.00 34.08           C
ATOM    454  C   LEU A  70      51.563  45.438  38.439  1.00 34.39           C
ATOM    455  O   LEU A  70      51.514  44.219  38.658  1.00 33.67           O
ATOM    456  CB  LEU A  70      49.660  46.863  37.578  1.00 31.11           C
ATOM    457  CG  LEU A  70      49.121  45.732  36.687  1.00 34.88           C
ATOM    458  CD1 LEU A  70      48.253  44.781  37.494  1.00 29.94           C
ATOM    459  CD2 LEU A  70      48.346  46.260  35.485  1.00 34.67           C
ATOM    460  N   ILE A  71      52.619  46.015  37.872  1.00 33.16           N
ATOM    461  CA  ILE A  71      53.772  45.220  37.461  1.00 33.86           C
ATOM    462  C   ILE A  71      54.424  44.519  38.652  1.00 30.65           C
ATOM    463  O   ILE A  71      54.776  43.341  38.562  1.00 31.54           O
ATOM    464  CB  ILE A  71      54.817  46.086  36.737  1.00 37.75           C
ATOM    465  CG1 ILE A  71      54.238  46.592  35.409  1.00 36.44           C
ATOM    466  CG2 ILE A  71      56.118  45.296  36.517  1.00 29.56           C
ATOM    467  CD1 ILE A  71      55.161  47.514  34.655  1.00 38.08           C
ATOM    468  N   ASP A  72      54.552  45.236  39.768  1.00 28.99           N
ATOM    469  CA  ASP A  72      55.154  44.690  40.987  1.00 28.53           C
ATOM    470  C   ASP A  72      54.389  43.469  41.487  1.00 30.79           C
ATOM    471  O   ASP A  72      54.985  42.425  41.798  1.00 32.15           O
ATOM    472  CB  ASP A  72      55.198  45.755  42.083  1.00 29.83           C
ATOM    473  CG  ASP A  72      55.979  45.309  43.307  1.00 31.03           C
ATOM    474  OD1 ASP A  72      56.976  44.566  43.160  1.00 31.45           O
ATOM    475  OD2 ASP A  72      55.609  45.723  44.425  1.00 28.55           O
ATOM    476  N   THR A  73      53.065  43.603  41.550  1.00 31.02           N
ATOM    477  CA  THR A  73      52.195  42.535  42.035  1.00 29.55           C
ATOM    478  C   THR A  73      52.278  41.306  41.140  1.00 28.09           C
ATOM    479  O   THR A  73      52.413  40.183  41.627  1.00 31.31           O
ATOM    480  CB  THR A  73      50.743  43.040  42.136  1.00 32.38           C
ATOM    481  OG1 THR A  73      50.702  44.156  43.036  1.00 27.84           O
ATOM    482  CG2 THR A  73      49.810  41.953  42.642  1.00 27.83           C
ATOM    483  N   ILE A  74      52.227  41.512  39.829  1.00 29.84           N
ATOM    484  CA  ILE A  74      52.351  40.395  38.895  1.00 26.44           C
ATOM    485  C   ILE A  74      53.705  39.705  39.073  1.00 31.60           C
ATOM    486  O   ILE A  74      53.786  38.468  39.046  1.00 30.45           O
ATOM    487  CB  ILE A  74      52.168  40.856  37.435  1.00 28.07           C
ATOM    488  CG1 ILE A  74      50.721  41.331  37.212  1.00 33.80           C
ATOM    489  CG2 ILE A  74      52.479  39.732  36.473  1.00 30.25           C
ATOM    490  CD1 ILE A  74      50.455  41.951  35.836  1.00 32.41           C
ATOM    491  N   GLU A  75      54.757  40.492  39.300  1.00 32.33           N
ATOM    492  CA  GLU A  75      56.085  39.915  39.548  1.00 32.46           C
ATOM    493  C   GLU A  75      56.110  39.138  40.846  1.00 28.08           C
ATOM    494  O   GLU A  75      56.575  38.014  40.866  1.00 30.59           O
ATOM    495  CB  GLU A  75      57.172  41.001  39.556  1.00 28.37           C
ATOM    496  CG  GLU A  75      57.451  41.508  38.167  1.00 30.88           C
ATOM    497  CD  GLU A  75      58.653  42.432  38.073  1.00 35.83           C
ATOM    498  OE1 GLU A  75      59.045  43.044  39.096  1.00 31.36           O
ATOM    499  OE2 GLU A  75      59.197  42.543  36.952  1.00 38.20           O
ATOM    500  N   ARG A  76      55.586  39.711  41.927  1.00 28.70           N
ATOM    501  CA  ARG A  76      55.610  39.006  43.212  1.00 29.69           C
ATOM    502  C   ARG A  76      54.730  37.743  43.212  1.00 30.55           C
ATOM    503  O   ARG A  76      54.988  36.807  43.972  1.00 29.14           O
ATOM    504  CB  ARG A  76      55.183  39.939  44.347  1.00 26.76           C
ATOM    505  CG  ARG A  76      56.180  41.090  44.680  1.00 30.48           C
ATOM    506  CD  ARG A  76      55.488  42.052  45.653  1.00 30.93           C
ATOM    507  NE  ARG A  76      56.290  43.176  46.149  1.00 32.62           N
ATOM    508  CZ  ARG A  76      56.967  43.154  47.293  1.00 33.02           C
ATOM    509  NH1 ARG A  76      56.985  42.054  48.038  1.00 33.74           N
ATOM    510  NH2 ARG A  76      57.640  44.218  47.684  1.00 32.86           N
ATOM    511  N   LEU A  77      53.699  37.724  42.368  1.00 31.73           N
ATOM    512  CA  LEU A  77      52.788  36.577  42.266  1.00 30.37           C
ATOM    513  C   LEU A  77      53.414  35.470  41.446  1.00 32.32           C
ATOM    514  O   LEU A  77      52.859  34.369  41.337  1.00 29.05           O
ATOM    515  CB  LEU A  77      51.446  36.990  41.642  1.00 29.12           C
ATOM    516  CG  LEU A  77      50.505  37.786  42.553  1.00 28.92           C
ATOM    517  CD1 LEU A  77      49.322  38.346  41.785  1.00 30.95           C
ATOM    518  CD2 LEU A  77      50.032  36.919  43.719  1.00 24.67           C
ATOM    519  N   GLY A  78      54.572  35.760  40.855  1.00 33.75           N
ATOM    520  CA  GLY A  78      55.334  34.722  40.174  1.00 31.39           C
ATOM    521  C   GLY A  78      54.858  34.462  38.762  1.00 30.49           C
ATOM    522  O   GLY A  78      55.213  33.460  38.174  1.00 32.73           O
ATOM    523  N   ILE A  79      54.076  35.376  38.199  1.00 33.83           N
ATOM    524  CA  ILE A  79      53.489  35.130  36.880  1.00 35.64           C
ATOM    525  C   ILE A  79      53.995  36.104  35.819  1.00 35.35           C
ATOM    526  O   ILE A  79      53.531  36.064  34.682  1.00 34.91           O
ATOM    527  CB  ILE A  79      51.915  35.196  36.907  1.00 33.50           C
ATOM    528  CG1 ILE A  79      51.422  36.352  37.782  1.00 30.07           C
ATOM    529  CG2 ILE A  79      51.321  33.867  37.389  1.00 34.28           C
ATOM    530  CD1 ILE A  79      49.879  36.529  37.779  1.00 32.11           C
ATOM    531  N   SER A  80      54.963  36.951  36.163  1.00 31.63           N
ATOM    532  CA  SER A  80      55.432  37.960  35.203  1.00 36.29           C
ATOM    533  C   SER A  80      56.191  37.342  34.026  1.00 38.24           C
ATOM    534  O   SER A  80      56.311  37.971  32.979  1.00 36.61           O
ATOM    535  CB  SER A  80      56.315  39.013  35.892  1.00 32.24           C
ATOM    536  OG  SER A  80      57.452  38.419  36.489  1.00 32.85           O
ATOM    537  N   TYR A  81      56.677  36.109  34.183  1.00 34.12           N
ATOM    538  CA  TYR A  81      57.388  35.433  33.096  1.00 36.71           C
ATOM    539  C   TYR A  81      56.487  35.203  31.877  1.00 41.69           C
ATOM    540  O   TYR A  81      56.980  34.842  30.809  1.00 43.21           O
ATOM    541  CB  TYR A  81      57.982  34.089  33.571  1.00 37.90           C
ATOM    542  CG  TYR A  81      56.951  32.970  33.731  1.00 39.82           C
ATOM    543  CD1 TYR A  81      56.741  32.037  32.715  1.00 41.17           C
ATOM    544  CD2 TYR A  81      56.203  32.841  34.894  1.00 34.96           C
ATOM    545  CE1 TYR A  81      55.803  31.012  32.853  1.00 42.68           C
ATOM    546  CE2 TYR A  81      55.259  31.817  35.040  1.00 37.49           C
ATOM    547  CZ  TYR A  81      55.060  30.914  34.015  1.00 38.37           C
ATOM    548  OH  TYR A  81      54.136  29.902  34.149  1.00 37.00           O
ATOM    549  N   HIS A  82      55.176  35.401  32.042  1.00 36.44           N
ATOM    550  CA  HIS A  82      54.229  35.359  30.926  1.00 40.83           C
ATOM    551  C   HIS A  82      54.209  36.643  30.121  1.00 39.82           C
ATOM    552  O   HIS A  82      53.711  36.657  28.995  1.00 44.16           O
ATOM    553  CB  HIS A  82      52.793  35.091  31.415  1.00 39.52           C
ATOM    554  CG  HIS A  82      52.569  33.697  31.900  1.00 34.37           C
ATOM    555  ND1 HIS A  82      52.741  32.595  31.090  1.00 34.36           N
ATOM    556  CD2 HIS A  82      52.183  33.223  33.108  1.00 34.06           C
ATOM    557  CE1 HIS A  82      52.468  31.500  31.778  1.00 37.83           C
ATOM    558  NE2 HIS A  82      52.126  31.853  33.004  1.00 41.12           N
ATOM    559  N   PHE A  83      54.716  37.724  30.709  1.00 39.51           N
ATOM    560  CA  PHE A  83      54.549  39.058  30.140  1.00 40.63           C
ATOM    561  C   PHE A  83      55.852  39.826  30.058  1.00 43.43           C
ATOM    562  O   PHE A  83      55.879  41.032  30.323  1.00 43.10           O
ATOM    563  CB  PHE A  83      53.550  39.866  30.968  1.00 39.88           C
ATOM    564  CG  PHE A  83      52.290  39.130  31.259  1.00 42.58           C
ATOM    565  CD1 PHE A  83      51.296  39.032  30.302  1.00 44.77           C
ATOM    566  CD2 PHE A  83      52.103  38.511  32.486  1.00 41.34           C
ATOM    567  CE1 PHE A  83      50.132  38.339  30.566  1.00 43.83           C
ATOM    568  CE2 PHE A  83      50.936  37.821  32.755  1.00 44.26           C
ATOM    569  CZ  PHE A  83      49.949  37.735  31.792  1.00 42.79           C
ATOM    570  N   GLU A  84      56.922  39.128  29.690  1.00 41.38           N
ATOM    571  CA  GLU A  84      58.239  39.732  29.624  1.00 44.66           C
ATOM    572  C   GLU A  84      58.274  40.906  28.669  1.00 45.06           C
ATOM    573  O   GLU A  84      58.856  41.942  28.984  1.00 48.32           O
ATOM    574  CB  GLU A  84      59.278  38.690  29.219  1.00 47.87           C
ATOM    575  CG  GLU A  84      59.384  37.554  30.229  1.00 50.06           C
ATOM    576  CD  GLU A  84      60.551  36.623  29.959  1.00 63.39           C
ATOM    577  OE1 GLU A  84      61.179  36.754  28.880  1.00 70.74           O
ATOM    578  OE2 GLU A  84      60.838  35.763  30.829  1.00 58.41           O
ATOM    579  N   LYS A  85      57.624  40.767  27.519  1.00 45.29           N
ATOM    580  CA  LYS A  85      57.641  41.834  26.524  1.00 44.36           C
ATOM    581  C   LYS A  85      56.762  43.019  26.918  1.00 48.71           C
ATOM    582  O   LYS A  85      57.147  44.170  26.709  1.00 46.38           O
ATOM    583  CB  LYS A  85      57.201  41.314  25.160  1.00 50.34           C
ATOM    584  CG  LYS A  85      57.389  42.340  24.051  1.00 56.68           C
ATOM    585  CD  LYS A  85      56.271  42.274  23.027  1.00 56.77           C
ATOM    586  CE  LYS A  85      56.167  43.593  22.265  1.00 63.74           C
ATOM    587  NZ  LYS A  85      54.887  43.699  21.502  1.00 79.38           N
ATOM    588  N   GLU A  86      55.579  42.745  27.471  1.00 44.26           N
ATOM    589  CA  GLU A  86      54.686  43.825  27.866  1.00 41.96           C
ATOM    590  C   GLU A  86      55.295  44.660  28.985  1.00 43.02           C
ATOM    591  O   GLU A  86      55.263  45.880  28.940  1.00 41.89           O
ATOM    592  CB  GLU A  86      53.320  43.290  28.306  1.00 43.64           C
ATOM    593  CG  GLU A  86      52.461  42.719  27.181  1.00 42.90           C
ATOM    594  CD  GLU A  86      52.755  41.263  26.878  1.00 48.96           C
ATOM    595  OE1 GLU A  86      53.742  40.712  27.410  1.00 43.96           O
ATOM    596  OE2 GLU A  86      51.994  40.663  26.087  1.00 58.36           O
ATOM    597  N   ILE A  87      55.830  43.990  29.998  1.00 44.25           N
ATOM    598  CA  ILE A  87      56.401  44.669  31.155  1.00 42.11           C
ATOM    599  C   ILE A  87      57.624  45.494  30.736  1.00 43.62           C
ATOM    600  O   ILE A  87      57.848  46.608  31.229  1.00 41.44           O
ATOM    601  CB  ILE A  87      56.781  43.647  32.251  1.00 42.71           C
ATOM    602  CG1 ILE A  87      55.511  43.072  32.889  1.00 41.53           C
ATOM    603  CG2 ILE A  87      57.679  44.272  33.310  1.00 34.52           C
ATOM    604  CD1 ILE A  87      55.787  41.965  33.863  1.00 36.41           C
ATOM    605  N   ASP A  88      58.390  44.951  29.796  1.00 42.59           N
ATOM    606  CA  ASP A  88      59.577  45.626  29.313  1.00 44.37           C
ATOM    607  C   ASP A  88      59.249  46.933  28.615  1.00 45.59           C
ATOM    608  O   ASP A  88      59.863  47.951  28.899  1.00 46.52           O
ATOM    609  CB  ASP A  88      60.359  44.735  28.362  1.00 47.69           C
ATOM    610  CG  ASP A  88      61.726  45.291  28.067  1.00 53.48           C
ATOM    611  OD1 ASP A  88      62.638  45.032  28.877  1.00 57.54           O
ATOM    612  OD2 ASP A  88      61.888  46.009  27.052  1.00 56.12           O
ATOM    613  N   ASP A  89      58.291  46.895  27.694  1.00 46.15           N
ATOM    614  CA  ASP A  89      57.855  48.092  26.983  1.00 43.74           C
ATOM    615  C   ASP A  89      57.377  49.163  27.942  1.00 46.47           C
ATOM    616  O   ASP A  89      57.719  50.342  27.800  1.00 46.72           O
ATOM    617  CB  ASP A  89      56.736  47.758  25.994  1.00 46.76           C
ATOM    618  CG  ASP A  89      57.219  46.914  24.836  1.00 49.08           C
ATOM    619  OD1 ASP A  89      58.425  46.984  24.515  1.00 49.12           O
ATOM    620  OD2 ASP A  89      56.393  46.191  24.242  1.00 54.75           O
ATOM    621  N   ILE A  90      56.584  48.759  28.926  1.00 44.04           N
ATOM    622  CA  ILE A  90      56.066  49.728  29.888  1.00 43.08           C
ATOM    623  C   ILE A  90      57.184  50.335  30.734  1.00 39.36           C
ATOM    624  O   ILE A  90      57.208  51.528  30.966  1.00 41.02           O
ATOM    625  CB  ILE A  90      55.020  49.090  30.802  1.00 37.98           C
ATOM    626  CG1 ILE A  90      53.772  48.734  29.993  1.00 44.53           C
ATOM    627  CG2 ILE A  90      54.669  50.030  31.922  1.00 36.29           C
ATOM    628  CD1 ILE A  90      52.899  47.660  30.637  1.00 43.07           C
ATOM    629  N   LEU A  91      58.120  49.512  31.196  1.00 40.58           N
ATOM    630  CA  LEU A  91      59.214  50.040  31.999  1.00 42.74           C
ATOM    631  C   LEU A  91      60.156  50.884  31.138  1.00 41.05           C
ATOM    632  O   LEU A  91      60.724  51.863  31.609  1.00 37.54           O
ATOM    633  CB  LEU A  91      59.987  48.909  32.688  1.00 41.77           C
ATOM    634  CG  LEU A  91      59.237  48.207  33.828  1.00 42.09           C
ATOM    635  CD1 LEU A  91      60.142  47.159  34.470  1.00 37.21           C
ATOM    636  CD2 LEU A  91      58.741  49.226  34.863  1.00 34.23           C
ATOM    637  N   ASP A  92      60.308  50.498  29.876  1.00 42.38           N
ATOM    638  CA  ASP A  92      61.118  51.264  28.953  1.00 45.33           C
ATOM    639  C   ASP A  92      60.527  52.658  28.811  1.00 47.41           C
ATOM    640  O   ASP A  92      61.232  53.658  28.933  1.00 49.97           O
ATOM    641  CB  ASP A  92      61.207  50.571  27.592  1.00 48.03           C
ATOM    642  CG  ASP A  92      62.167  51.279  26.643  1.00 56.21           C
ATOM    643  OD1 ASP A  92      63.337  50.858  26.551  1.00 53.60           O
ATOM    644  OD2 ASP A  92      61.750  52.255  25.988  1.00 61.47           O
ATOM    645  N   GLN A  93      59.223  52.722  28.580  1.00 46.87           N
ATOM    646  CA  GLN A  93      58.566  53.998  28.408  1.00 46.78           C
ATOM    647  C   GLN A  93      58.697  54.847  29.660  1.00 46.07           C
ATOM    648  O   GLN A  93      58.903  56.050  29.574  1.00 47.72           O
ATOM    649  CB  GLN A  93      57.094  53.806  28.053  1.00 45.74           C
ATOM    650  CG  GLN A  93      56.342  55.112  27.849  1.00 52.88           C
ATOM    651  CD  GLN A  93      54.860  54.882  27.607  1.00 73.72           C
ATOM    652  OE1 GLN A  93      54.475  54.167  26.677  1.00 73.39           O
ATOM    653  NE2 GLN A  93      54.018  55.484  28.448  1.00 77.08           N
ATOM    654  N   ILE A  94      58.593  54.223  30.825  1.00 42.78           N
ATOM    655  CA  ILE A  94      58.710  54.961  32.079  1.00 42.36           C
ATOM    656  C   ILE A  94      60.130  55.494  32.271  1.00 48.68           C
ATOM    657  O   ILE A  94      60.336  56.622  32.740  1.00 46.91           O
ATOM    658  CB  ILE A  94      58.291  54.080  33.268  1.00 40.50           C
ATOM    659  CG1 ILE A  94      56.757  53.940  33.294  1.00 40.83           C
ATOM    660  CG2 ILE A  94      58.820  54.647  34.581  1.00 38.25           C
ATOM    661  CD1 ILE A  94      56.244  52.813  34.174  1.00 36.40           C
ATOM    662  N   TYR A  95      61.107  54.680  31.882  1.00 43.57           N
ATOM    663  CA  TYR A  95      62.510  55.063  31.949  1.00 44.75           C
ATOM    664  C   TYR A  95      62.780  56.301  31.121  1.00 45.23           C
ATOM    665  O   TYR A  95      63.353  57.271  31.609  1.00 42.21           O
ATOM    666  CB  TYR A  95      63.386  53.923  31.449  1.00 40.02           C
ATOM    667  CG  TYR A  95      64.858  54.222  31.444  1.00 42.27           C
ATOM    668  CD1 TYR A  95      65.490  54.723  32.574  1.00 40.50           C
ATOM    669  CD2 TYR A  95      65.627  53.974  30.318  1.00 47.35           C
ATOM    670  CE1 TYR A  95      66.847  54.978  32.580  1.00 41.95           C
ATOM    671  CE2 TYR A  95      66.987  54.223  30.315  1.00 47.14           C
ATOM    672  CZ  TYR A  95      67.591  54.729  31.447  1.00 44.43           C
ATOM    673  OH  TYR A  95      68.947  54.976  31.443  1.00 49.77           O
ATOM    674  N   ASN A  96      62.335  56.242  29.863  1.00 49.72           N
ATOM    675  CA  ASN A  96      62.587  57.279  28.861  1.00 50.16           C
ATOM    676  C   ASN A  96      61.700  58.513  28.980  1.00 54.85           C
ATOM    677  O   ASN A  96      62.210  59.614  28.838  1.00 56.34           O
ATOM    678  CB  ASN A  96      62.478  56.689  27.469  1.00 49.33           C
ATOM    679  CG  ASN A  96      63.805  56.129  26.994  1.00 50.85           C
ATOM    680  OD1 ASN A  96      63.964  54.919  26.828  1.00 56.06           O
ATOM    681  ND2 ASN A  96      64.782  57.009  26.817  1.00 55.01           N
ATOM    682  N   GLN A  97      60.394  58.351  29.220  1.00 58.00           N
ATOM    683  CA  GLN A  97      59.665  59.390  29.986  1.00 59.81           C
ATOM    684  C   GLN A  97      60.561  60.135  30.962  1.00 60.09           C
ATOM    685  O   GLN A  97      60.741  61.346  30.849  1.00 66.60           O
ATOM    686  CB  GLN A  97      58.507  58.801  30.803  1.00 59.53           C
ATOM    687  CG  GLN A  97      57.064  59.178  30.541  1.00 66.98           C
ATOM    688  CD  GLN A  97      56.138  58.050  30.910  1.00 65.03           C
ATOM    689  OE1 GLN A  97      56.577  56.951  31.102  1.00 69.57           O
ATOM    690  NE2 GLN A  97      54.875  58.344  31.115  1.00 74.96           N
ATOM    691  N   ASN A  98      61.089  59.412  31.954  1.00 59.58           N
ATOM    692  CA  ASN A  98      61.816  60.010  33.104  1.00 64.27           C
ATOM    693  C   ASN A  98      60.909  60.967  33.860  1.00 74.22           C
ATOM    694  O   ASN A  98      59.920  61.444  33.277  1.00 77.54           O
ATOM    695  CB  ASN A  98      63.105  60.731  32.627  1.00 68.35           C
ATOM    696  CG  ASN A  98      64.218  60.759  33.686  1.00 71.13           C
ATOM    697  OD1 ASN A  98      64.321  59.854  34.520  1.00 74.68           O
ATOM    698  ND2 ASN A  98      65.091  61.766  33.610  1.00 67.87           N
ATOM    699  N   SER A  99      61.267  61.232  35.119  1.00 77.39           N
ATOM    700  CA  SER A  99      60.615  62.211  35.962  1.00 84.28           C
ATOM    701  C   SER A  99      59.225  61.778  36.457  1.00 85.98           C
ATOM    702  O   SER A  99      58.414  61.298  35.651  1.00 83.82           O
ATOM    703  CB  SER A  99      60.485  63.579  35.255  1.00 87.04           C
ATOM    704  OG  SER A  99      59.259  63.738  34.584  1.00 88.71           O
ATOM    705  N   ASN A 100      58.936  61.923  37.768  1.00 88.72           N
ATOM    706  CA  ASN A 100      59.914  61.807  38.873  1.00 85.88           C
ATOM    707  C   ASN A 100      59.097  61.495  40.123  1.00 87.91           C
ATOM    708  O   ASN A 100      59.508  60.685  40.962  1.00 79.26           O
ATOM    709  CB  ASN A 100      60.819  63.056  39.070  1.00 80.29           C
ATOM    710  CG  ASN A 100      60.069  64.324  39.473  1.00 86.98           C
ATOM    711  OD1 ASN A 100      58.842  64.374  39.561  1.00 86.41           O
ATOM    712  ND2 ASN A 100      60.845  65.368  39.750  1.00 88.03           N
ATOM    713  N   CYS A 101      57.929  62.142  40.214  1.00 84.47           N
ATOM    714  CA  CYS A 101      56.958  61.902  41.288  1.00 75.37           C
ATOM    715  C   CYS A 101      57.461  62.256  42.695  1.00 72.94           C
ATOM    716  O   CYS A 101      58.623  62.038  43.033  1.00 71.03           O
ATOM    717  CB  CYS A 101      56.502  60.447  41.281  1.00 66.28           C
ATOM    718  SG  CYS A 101      55.713  60.035  42.834  1.00 76.61           S
ATOM    719  N   ASN A 102      56.568  62.790  43.523  1.00 71.29           N
ATOM    720  CA  ASN A 102      56.970  63.317  44.830  1.00 71.98           C
ATOM    721  C   ASN A 102      56.796  62.311  45.966  1.00 63.94           C
ATOM    722  O   ASN A 102      57.089  62.604  47.127  1.00 63.61           O
ATOM    723  CB  ASN A 102      56.189  64.597  45.142  1.00 72.26           C
ATOM    724  CG  ASN A 102      56.252  65.604  44.007  1.00 79.83           C
ATOM    725  OD1 ASN A 102      55.269  66.286  43.713  1.00 84.15           O
ATOM    726  ND2 ASN A 102      57.414  65.696  43.357  1.00 79.01           N
ATOM    727  N   ASP A 103      56.321  61.126  45.614  1.00 54.62           N
ATOM    728  CA  ASP A 103      55.974  60.102  46.580  1.00 44.71           C
ATOM    729  C   ASP A 103      57.174  59.152  46.788  1.00 42.43           C
ATOM    730  O   ASP A 103      57.689  58.570  45.826  1.00 40.29           O
ATOM    731  CB  ASP A 103      54.723  59.378  46.065  1.00 48.36           C
ATOM    732  CG  ASP A 103      54.128  58.417  47.062  1.00 53.48           C
ATOM    733  OD1 ASP A 103      54.877  57.847  47.880  1.00 58.00           O
ATOM    734  OD2 ASP A 103      52.896  58.197  47.004  1.00 61.27           O
ATOM    735  N   LEU A 104      57.631  59.014  48.032  1.00 35.41           N
ATOM    736  CA  LEU A 104      58.737  58.110  48.346  1.00 37.17           C
ATOM    737  C   LEU A 104      58.443  56.677  47.910  1.00 38.03           C
ATOM    738  O   LEU A 104      59.288  56.004  47.313  1.00 34.84           O
ATOM    739  CB  LEU A 104      59.050  58.124  49.840  1.00 33.12           C
ATOM    740  CG  LEU A 104      60.060  57.040  50.244  1.00 35.15           C
ATOM    741  CD1 LEU A 104      61.449  57.288  49.608  1.00 30.82           C
ATOM    742  CD2 LEU A 104      60.170  56.966  51.749  1.00 31.44           C
ATOM    743  N   CYS A 105      57.228  56.230  48.211  1.00 35.87           N
ATOM    744  CA  CYS A 105      56.768  54.895  47.884  1.00 35.41           C
ATOM    745  C   CYS A 105      56.894  54.606  46.399  1.00 33.79           C
ATOM    746  O   CYS A 105      57.487  53.616  46.000  1.00 35.35           O
ATOM    747  CB  CYS A 105      55.305  54.727  48.329  1.00 45.89           C
ATOM    748  SG  CYS A 105      54.576  53.207  47.763  1.00 61.77           S
ATOM    749  O   THR A 106      58.147  54.886  42.596  1.00 36.00           O
ATOM    750  N   THR A 106      56.346  55.494  45.584  1.00 34.83           N
ATOM    751  CA  THR A 106      56.363  55.332  44.141  1.00 35.60           C
ATOM    752  C   THR A 106      57.774  55.538  43.568  1.00 36.75           C
ATOM    753  CB  THR A 106      55.366  56.310  43.479  1.00 45.30           C
ATOM    754  OG1 THR A 106      54.063  56.113  44.050  1.00 47.28           O
ATOM    755  CG2 THR A 106      55.285  56.083  41.981  1.00 45.84           C
ATOM    756  N   SER A 107      58.555  56.427  44.182  1.00 33.20           N
ATOM    757  CA  SER A 107      59.923  56.706  43.730  1.00 37.11           C
ATOM    758  C   SER A 107      60.826  55.496  43.913  1.00 35.47           C
ATOM    759  O   SER A 107      61.526  55.093  42.992  1.00 33.46           O
ATOM    760  CB  SER A 107      60.521  57.895  44.479  1.00 37.53           C
ATOM    761  OG  SER A 107      59.835  59.086  44.152  1.00 40.44           O
ATOM    762  N   ALA A 108      60.781  54.916  45.109  1.00 35.61           N
ATOM    763  CA  ALA A 108      61.574  53.744  45.441  1.00 30.44           C
ATOM    764  C   ALA A 108      61.180  52.536  44.596  1.00 30.82           C
ATOM    765  O   ALA A 108      62.049  51.767  44.140  1.00 30.25           O
ATOM    766  CB  ALA A 108      61.433  53.430  46.910  1.00 29.26           C
ATOM    767  N   LEU A 109      59.881  52.361  44.381  1.00 30.73           N
ATOM    768  CA  LEU A 109      59.409  51.246  43.572  1.00 32.84           C
ATOM    769  C   LEU A 109      59.877  51.448  42.140  1.00 29.42           C
ATOM    770  O   LEU A 109      60.401  50.535  41.522  1.00 29.88           O
ATOM    771  CB  LEU A 109      57.877  51.103  43.630  1.00 27.64           C
ATOM    772  CG  LEU A 109      57.301  49.913  42.837  1.00 32.90           C
ATOM    773  CD1 LEU A 109      57.964  48.609  43.244  1.00 29.07           C
ATOM    774  CD2 LEU A 109      55.791  49.771  42.992  1.00 29.84           C
ATOM    775  N   GLN A 110      59.680  52.650  41.619  1.00 33.00           N
ATOM    776  CA  GLN A 110      60.157  52.985  40.282  1.00 34.64           C
ATOM    777  C   GLN A 110      61.649  52.708  40.135  1.00 32.34           C
ATOM    778  O   GLN A 110      62.094  52.141  39.133  1.00 29.92           O
ATOM    779  CB  GLN A 110      59.888  54.450  39.960  1.00 33.54           C
ATOM    780  CG  GLN A 110      60.389  54.868  38.579  1.00 40.11           C
ATOM    781  CD  GLN A 110      60.062  56.316  38.248  1.00 43.53           C
ATOM    782  OE1 GLN A 110      60.510  57.223  38.923  1.00 49.55           O
ATOM    783  NE2 GLN A 110      59.288  56.529  37.198  1.00 54.92           N
ATOM    784  N   PHE A 111      62.420  53.112  41.136  1.00 28.72           N
ATOM    785  CA  PHE A 111      63.856  52.890  41.095  1.00 32.24           C
ATOM    786  C   PHE A 111      64.181  51.393  41.051  1.00 32.87           C
ATOM    787  O   PHE A 111      64.967  50.960  40.208  1.00 31.33           O
ATOM    788  CB  PHE A 111      64.540  53.539  42.296  1.00 32.22           C
ATOM    789  CG  PHE A 111      66.033  53.366  42.304  1.00 30.75           C
ATOM    790  CD1 PHE A 111      66.850  54.270  41.641  1.00 33.13           C
ATOM    791  CD2 PHE A 111      66.618  52.302  42.969  1.00 31.22           C
ATOM    792  CE1 PHE A 111      68.227  54.125  41.643  1.00 32.92           C
ATOM    793  CE2 PHE A 111      68.001  52.144  42.972  1.00 34.99           C
ATOM    794  CZ  PHE A 111      68.807  53.062  42.307  1.00 33.11           C
ATOM    795  N   ARG A 112      63.565  50.608  41.939  1.00 28.29           N
ATOM    796  CA  ARG A 112      63.908  49.192  42.048  1.00 28.34           C
ATOM    797  C   ARG A 112      63.543  48.421  40.783  1.00 33.87           C
ATOM    798  O   ARG A 112      64.375  47.683  40.229  1.00 30.57           O
ATOM    799  CB  ARG A 112      63.226  48.536  43.256  1.00 24.37           C
ATOM    800  CG  ARG A 112      63.338  47.006  43.234  1.00 28.97           C
ATOM    801  CD  ARG A 112      62.908  46.345  44.534  1.00 28.05           C
ATOM    802  NE  ARG A 112      61.467  46.440  44.781  1.00 29.17           N
ATOM    803  CZ  ARG A 112      60.563  45.640  44.230  1.00 29.07           C
ATOM    804  NH1 ARG A 112      60.957  44.698  43.396  1.00 28.66           N
ATOM    805  NH2 ARG A 112      59.268  45.778  44.511  1.00 28.72           N
ATOM    806  N   LEU A 113      62.298  48.576  40.336  1.00 29.67           N
ATOM    807  CA  LEU A 113      61.824  47.864  39.150  1.00 29.75           C
ATOM    808  C   LEU A 113      62.690  48.147  37.917  1.00 31.86           C
ATOM    809  O   LEU A 113      63.050  47.231  37.182  1.00 31.48           O
ATOM    810  CB  LEU A 113      60.364  48.234  38.858  1.00 30.66           C
ATOM    811  CG  LEU A 113      59.324  47.705  39.856  1.00 33.27           C
ATOM    812  CD1 LEU A 113      57.892  47.980  39.370  1.00 31.03           C
ATOM    813  CD2 LEU A 113      59.538  46.202  40.119  1.00 26.86           C
ATOM    814  N   LEU A 114      63.016  49.418  37.689  1.00 31.02           N
ATOM    815  CA  LEU A 114      63.830  49.792  36.539  1.00 32.81           C
ATOM    816  C   LEU A 114      65.224  49.176  36.654  1.00 29.81           C
ATOM    817  O   LEU A 114      65.711  48.534  35.726  1.00 30.82           O
ATOM    818  CB  LEU A 114      63.920  51.318  36.405  1.00 34.65           C
ATOM    819  CG  LEU A 114      62.636  52.002  35.908  1.00 38.52           C
ATOM    820  CD1 LEU A 114      62.787  53.535  35.807  1.00 36.34           C
ATOM    821  CD2 LEU A 114      62.206  51.421  34.581  1.00 37.24           C
ATOM    822  N   ARG A 115      65.853  49.346  37.806  1.00 28.32           N
ATOM    823  CA  ARG A 115      67.179  48.778  38.010  1.00 30.46           C
ATOM    824  C   ARG A 115      67.196  47.258  37.850  1.00 32.31           C
ATOM    825  O   ARG A 115      68.111  46.708  37.227  1.00 29.89           O
ATOM    826  CB  ARG A 115      67.710  49.164  39.384  1.00 30.88           C
ATOM    827  CG  ARG A 115      68.119  50.616  39.486  1.00 29.54           C
ATOM    828  CD  ARG A 115      69.236  50.927  38.504  1.00 31.51           C
ATOM    829  NE  ARG A 115      69.770  52.265  38.728  1.00 33.07           N
ATOM    830  CZ  ARG A 115      70.784  52.537  39.543  1.00 34.81           C
ATOM    831  NH1 ARG A 115      71.379  51.550  40.209  1.00 28.20           N
ATOM    832  NH2 ARG A 115      71.204  53.792  39.690  1.00 32.16           N
ATOM    833  N   GLN A 116      66.178  46.578  38.385  1.00 28.38           N
ATOM    834  CA  GLN A 116      66.153  45.121  38.336  1.00 28.41           C
ATOM    835  C   GLN A 116      66.008  44.646  36.900  1.00 32.10           C
ATOM    836  O   GLN A 116      66.373  43.513  36.565  1.00 28.19           O
ATOM    837  CB  GLN A 116      65.021  44.559  39.196  1.00 31.06           C
ATOM    838  CG  GLN A 116      65.304  44.583  40.688  1.00 31.73           C
ATOM    839  CD  GLN A 116      64.174  43.933  41.491  1.00 34.67           C
ATOM    840  OE1 GLN A 116      63.035  44.407  41.480  1.00 30.55           O
ATOM    841  NE2 GLN A 116      64.489  42.841  42.182  1.00 30.66           N
ATOM    842  N   HIS A 117      65.488  45.525  36.047  1.00 29.87           N
ATOM    843  CA  HIS A 117      65.298  45.198  34.636  1.00 32.83           C
ATOM    844  C   HIS A 117      66.390  45.778  33.717  1.00 37.19           C
ATOM    845  O   HIS A 117      66.263  45.737  32.492  1.00 37.98           O
ATOM    846  CB  HIS A 117      63.916  45.680  34.188  1.00 37.84           C
ATOM    847  CG  HIS A 117      62.799  44.792  34.649  1.00 39.00           C
ATOM    848  ND1 HIS A 117      62.196  43.871  33.819  1.00 36.22           N
ATOM    849  CD2 HIS A 117      62.189  44.673  35.852  1.00 35.01           C
ATOM    850  CE1 HIS A 117      61.255  43.226  34.492  1.00 37.29           C
ATOM    851  NE2 HIS A 117      61.234  43.693  35.728  1.00 39.15           N
ATOM    852  N   GLY A 118      67.455  46.318  34.307  1.00 32.58           N
ATOM    853  CA  GLY A 118      68.588  46.786  33.528  1.00 36.73           C
ATOM    854  C   GLY A 118      68.584  48.265  33.162  1.00 37.30           C
ATOM    855  O   GLY A 118      69.564  48.758  32.609  1.00 36.40           O
ATOM    856  N   PHE A 119      67.488  48.965  33.451  1.00 33.20           N
ATOM    857  CA  PHE A 119      67.378  50.385  33.150  1.00 34.11           C
ATOM    858  C   PHE A 119      68.100  51.212  34.203  1.00 36.57           C
ATOM    859  O   PHE A 119      67.672  51.276  35.355  1.00 34.49           O
ATOM    860  CB  PHE A 119      65.901  50.821  33.056  1.00 35.19           C
ATOM    861  CG  PHE A 119      65.107  50.067  32.019  1.00 37.53           C
ATOM    862  CD1 PHE A 119      65.238  50.367  30.671  1.00 38.76           C
ATOM    863  CD2 PHE A 119      64.234  49.050  32.394  1.00 38.76           C
ATOM    864  CE1 PHE A 119      64.519  49.664  29.711  1.00 44.43           C
ATOM    865  CE2 PHE A 119      63.500  48.338  31.438  1.00 39.18           C
ATOM    866  CZ  PHE A 119      63.635  48.648  30.098  1.00 44.43           C
ATOM    867  N   ASN A 120      69.188  51.861  33.793  1.00 36.24           N
ATOM    868  CA  ASN A 120      70.056  52.596  34.716  1.00 38.26           C
ATOM    869  C   ASN A 120      69.467  53.940  35.156  1.00 37.09           C
ATOM    870  O   ASN A 120      70.081  54.984  34.967  1.00 36.26           O
ATOM    871  CB  ASN A 120      71.430  52.815  34.068  1.00 34.89           C
ATOM    872  CG  ASN A 120      72.468  53.373  35.033  1.00 36.20           C
ATOM    873  OD1 ASN A 120      72.265  53.398  36.245  1.00 38.10           O
ATOM    874  ND2 ASN A 120      73.592  53.823  34.492  1.00 42.17           N
ATOM    875  N   ILE A 121      68.288  53.912  35.765  1.00 38.06           N
ATOM    876  CA  ILE A 121      67.691  55.145  36.288  1.00 37.05           C
ATOM    877  C   ILE A 121      68.599  55.771  37.336  1.00 37.90           C
ATOM    878  O   ILE A 121      69.251  55.061  38.103  1.00 33.92           O
ATOM    879  CB  ILE A 121      66.299  54.894  36.897  1.00 33.84           C
ATOM    880  CG1 ILE A 121      65.804  56.146  37.638  1.00 37.68           C
ATOM    881  CG2 ILE A 121      66.330  53.657  37.811  1.00 33.02           C
ATOM    882  CD1 ILE A 121      64.345  56.089  38.073  1.00 39.63           C
ATOM    883  N   SER A 122      68.659  57.101  37.347  1.00 36.61           N
ATOM    884  CA  SER A 122      69.523  57.825  38.268  1.00 36.23           C
ATOM    885  C   SER A 122      69.067  57.736  39.718  1.00 36.14           C
ATOM    886  O   SER A 122      67.879  57.835  40.001  1.00 37.98           O
ATOM    887  CB  SER A 122      69.603  59.302  37.869  1.00 38.78           C
ATOM    888  OG  SER A 122      70.282  60.028  38.877  1.00 39.05           O
ATOM    889  N   PRO A 123      70.020  57.602  40.649  1.00 36.74           N
ATOM    890  CA  PRO A 123      69.679  57.636  42.076  1.00 35.72           C
ATOM    891  C   PRO A 123      69.275  59.037  42.571  1.00 41.59           C
ATOM    892  O   PRO A 123      68.895  59.208  43.739  1.00 38.19           O
ATOM    893  CB  PRO A 123      70.969  57.168  42.754  1.00 39.29           C
ATOM    894  CG  PRO A 123      72.070  57.590  41.803  1.00 37.96           C
ATOM    895  CD  PRO A 123      71.470  57.446  40.417  1.00 38.71           C
ATOM    896  N   GLU A 124      69.340  60.033  41.693  1.00 43.05           N
ATOM    897  CA  GLU A 124      69.017  61.400  42.096  1.00 43.90           C
ATOM    898  C   GLU A 124      67.523  61.550  42.369  1.00 43.31           C
ATOM    899  O   GLU A 124      67.085  62.539  42.959  1.00 40.41           O
ATOM    900  CB  GLU A 124      69.473  62.405  41.030  1.00 46.27           C
ATOM    901  CG  GLU A 124      70.993  62.485  40.868  1.00 48.37           C
ATOM    902  CD  GLU A 124      71.677  63.264  41.989  1.00 58.73           C
ATOM    903  OE1 GLU A 124      71.020  64.132  42.615  1.00 63.45           O
ATOM    904  OE2 GLU A 124      72.877  63.010  42.241  1.00 60.22           O
ATOM    905  N   ILE A 125      66.743  60.552  41.961  1.00 43.38           N
ATOM    906  CA  ILE A 125      65.326  60.556  42.268  1.00 39.15           C
ATOM    907  C   ILE A 125      65.133  60.635  43.786  1.00 40.54           C
ATOM    908  O   ILE A 125      64.158  61.202  44.259  1.00 39.60           O
ATOM    909  CB  ILE A 125      64.602  59.320  41.676  1.00 42.32           C
ATOM    910  CG1 ILE A 125      63.093  59.441  41.891  1.00 44.77           C
ATOM    911  CG2 ILE A 125      65.142  58.005  42.252  1.00 36.69           C
ATOM    912  CD1 ILE A 125      62.282  58.391  41.172  1.00 39.33           C
ATOM    913  N   PHE A 126      66.090  60.119  44.550  1.00 38.64           N
ATOM    914  CA  PHE A 126      65.959  60.124  46.003  1.00 40.06           C
ATOM    915  C   PHE A 126      66.377  61.439  46.675  1.00 41.27           C
ATOM    916  O   PHE A 126      66.183  61.593  47.883  1.00 39.85           O
ATOM    917  CB  PHE A 126      66.765  58.968  46.616  1.00 35.45           C
ATOM    918  CG  PHE A 126      66.264  57.591  46.221  1.00 36.05           C
ATOM    919  CD1 PHE A 126      65.120  57.059  46.801  1.00 37.59           C
ATOM    920  CD2 PHE A 126      66.945  56.830  45.276  1.00 34.34           C
ATOM    921  CE1 PHE A 126      64.655  55.795  46.442  1.00 36.05           C
ATOM    922  CE2 PHE A 126      66.486  55.562  44.908  1.00 37.28           C
ATOM    923  CZ  PHE A 126      65.346  55.044  45.491  1.00 31.94           C
ATOM    924  N   SER A 127      66.958  62.372  45.917  1.00 40.97           N
ATOM    925  CA  SER A 127      67.461  63.627  46.501  1.00 45.51           C
ATOM    926  C   SER A 127      66.399  64.453  47.233  1.00 40.39           C
ATOM    927  O   SER A 127      66.635  64.908  48.353  1.00 41.29           O
ATOM    928  CB  SER A 127      68.119  64.495  45.429  1.00 45.79           C
ATOM    929  OG  SER A 127      69.469  64.092  45.259  1.00 60.00           O
ATOM    930  N   LYS A 128      65.233  64.626  46.616  1.00 36.27           N
ATOM    931  CA  LYS A 128      64.117  65.318  47.273  1.00 41.24           C
ATOM    932  C   LYS A 128      63.684  64.685  48.607  1.00 46.04           C
ATOM    933  O   LYS A 128      62.908  65.284  49.338  1.00 45.52           O
ATOM    934  CB  LYS A 128      62.905  65.378  46.342  1.00 37.21           C
ATOM    935  CG  LYS A 128      62.130  64.078  46.271  1.00 43.50           C
ATOM    936  CD  LYS A 128      60.861  64.208  45.438  1.00 47.41           C
ATOM    937  CE  LYS A 128      61.185  64.495  43.981  1.00 54.09           C
ATOM    938  NZ  LYS A 128      62.128  63.495  43.405  1.00 56.40           N
ATOM    939  N   PHE A 129      64.172  63.489  48.934  1.00 40.72           N
ATOM    940  CA  PHE A 129      63.787  62.858  50.199  1.00 41.99           C
ATOM    941  C   PHE A 129      64.888  62.956  51.239  1.00 41.35           C
ATOM    942  O   PHE A 129      64.768  62.401  52.334  1.00 43.19           O
ATOM    943  CB  PHE A 129      63.393  61.388  49.976  1.00 37.28           C
ATOM    944  CG  PHE A 129      62.289  61.218  48.973  1.00 35.50           C
ATOM    945  CD1 PHE A 129      60.999  61.604  49.280  1.00 38.68           C
ATOM    946  CD2 PHE A 129      62.548  60.712  47.712  1.00 34.86           C
ATOM    947  CE1 PHE A 129      59.978  61.472  48.349  1.00 39.73           C
ATOM    948  CE2 PHE A 129      61.539  60.576  46.781  1.00 37.51           C
ATOM    949  CZ  PHE A 129      60.247  60.952  47.100  1.00 41.38           C
ATOM    950  N   GLN A 130      65.955  63.671  50.899  1.00 41.90           N
ATOM    951  CA  GLN A 130      67.115  63.805  51.783  1.00 47.11           C
ATOM    952  C   GLN A 130      67.398  65.254  52.178  1.00 51.36           C
ATOM    953  O   GLN A 130      66.984  66.190  51.486  1.00 47.11           O
ATOM    954  CB  GLN A 130      68.352  63.219  51.114  1.00 49.00           C
ATOM    955  CG  GLN A 130      68.254  61.732  50.834  1.00 47.27           C
ATOM    956  CD  GLN A 130      69.502  61.200  50.163  1.00 51.35           C
ATOM    957  OE1 GLN A 130      70.184  61.927  49.441  1.00 57.24           O
ATOM    958  NE2 GLN A 130      69.819  59.934  50.410  1.00 42.82           N
ATOM    959  N   ASP A 131      68.108  65.426  53.293  1.00 56.37           N
ATOM    960  CA  ASP A 131      68.539  66.749  53.749  1.00 63.18           C
ATOM    961  C   ASP A 131      69.848  67.194  53.085  1.00 68.78           C
ATOM    962  O   ASP A 131      70.120  66.847  51.935  1.00 67.11           O
ATOM    963  CB  ASP A 131      68.691  66.778  55.283  1.00 60.26           C
ATOM    964  CG  ASP A 131      69.774  65.830  55.809  1.00 68.12           C
ATOM    965  OD1 ASP A 131      70.645  65.372  55.033  1.00 71.17           O
ATOM    966  OD2 ASP A 131      69.759  65.545  57.026  1.00 70.67           O
ATOM    967  N   GLU A 132      70.653  67.942  53.840  1.00 77.20           N
ATOM    968  CA  GLU A 132      71.911  68.520  53.363  1.00 78.09           C
ATOM    969  C   GLU A 132      72.996  67.485  53.118  1.00 79.34           C
ATOM    970  O   GLU A 132      73.681  67.524  52.094  1.00 81.64           O
ATOM    971  CB  GLU A 132      72.429  69.547  54.370  1.00 82.10           C
ATOM    972  CG  GLU A 132      71.410  70.600  54.734  1.00 89.29           C
ATOM    973  CD  GLU A 132      70.726  71.172  53.514  1.00 95.75           C
ATOM    974  OE1 GLU A 132      71.438  71.649  52.604  1.00101.36           O
ATOM    975  OE2 GLU A 132      69.479  71.131  53.458  1.00100.00           O
ATOM    976  N   ASN A 133      73.153  66.569  54.072  1.00 74.79           N
ATOM    977  CA  ASN A 133      74.221  65.578  54.027  1.00 74.56           C
ATOM    978  C   ASN A 133      73.824  64.339  53.249  1.00 71.76           C
ATOM    979  O   ASN A 133      74.527  63.323  53.281  1.00 71.58           O
ATOM    980  CB  ASN A 133      74.637  65.177  55.442  1.00 73.81           C
ATOM    981  CG  ASN A 133      74.567  66.336  56.421  1.00 83.37           C
ATOM    982  OD1 ASN A 133      74.614  67.506  56.031  1.00 85.79           O
ATOM    983  ND2 ASN A 133      74.469  66.012  57.706  1.00 88.02           N
ATOM    984  N   GLY A 134      72.695  64.426  52.553  1.00 68.33           N
ATOM    985  CA  GLY A 134      72.150  63.277  51.856  1.00 62.99           C
ATOM    986  C   GLY A 134      71.752  62.191  52.834  1.00 60.81           C
ATOM    987  O   GLY A 134      71.884  60.995  52.551  1.00 62.90           O
ATOM    988  N   LYS A 135      71.292  62.604  54.009  1.00 58.98           N
ATOM    989  CA  LYS A 135      70.654  61.670  54.924  1.00 55.63           C
ATOM    990  C   LYS A 135      69.142  61.838  54.806  1.00 50.44           C
ATOM    991  O   LYS A 135      68.637  62.963  54.684  1.00 46.74           O
ATOM    992  CB  LYS A 135      71.139  61.879  56.358  1.00 55.17           C
ATOM    993  CG  LYS A 135      72.530  61.306  56.582  1.00 61.83           C
ATOM    994  CD  LYS A 135      72.995  61.428  58.024  1.00 67.47           C
ATOM    995  CE  LYS A 135      74.376  60.800  58.199  1.00 69.85           C
ATOM    996  NZ  LYS A 135      74.459  59.422  57.607  1.00 59.11           N
ATOM    997  N   PHE A 136      68.432  60.712  54.808  1.00 44.66           N
ATOM    998  CA  PHE A 136      66.995  60.716  54.574  1.00 40.72           C
ATOM    999  C   PHE A 136      66.279  61.523  55.637  1.00 34.88           C
ATOM   1000  O   PHE A 136      66.564  61.393  56.827  1.00 34.58           O
ATOM   1001  CB  PHE A 136      66.458  59.279  54.505  1.00 38.28           C
ATOM   1002  CG  PHE A 136      66.665  58.649  53.163  1.00 36.71           C
ATOM   1003  CD1 PHE A 136      65.800  58.932  52.121  1.00 34.78           C
ATOM   1004  CD2 PHE A 136      67.752  57.830  52.924  1.00 34.91           C
ATOM   1005  CE1 PHE A 136      66.000  58.396  50.872  1.00 35.71           C
ATOM   1006  CE2 PHE A 136      67.960  57.300  51.679  1.00 34.69           C
ATOM   1007  CZ  PHE A 136      67.082  57.582  50.649  1.00 35.85           C
ATOM   1008  N   LYS A 137      65.390  62.395  55.184  1.00 34.50           N
ATOM   1009  CA  LYS A 137      64.528  63.163  56.077  1.00 41.81           C
ATOM   1010  C   LYS A 137      63.786  62.244  57.030  1.00 40.97           C
ATOM   1011  O   LYS A 137      63.054  61.358  56.595  1.00 42.87           O
ATOM   1012  CB  LYS A 137      63.520  63.983  55.279  1.00 40.38           C
ATOM   1013  CG  LYS A 137      64.144  64.969  54.328  1.00 43.03           C
ATOM   1014  CD  LYS A 137      63.072  65.739  53.590  1.00 46.87           C
ATOM   1015  CE  LYS A 137      63.678  66.772  52.660  1.00 48.22           C
ATOM   1016  NZ  LYS A 137      62.621  67.515  51.911  1.00 59.56           N
ATOM   1017  N   GLU A 138      63.973  62.454  58.327  1.00 38.91           N
ATOM   1018  CA  GLU A 138      63.346  61.593  59.315  1.00 40.06           C
ATOM   1019  C   GLU A 138      61.855  61.859  59.458  1.00 43.09           C
ATOM   1020  O   GLU A 138      61.149  61.113  60.129  1.00 46.37           O
ATOM   1021  CB  GLU A 138      64.050  61.743  60.656  1.00 45.49           C
ATOM   1022  CG  GLU A 138      65.292  60.855  60.755  1.00 47.40           C
ATOM   1023  CD  GLU A 138      66.183  61.243  61.905  1.00 50.09           C
ATOM   1024  OE1 GLU A 138      66.219  62.443  62.255  1.00 53.95           O
ATOM   1025  OE2 GLU A 138      66.831  60.346  62.474  1.00 58.01           O
ATOM   1026  N   SER A 139      61.371  62.901  58.797  1.00 40.02           N
ATOM   1027  CA  SER A 139      59.943  63.165  58.749  1.00 42.05           C
ATOM   1028  C   SER A 139      59.214  62.082  57.946  1.00 43.50           C
ATOM   1029  O   SER A 139      57.991  61.966  58.019  1.00 42.26           O
ATOM   1030  CB  SER A 139      59.686  64.528  58.138  1.00 36.70           C
ATOM   1031  OG  SER A 139      60.282  64.593  56.856  1.00 40.51           O
ATOM   1032  N   LEU A 140      59.972  61.295  57.182  1.00 41.97           N
ATOM   1033  CA  LEU A 140      59.398  60.230  56.356  1.00 41.77           C
ATOM   1034  C   LEU A 140      59.210  58.949  57.152  1.00 35.69           C
ATOM   1035  O   LEU A 140      58.751  57.952  56.613  1.00 38.66           O
ATOM   1036  CB  LEU A 140      60.290  59.937  55.142  1.00 41.18           C
ATOM   1037  CG  LEU A 140      60.497  61.044  54.107  1.00 44.68           C
ATOM   1038  CD1 LEU A 140      61.720  60.748  53.234  1.00 42.58           C
ATOM   1039  CD2 LEU A 140      59.267  61.197  53.263  1.00 42.41           C
ATOM   1040  N   ALA A 141      59.585  58.976  58.426  1.00 33.93           N
ATOM   1041  CA  ALA A 141      59.595  57.779  59.258  1.00 36.21           C
ATOM   1042  C   ALA A 141      58.190  57.249  59.597  1.00 39.59           C
ATOM   1043  O   ALA A 141      58.055  56.152  60.134  1.00 39.13           O
ATOM   1044  CB  ALA A 141      60.356  58.050  60.531  1.00 34.19           C
ATOM   1045  N   SER A 142      57.160  58.031  59.304  1.00 32.39           N
ATOM   1046  CA  SER A 142      55.790  57.628  59.593  1.00 40.93           C
ATOM   1047  C   SER A 142      55.071  57.192  58.322  1.00 38.99           C
ATOM   1048  O   SER A 142      53.854  57.047  58.312  1.00 40.68           O
ATOM   1049  CB  SER A 142      55.015  58.773  60.255  1.00 36.12           C
ATOM   1050  OG  SER A 142      55.000  59.904  59.408  1.00 34.75           O
ATOM   1051  N   ASP A 143      55.832  57.011  57.250  1.00 33.91           N
ATOM   1052  CA  ASP A 143      55.288  56.568  55.969  1.00 35.51           C
ATOM   1053  C   ASP A 143      55.705  55.116  55.704  1.00 33.14           C
ATOM   1054  O   ASP A 143      56.689  54.861  54.997  1.00 33.51           O
ATOM   1055  CB  ASP A 143      55.771  57.506  54.852  1.00 30.93           C
ATOM   1056  CG  ASP A 143      55.392  57.024  53.462  1.00 33.15           C
ATOM   1057  OD1 ASP A 143      54.573  56.088  53.348  1.00 35.15           O
ATOM   1058  OD2 ASP A 143      55.904  57.597  52.476  1.00 35.88           O
ATOM   1059  N   VAL A 144      54.960  54.171  56.275  1.00 31.93           N
ATOM   1060  CA  VAL A 144      55.363  52.758  56.273  1.00 30.66           C
ATOM   1061  C   VAL A 144      55.520  52.198  54.860  1.00 30.79           C
ATOM   1062  O   VAL A 144      56.500  51.502  54.586  1.00 31.40           O
ATOM   1063  CB  VAL A 144      54.371  51.875  57.068  1.00 37.78           C
ATOM   1064  CG1 VAL A 144      54.856  50.425  57.109  1.00 36.76           C
ATOM   1065  CG2 VAL A 144      54.247  52.386  58.485  1.00 41.73           C
ATOM   1066  N   LEU A 145      54.599  52.519  53.951  1.00 28.53           N
ATOM   1067  CA  LEU A 145      54.732  52.033  52.575  1.00 28.16           C
ATOM   1068  C   LEU A 145      55.953  52.636  51.859  1.00 35.62           C
ATOM   1069  O   LEU A 145      56.612  51.954  51.053  1.00 33.56           O
ATOM   1070  CB  LEU A 145      53.465  52.309  51.778  1.00 27.13           C
ATOM   1071  CG  LEU A 145      52.217  51.566  52.295  1.00 33.09           C
ATOM   1072  CD1 LEU A 145      50.976  51.800  51.414  1.00 26.07           C
ATOM   1073  CD2 LEU A 145      52.501  50.084  52.431  1.00 29.62           C
ATOM   1074  N   GLY A 146      56.265  53.899  52.153  1.00 31.71           N
ATOM   1075  CA  GLY A 146      57.481  54.503  51.634  1.00 32.49           C
ATOM   1076  C   GLY A 146      58.720  53.777  52.141  1.00 29.95           C
ATOM   1077  O   GLY A 146      59.607  53.435  51.362  1.00 28.31           O
ATOM   1078  N   LEU A 147      58.775  53.533  53.449  1.00 29.86           N
ATOM   1079  CA  LEU A 147      59.909  52.839  54.054  1.00 26.32           C
ATOM   1080  C   LEU A 147      60.093  51.442  53.509  1.00 28.96           C
ATOM   1081  O   LEU A 147      61.237  50.979  53.321  1.00 27.62           O
ATOM   1082  CB  LEU A 147      59.744  52.759  55.566  1.00 27.65           C
ATOM   1083  CG  LEU A 147      59.704  54.108  56.278  1.00 34.57           C
ATOM   1084  CD1 LEU A 147      59.208  53.920  57.707  1.00 33.86           C
ATOM   1085  CD2 LEU A 147      61.081  54.782  56.244  1.00 28.85           C
ATOM   1086  N   LEU A 148      58.975  50.754  53.276  1.00 26.92           N
ATOM   1087  CA  LEU A 148      59.046  49.380  52.806  1.00 29.57           C
ATOM   1088  C   LEU A 148      59.681  49.349  51.427  1.00 29.13           C
ATOM   1089  O   LEU A 148      60.586  48.556  51.164  1.00 30.25           O
ATOM   1090  CB  LEU A 148      57.657  48.721  52.768  1.00 26.87           C
ATOM   1091  CG  LEU A 148      57.612  47.267  52.298  1.00 25.54           C
ATOM   1092  CD1 LEU A 148      58.640  46.448  53.050  1.00 26.05           C
ATOM   1093  CD2 LEU A 148      56.236  46.678  52.520  1.00 25.76           C
ATOM   1094  N   ASN A 149      59.205  50.214  50.547  1.00 26.44           N
ATOM   1095  CA  ASN A 149      59.712  50.214  49.191  1.00 28.80           C
ATOM   1096  C   ASN A 149      61.145  50.743  49.110  1.00 29.63           C
ATOM   1097  O   ASN A 149      61.942  50.260  48.308  1.00 27.94           O
ATOM   1098  CB  ASN A 149      58.785  51.013  48.285  1.00 27.85           C
ATOM   1099  CG  ASN A 149      57.581  50.208  47.870  1.00 34.37           C
ATOM   1100  OD1 ASN A 149      57.573  49.604  46.806  1.00 36.96           O
ATOM   1101  ND2 ASN A 149      56.544  50.222  48.692  1.00 39.83           N
ATOM   1102  N   LEU A 150      61.461  51.715  49.960  1.00 29.30           N
ATOM   1103  CA  LEU A 150      62.834  52.199  50.092  1.00 30.88           C
ATOM   1104  C   LEU A 150      63.732  51.054  50.551  1.00 31.48           C
ATOM   1105  O   LEU A 150      64.856  50.898  50.053  1.00 30.26           O
ATOM   1106  CB  LEU A 150      62.923  53.368  51.078  1.00 25.42           C
ATOM   1107  CG  LEU A 150      64.341  53.915  51.310  1.00 34.03           C
ATOM   1108  CD1 LEU A 150      64.948  54.466  50.014  1.00 27.79           C
ATOM   1109  CD2 LEU A 150      64.338  54.978  52.404  1.00 31.01           C
ATOM   1110  N   TYR A 151      63.229  50.252  51.491  1.00 30.62           N
ATOM   1111  CA  TYR A 151      63.998  49.130  52.033  1.00 29.19           C
ATOM   1112  C   TYR A 151      64.320  48.132  50.934  1.00 30.14           C
ATOM   1113  O   TYR A 151      65.471  47.700  50.810  1.00 27.88           O
ATOM   1114  CB  TYR A 151      63.242  48.436  53.164  1.00 29.51           C
ATOM   1115  CG  TYR A 151      63.818  47.101  53.584  1.00 28.82           C
ATOM   1116  CD1 TYR A 151      64.757  47.021  54.609  1.00 25.46           C
ATOM   1117  CD2 TYR A 151      63.405  45.915  52.972  1.00 27.34           C
ATOM   1118  CE1 TYR A 151      65.276  45.812  55.001  1.00 26.61           C
ATOM   1119  CE2 TYR A 151      63.931  44.692  53.356  1.00 25.94           C
ATOM   1120  CZ  TYR A 151      64.860  44.651  54.371  1.00 27.43           C
ATOM   1121  OH  TYR A 151      65.382  43.452  54.757  1.00 28.82           O
ATOM   1122  N   GLU A 152      63.313  47.769  50.137  1.00 26.47           N
ATOM   1123  CA  GLU A 152      63.533  46.819  49.052  1.00 27.08           C
ATOM   1124  C   GLU A 152      64.491  47.399  48.000  1.00 31.53           C
ATOM   1125  O   GLU A 152      65.374  46.690  47.501  1.00 28.45           O
ATOM   1126  CB  GLU A 152      62.208  46.405  48.402  1.00 29.37           C
ATOM   1127  CG  GLU A 152      61.199  45.705  49.358  1.00 29.42           C
ATOM   1128  CD  GLU A 152      61.582  44.261  49.743  1.00 32.82           C
ATOM   1129  OE1 GLU A 152      62.694  43.792  49.408  1.00 30.71           O
ATOM   1130  OE2 GLU A 152      60.766  43.595  50.417  1.00 34.38           O
ATOM   1131  N   ALA A 153      64.330  48.685  47.689  1.00 28.70           N
ATOM   1132  CA  ALA A 153      65.193  49.381  46.737  1.00 27.24           C
ATOM   1133  C   ALA A 153      66.651  49.401  47.186  1.00 27.16           C
ATOM   1134  O   ALA A 153      67.553  49.291  46.365  1.00 26.93           O
ATOM   1135  CB  ALA A 153      64.702  50.816  46.522  1.00 28.47           C
ATOM   1136  N   SER A 154      66.872  49.534  48.492  1.00 28.68           N
ATOM   1137  CA  SER A 154      68.221  49.680  49.047  1.00 28.38           C
ATOM   1138  C   SER A 154      69.112  48.489  48.713  1.00 31.20           C
ATOM   1139  O   SER A 154      70.339  48.578  48.814  1.00 34.21           O
ATOM   1140  CB  SER A 154      68.163  49.858  50.567  1.00 27.38           C
ATOM   1141  OG  SER A 154      68.101  48.597  51.226  1.00 28.23           O
ATOM   1142  N   HIS A 155      68.495  47.377  48.316  1.00 28.98           N
ATOM   1143  CA  HIS A 155      69.243  46.161  48.015  1.00 29.06           C
ATOM   1144  C   HIS A 155      69.700  46.061  46.550  1.00 27.14           C
ATOM   1145  O   HIS A 155      70.430  45.150  46.204  1.00 25.49           O
ATOM   1146  CB  HIS A 155      68.400  44.934  48.408  1.00 26.82           C
ATOM   1147  CG  HIS A 155      68.193  44.822  49.885  1.00 24.70           C
ATOM   1148  ND1 HIS A 155      69.155  44.321  50.733  1.00 26.57           N
ATOM   1149  CD2 HIS A 155      67.164  45.215  50.672  1.00 27.67           C
ATOM   1150  CE1 HIS A 155      68.721  44.391  51.980  1.00 29.21           C
ATOM   1151  NE2 HIS A 155      67.515  44.933  51.969  1.00 31.89           N
ATOM   1152  N   VAL A 156      69.292  46.997  45.694  1.00 27.69           N
ATOM   1153  CA  VAL A 156      69.712  46.937  44.293  1.00 29.09           C
ATOM   1154  C   VAL A 156      70.770  48.007  43.955  1.00 31.51           C
ATOM   1155  O   VAL A 156      70.925  48.412  42.796  1.00 34.47           O
ATOM   1156  CB  VAL A 156      68.510  47.083  43.336  1.00 26.06           C
ATOM   1157  CG1 VAL A 156      67.387  46.146  43.755  1.00 27.00           C
ATOM   1158  CG2 VAL A 156      68.005  48.523  43.337  1.00 35.52           C
ATOM   1159  N   ARG A 157      71.523  48.453  44.952  1.00 32.35           N
ATOM   1160  CA  ARG A 157      72.542  49.484  44.694  1.00 33.07           C
ATOM   1161  C   ARG A 157      73.706  48.973  43.853  1.00 32.50           C
ATOM   1162  O   ARG A 157      74.047  47.775  43.887  1.00 31.06           O
ATOM   1163  CB  ARG A 157      73.094  50.037  46.004  1.00 33.98           C
ATOM   1164  CG  ARG A 157      72.148  50.954  46.752  1.00 32.74           C
ATOM   1165  CD  ARG A 157      72.642  51.114  48.182  1.00 38.58           C
ATOM   1166  NE  ARG A 157      73.984  51.698  48.242  1.00 42.92           N
ATOM   1167  CZ  ARG A 157      74.826  51.523  49.257  1.00 43.24           C
ATOM   1168  NH1 ARG A 157      74.464  50.773  50.289  1.00 36.85           N
ATOM   1169  NH2 ARG A 157      76.028  52.092  49.241  1.00 42.90           N
ATOM   1170  N   THR A 158      74.295  49.888  43.084  1.00 33.27           N
ATOM   1171  CA  THR A 158      75.608  49.691  42.451  1.00 31.23           C
ATOM   1172  C   THR A 158      76.636  50.550  43.188  1.00 33.96           C
ATOM   1173  O   THR A 158      76.316  51.143  44.217  1.00 36.30           O
ATOM   1174  CB  THR A 158      75.607  50.086  40.953  1.00 33.55           C
ATOM   1175  OG1 THR A 158      75.485  51.512  40.819  1.00 33.11           O
ATOM   1176  CG2 THR A 158      74.468  49.419  40.212  1.00 29.59           C
ATOM   1177  N   HIS A 159      77.857  50.638  42.663  1.00 33.87           N
ATOM   1178  CA  HIS A 159      78.883  51.501  43.265  1.00 35.00           C
ATOM   1179  C   HIS A 159      78.640  52.980  42.987  1.00 34.19           C
ATOM   1180  O   HIS A 159      79.129  53.842  43.710  1.00 38.06           O
ATOM   1181  CB  HIS A 159      80.278  51.091  42.781  1.00 36.41           C
ATOM   1182  CG  HIS A 159      80.716  49.769  43.317  1.00 34.15           C
ATOM   1183  ND1 HIS A 159      81.214  49.614  44.594  1.00 35.20           N
ATOM   1184  CD2 HIS A 159      80.686  48.528  42.766  1.00 34.25           C
ATOM   1185  CE1 HIS A 159      81.491  48.336  44.799  1.00 33.34           C
ATOM   1186  NE2 HIS A 159      81.172  47.656  43.710  1.00 28.47           N
ATOM   1187  N   ALA A 160      77.856  53.265  41.954  1.00 35.91           N
ATOM   1188  CA  ALA A 160      77.468  54.632  41.622  1.00 36.59           C
ATOM   1189  C   ALA A 160      76.338  55.181  42.499  1.00 38.63           C
ATOM   1190  O   ALA A 160      75.858  56.291  42.262  1.00 40.99           O
ATOM   1191  CB  ALA A 160      77.053  54.704  40.166  1.00 37.59           C
ATOM   1192  N   ASP A 161      75.929  54.425  43.518  1.00 37.11           N
ATOM   1193  CA  ASP A 161      74.694  54.733  44.246  1.00 35.55           C
ATOM   1194  C   ASP A 161      74.880  55.065  45.715  1.00 37.42           C
ATOM   1195  O   ASP A 161      74.022  54.734  46.526  1.00 37.69           O
ATOM   1196  CB  ASP A 161      73.721  53.553  44.139  1.00 33.67           C
ATOM   1197  CG  ASP A 161      73.201  53.364  42.746  1.00 33.23           C
ATOM   1198  OD1 ASP A 161      72.881  54.375  42.091  1.00 34.70           O
ATOM   1199  OD2 ASP A 161      73.109  52.211  42.290  1.00 34.17           O
ATOM   1200  N   ASP A 162      75.980  55.724  46.058  1.00 38.74           N
ATOM   1201  CA  ASP A 162      76.278  56.077  47.450  1.00 39.67           C
ATOM   1202  C   ASP A 162      75.287  57.077  48.050  1.00 42.68           C
ATOM   1203  O   ASP A 162      75.258  57.262  49.265  1.00 45.70           O
ATOM   1204  CB  ASP A 162      77.698  56.650  47.570  1.00 44.76           C
ATOM   1205  CG  ASP A 162      78.778  55.607  47.330  1.00 45.98           C
ATOM   1206  OD1 ASP A 162      78.497  54.394  47.456  1.00 44.78           O
ATOM   1207  OD2 ASP A 162      79.915  56.011  47.020  1.00 54.40           O
ATOM   1208  N   ILE A 163      74.485  57.726  47.211  1.00 40.03           N
ATOM   1209  CA  ILE A 163      73.365  58.537  47.707  1.00 46.08           C
ATOM   1210  C   ILE A 163      72.418  57.689  48.570  1.00 48.94           C
ATOM   1211  O   ILE A 163      71.751  58.208  49.475  1.00 47.85           O
ATOM   1212  CB  ILE A 163      72.564  59.185  46.542  1.00 50.59           C
ATOM   1213  CG1 ILE A 163      73.398  60.266  45.856  1.00 52.02           C
ATOM   1214  CG2 ILE A 163      71.280  59.855  47.032  1.00 52.29           C
ATOM   1215  CD1 ILE A 163      72.641  61.002  44.766  1.00 51.64           C
ATOM   1216  N   LEU A 164      72.391  56.381  48.310  1.00 41.36           N
ATOM   1217  CA  LEU A 164      71.490  55.475  49.014  1.00 39.21           C
ATOM   1218  C   LEU A 164      72.162  54.763  50.176  1.00 42.12           C
ATOM   1219  O   LEU A 164      71.608  53.788  50.703  1.00 39.95           O
ATOM   1220  CB  LEU A 164      70.929  54.416  48.060  1.00 39.50           C
ATOM   1221  CG  LEU A 164      69.869  54.754  47.004  1.00 44.15           C
ATOM   1222  CD1 LEU A 164      70.433  55.657  45.927  1.00 44.16           C
ATOM   1223  CD2 LEU A 164      69.358  53.478  46.374  1.00 39.24           C
ATOM   1224  N   GLU A 165      73.350  55.218  50.567  1.00 38.93           N
ATOM   1225  CA  GLU A 165      74.149  54.472  51.545  1.00 43.72           C
ATOM   1226  C   GLU A 165      73.442  54.386  52.901  1.00 37.99           C
ATOM   1227  O   GLU A 165      73.678  53.463  53.680  1.00 37.80           O
ATOM   1228  CB  GLU A 165      75.545  55.105  51.709  1.00 43.41           C
ATOM   1229  CG  GLU A 165      75.656  56.142  52.829  1.00 45.59           C
ATOM   1230  CD  GLU A 165      76.869  57.073  52.675  1.00 60.18           C
ATOM   1231  OE1 GLU A 165      76.676  58.208  52.181  1.00 63.78           O
ATOM   1232  OE2 GLU A 165      78.007  56.672  53.037  1.00 59.73           O
ATOM   1233  N   ASP A 166      72.571  55.355  53.161  1.00 36.02           N
ATOM   1234  CA  ASP A 166      71.831  55.454  54.417  1.00 41.51           C
ATOM   1235  C   ASP A 166      70.460  54.707  54.375  1.00 39.37           C
ATOM   1236  O   ASP A 166      69.868  54.431  55.419  1.00 35.83           O
ATOM   1237  CB  ASP A 166      71.632  56.948  54.749  1.00 42.74           C
ATOM   1238  CG  ASP A 166      70.919  57.188  56.088  1.00 51.69           C
ATOM   1239  OD1 ASP A 166      71.215  56.459  57.063  1.00 53.87           O
ATOM   1240  OD2 ASP A 166      70.073  58.121  56.161  1.00 48.88           O
ATOM   1241  N   ALA A 167      69.971  54.390  53.173  1.00 35.35           N
ATOM   1242  CA  ALA A 167      68.607  53.861  52.984  1.00 33.85           C
ATOM   1243  C   ALA A 167      68.317  52.582  53.775  1.00 31.61           C
ATOM   1244  O   ALA A 167      67.286  52.478  54.418  1.00 32.18           O
ATOM   1245  CB  ALA A 167      68.340  53.612  51.503  1.00 30.34           C
ATOM   1246  N   LEU A 168      69.229  51.615  53.738  1.00 30.87           N
ATOM   1247  CA  LEU A 168      68.996  50.355  54.430  1.00 30.77           C
ATOM   1248  C   LEU A 168      68.825  50.534  55.936  1.00 33.00           C
ATOM   1249  O   LEU A 168      67.859  50.044  56.519  1.00 33.70           O
ATOM   1250  CB  LEU A 168      70.124  49.367  54.150  1.00 26.77           C
ATOM   1251  CG  LEU A 168      69.919  47.994  54.800  1.00 32.56           C
ATOM   1252  CD1 LEU A 168      68.557  47.415  54.434  1.00 26.93           C
ATOM   1253  CD2 LEU A 168      71.049  47.031  54.419  1.00 33.00           C
ATOM   1254  N   ALA A 169      69.758  51.237  56.560  1.00 34.22           N
ATOM   1255  CA  ALA A 169      69.706  51.501  57.999  1.00 36.84           C
ATOM   1256  C   ALA A 169      68.487  52.316  58.402  1.00 34.35           C
ATOM   1257  O   ALA A 169      67.866  52.030  59.418  1.00 37.53           O
ATOM   1258  CB  ALA A 169      70.989  52.225  58.459  1.00 33.12           C
ATOM   1259  N   PHE A 170      68.165  53.335  57.608  1.00 33.67           N
ATOM   1260  CA  PHE A 170      67.049  54.245  57.878  1.00 33.30           C
ATOM   1261  C   PHE A 170      65.704  53.525  57.832  1.00 37.71           C
ATOM   1262  O   PHE A 170      64.901  53.612  58.768  1.00 35.84           O
ATOM   1263  CB  PHE A 170      67.058  55.386  56.862  1.00 32.45           C
ATOM   1264  CG  PHE A 170      65.910  56.343  57.001  1.00 34.14           C
ATOM   1265  CD1 PHE A 170      65.891  57.289  58.019  1.00 34.87           C
ATOM   1266  CD2 PHE A 170      64.862  56.321  56.089  1.00 35.34           C
ATOM   1267  CE1 PHE A 170      64.851  58.174  58.141  1.00 36.93           C
ATOM   1268  CE2 PHE A 170      63.809  57.206  56.200  1.00 29.81           C
ATOM   1269  CZ  PHE A 170      63.797  58.136  57.232  1.00 37.10           C
ATOM   1270  N   SER A 171      65.457  52.825  56.729  1.00 34.00           N
ATOM   1271  CA  SER A 171      64.199  52.124  56.558  1.00 35.00           C
ATOM   1272  C   SER A 171      64.091  50.986  57.573  1.00 31.45           C
ATOM   1273  O   SER A 171      63.032  50.763  58.139  1.00 34.63           O
ATOM   1274  CB  SER A 171      64.068  51.605  55.129  1.00 29.85           C
ATOM   1275  OG  SER A 171      65.103  50.690  54.836  1.00 29.71           O
ATOM   1276  N   THR A 172      65.193  50.300  57.839  1.00 31.32           N
ATOM   1277  CA  THR A 172      65.179  49.170  58.778  1.00 31.98           C
ATOM   1278  C   THR A 172      64.776  49.594  60.190  1.00 34.50           C
ATOM   1279  O   THR A 172      63.891  48.982  60.792  1.00 36.78           O
ATOM   1280  CB  THR A 172      66.551  48.465  58.828  1.00 29.68           C
ATOM   1281  OG1 THR A 172      66.803  47.825  57.571  1.00 30.65           O
ATOM   1282  CG2 THR A 172      66.594  47.413  59.923  1.00 30.14           C
ATOM   1283  N   ILE A 173      65.410  50.642  60.708  1.00 32.42           N
ATOM   1284  CA  ILE A 173      65.132  51.140  62.053  1.00 32.71           C
ATOM   1285  C   ILE A 173      63.658  51.472  62.250  1.00 34.62           C
ATOM   1286  O   ILE A 173      63.070  51.181  63.292  1.00 35.87           O
ATOM   1287  CB  ILE A 173      65.961  52.397  62.360  1.00 39.70           C
ATOM   1288  CG1 ILE A 173      67.441  52.042  62.475  1.00 45.55           C
ATOM   1289  CG2 ILE A 173      65.508  53.050  63.649  1.00 40.69           C
ATOM   1290  CD1 ILE A 173      68.368  53.267  62.365  1.00 52.08           C
ATOM   1291  N   HIS A 174      63.051  52.060  61.231  1.00 28.97           N
ATOM   1292  CA  HIS A 174      61.700  52.552  61.383  1.00 35.52           C
ATOM   1293  C   HIS A 174      60.640  51.515  61.012  1.00 33.28           C
ATOM   1294  O   HIS A 174      59.549  51.550  61.549  1.00 33.17           O
ATOM   1295  CB  HIS A 174      61.525  53.818  60.563  1.00 34.17           C
ATOM   1296  CG  HIS A 174      62.361  54.954  61.057  1.00 36.00           C
ATOM   1297  ND1 HIS A 174      62.249  55.451  62.333  1.00 38.71           N
ATOM   1298  CD2 HIS A 174      63.335  55.672  60.448  1.00 35.22           C
ATOM   1299  CE1 HIS A 174      63.110  56.446  62.490  1.00 40.25           C
ATOM   1300  NE2 HIS A 174      63.774  56.600  61.362  1.00 39.78           N
ATOM   1301  N   LEU A 175      60.965  50.595  60.108  1.00 32.36           N
ATOM   1302  CA  LEU A 175      60.077  49.474  59.847  1.00 32.12           C
ATOM   1303  C   LEU A 175      60.022  48.614  61.094  1.00 34.08           C
ATOM   1304  O   LEU A 175      58.945  48.169  61.495  1.00 31.93           O
ATOM   1305  CB  LEU A 175      60.539  48.662  58.639  1.00 26.93           C
ATOM   1306  CG  LEU A 175      60.260  49.356  57.305  1.00 28.68           C
ATOM   1307  CD1 LEU A 175      60.959  48.636  56.165  1.00 26.90           C
ATOM   1308  CD2 LEU A 175      58.757  49.474  57.046  1.00 24.98           C
ATOM   1309  N   GLU A 176      61.181  48.392  61.718  1.00 31.36           N
ATOM   1310  CA  GLU A 176      61.220  47.647  62.974  1.00 35.44           C
ATOM   1311  C   GLU A 176      60.269  48.248  64.005  1.00 34.59           C
ATOM   1312  O   GLU A 176      59.508  47.539  64.661  1.00 36.54           O
ATOM   1313  CB  GLU A 176      62.634  47.613  63.545  1.00 36.14           C
ATOM   1314  CG  GLU A 176      63.456  46.445  63.086  1.00 39.13           C
ATOM   1315  CD  GLU A 176      64.920  46.573  63.485  1.00 50.26           C
ATOM   1316  OE1 GLU A 176      65.324  47.640  64.036  1.00 47.76           O
ATOM   1317  OE2 GLU A 176      65.667  45.594  63.249  1.00 56.22           O
ATOM   1318  N   SER A 177      60.316  49.565  64.124  1.00 31.86           N
ATOM   1319  CA  SER A 177      59.579  50.273  65.151  1.00 34.04           C
ATOM   1320  C   SER A 177      58.080  50.248  64.888  1.00 34.06           C
ATOM   1321  O   SER A 177      57.276  50.144  65.821  1.00 37.36           O
ATOM   1322  CB  SER A 177      60.083  51.718  65.243  1.00 39.17           C
ATOM   1323  OG  SER A 177      59.706  52.308  66.472  1.00 46.28           O
ATOM   1324  N   ALA A 178      57.701  50.337  63.618  1.00 30.60           N
ATOM   1325  CA  ALA A 178      56.293  50.424  63.259  1.00 33.99           C
ATOM   1326  C   ALA A 178      55.620  49.055  63.269  1.00 37.24           C
ATOM   1327  O   ALA A 178      54.437  48.937  63.608  1.00 32.41           O
ATOM   1328  CB  ALA A 178      56.136  51.065  61.897  1.00 33.25           C
ATOM   1329  N   ALA A 179      56.389  48.029  62.909  1.00 32.41           N
ATOM   1330  CA  ALA A 179      55.853  46.704  62.627  1.00 31.51           C
ATOM   1331  C   ALA A 179      54.762  46.188  63.586  1.00 32.44           C
ATOM   1332  O   ALA A 179      53.731  45.730  63.121  1.00 32.25           O
ATOM   1333  CB  ALA A 179      57.003  45.689  62.569  1.00 30.76           C
ATOM   1334  N   PRO A 180      54.979  46.247  64.916  1.00 32.72           N
ATOM   1335  CA  PRO A 180      54.028  45.536  65.781  1.00 30.92           C
ATOM   1336  C   PRO A 180      52.599  46.103  65.782  1.00 34.00           C
ATOM   1337  O   PRO A 180      51.683  45.419  66.226  1.00 35.47           O
ATOM   1338  CB  PRO A 180      54.653  45.686  67.174  1.00 31.71           C
ATOM   1339  CG  PRO A 180      56.074  46.029  66.934  1.00 32.37           C
ATOM   1340  CD  PRO A 180      56.069  46.848  65.702  1.00 32.93           C
ATOM   1341  N   HIS A 181      52.411  47.319  65.286  1.00 30.21           N
ATOM   1342  CA  HIS A 181      51.093  47.945  65.333  1.00 35.62           C
ATOM   1343  C   HIS A 181      50.489  48.045  63.950  1.00 31.63           C
ATOM   1344  O   HIS A 181      49.485  48.707  63.759  1.00 34.92           O
ATOM   1345  CB  HIS A 181      51.191  49.329  65.981  1.00 37.70           C
ATOM   1346  CG  HIS A 181      51.993  49.331  67.246  1.00 34.74           C
ATOM   1347  ND1 HIS A 181      51.575  48.687  68.393  1.00 39.10           N
ATOM   1348  CD2 HIS A 181      53.207  49.857  67.528  1.00 34.72           C
ATOM   1349  CE1 HIS A 181      52.495  48.827  69.333  1.00 35.72           C
ATOM   1350  NE2 HIS A 181      53.493  49.536  68.835  1.00 36.89           N
ATOM   1351  N   LEU A 182      51.094  47.373  62.978  1.00 31.37           N
ATOM   1352  CA  LEU A 182      50.557  47.412  61.617  1.00 34.21           C
ATOM   1353  C   LEU A 182      49.390  46.421  61.434  1.00 31.93           C
ATOM   1354  O   LEU A 182      49.341  45.389  62.094  1.00 32.29           O
ATOM   1355  CB  LEU A 182      51.671  47.126  60.601  1.00 30.93           C
ATOM   1356  CG  LEU A 182      52.849  48.124  60.574  1.00 31.04           C
ATOM   1357  CD1 LEU A 182      53.867  47.728  59.527  1.00 26.98           C
ATOM   1358  CD2 LEU A 182      52.355  49.536  60.327  1.00 31.44           C
ATOM   1359  N   LYS A 183      48.458  46.738  60.540  1.00 31.50           N
ATOM   1360  CA  LYS A 183      47.396  45.792  60.204  1.00 33.40           C
ATOM   1361  C   LYS A 183      47.989  44.623  59.431  1.00 33.57           C
ATOM   1362  O   LYS A 183      49.123  44.713  58.947  1.00 30.35           O
ATOM   1363  CB  LYS A 183      46.300  46.459  59.377  1.00 32.56           C
ATOM   1364  CG  LYS A 183      46.825  47.070  58.086  1.00 34.65           C
ATOM   1365  CD  LYS A 183      45.699  47.569  57.203  1.00 37.92           C
ATOM   1366  CE  LYS A 183      46.257  48.249  55.959  1.00 42.92           C
ATOM   1367  NZ  LYS A 183      45.184  48.650  54.996  1.00 49.59           N
ATOM   1368  N   SER A 184      47.227  43.532  59.334  1.00 32.82           N
ATOM   1369  CA  SER A 184      47.600  42.357  58.541  1.00 32.89           C
ATOM   1370  C   SER A 184      46.937  42.440  57.169  1.00 32.30           C
ATOM   1371  O   SER A 184      45.838  42.946  57.051  1.00 32.44           O
ATOM   1372  CB  SER A 184      47.191  41.062  59.259  1.00 32.45           C
ATOM   1373  OG  SER A 184      47.972  40.880  60.431  1.00 38.75           O
ATOM   1374  N   PRO A 185      47.604  41.936  56.122  1.00 33.49           N
ATOM   1375  CA  PRO A 185      48.887  41.230  56.191  1.00 32.95           C
ATOM   1376  C   PRO A 185      50.122  42.115  56.027  1.00 34.56           C
ATOM   1377  O   PRO A 185      51.226  41.563  55.911  1.00 33.02           O
ATOM   1378  CB  PRO A 185      48.785  40.243  55.028  1.00 32.90           C
ATOM   1379  CG  PRO A 185      47.996  41.013  53.999  1.00 34.29           C
ATOM   1380  CD  PRO A 185      46.998  41.848  54.779  1.00 31.61           C
ATOM   1381  N   LEU A 186      49.961  43.438  56.018  1.00 32.89           N
ATOM   1382  CA  LEU A 186      51.116  44.329  55.877  1.00 32.81           C
ATOM   1383  C   LEU A 186      52.177  44.026  56.939  1.00 30.02           C
ATOM   1384  O   LEU A 186      53.375  44.041  56.641  1.00 29.98           O
ATOM   1385  CB  LEU A 186      50.694  45.815  55.948  1.00 27.50           C
ATOM   1386  CG  LEU A 186      51.828  46.861  55.816  1.00 29.55           C
ATOM   1387  CD1 LEU A 186      52.487  46.806  54.448  1.00 27.61           C
ATOM   1388  CD2 LEU A 186      51.345  48.284  56.081  1.00 33.74           C
ATOM   1389  N   ARG A 187      51.743  43.747  58.170  1.00 29.55           N
ATOM   1390  CA  ARG A 187      52.685  43.520  59.264  1.00 28.57           C
ATOM   1391  C   ARG A 187      53.573  42.326  58.949  1.00 33.84           C
ATOM   1392  O   ARG A 187      54.790  42.342  59.229  1.00 30.39           O
ATOM   1393  CB  ARG A 187      51.976  43.282  60.604  1.00 32.35           C
ATOM   1394  CG  ARG A 187      52.971  42.974  61.738  1.00 33.87           C
ATOM   1395  CD  ARG A 187      52.343  42.837  63.105  1.00 33.06           C
ATOM   1396  NE  ARG A 187      51.420  41.707  63.148  1.00 45.42           N
ATOM   1397  CZ  ARG A 187      50.472  41.540  64.071  1.00 53.84           C
ATOM   1398  NH1 ARG A 187      49.673  40.478  64.022  1.00 53.02           N
ATOM   1399  NH2 ARG A 187      50.315  42.437  65.040  1.00 52.48           N
ATOM   1400  N   GLU A 188      52.950  41.302  58.366  1.00 28.75           N
ATOM   1401  CA  GLU A 188      53.638  40.070  58.018  1.00 31.23           C
ATOM   1402  C   GLU A 188      54.528  40.299  56.808  1.00 29.95           C
ATOM   1403  O   GLU A 188      55.611  39.743  56.732  1.00 31.15           O
ATOM   1404  CB  GLU A 188      52.642  38.927  57.747  1.00 28.67           C
ATOM   1405  CG  GLU A 188      51.970  38.347  59.000  1.00 34.29           C
ATOM   1406  CD  GLU A 188      51.019  39.334  59.699  1.00 41.54           C
ATOM   1407  OE1 GLU A 188      50.230  40.011  59.002  1.00 31.22           O
ATOM   1408  OE2 GLU A 188      51.074  39.438  60.950  1.00 47.79           O
ATOM   1409  N   GLN A 189      54.081  41.130  55.874  1.00 28.60           N
ATOM   1410  CA  GLN A 189      54.912  41.479  54.725  1.00 29.27           C
ATOM   1411  C   GLN A 189      56.174  42.254  55.141  1.00 30.88           C
ATOM   1412  O   GLN A 189      57.277  41.962  54.661  1.00 30.95           O
ATOM   1413  CB  GLN A 189      54.120  42.294  53.712  1.00 28.63           C
ATOM   1414  CG  GLN A 189      54.919  42.668  52.475  1.00 33.44           C
ATOM   1415  CD  GLN A 189      54.067  43.316  51.394  1.00 36.77           C
ATOM   1416  OE1 GLN A 189      53.218  44.178  51.674  1.00 34.73           O
ATOM   1417  NE2 GLN A 189      54.283  42.895  50.145  1.00 32.59           N
ATOM   1418  N   VAL A 190      56.008  43.214  56.046  1.00 28.59           N
ATOM   1419  CA  VAL A 190      57.125  43.995  56.580  1.00 28.72           C
ATOM   1420  C   VAL A 190      58.098  43.130  57.374  1.00 32.18           C
ATOM   1421  O   VAL A 190      59.312  43.203  57.184  1.00 31.63           O
ATOM   1422  CB  VAL A 190      56.634  45.135  57.491  1.00 29.42           C
ATOM   1423  CG1 VAL A 190      57.817  45.782  58.248  1.00 27.30           C
ATOM   1424  CG2 VAL A 190      55.845  46.182  56.677  1.00 25.63           C
ATOM   1425  N   THR A 191      57.557  42.310  58.264  1.00 31.63           N
ATOM   1426  CA  THR A 191      58.369  41.456  59.126  1.00 30.43           C
ATOM   1427  C   THR A 191      59.205  40.485  58.297  1.00 35.72           C
ATOM   1428  O   THR A 191      60.363  40.197  58.633  1.00 36.51           O
ATOM   1429  CB  THR A 191      57.471  40.681  60.115  1.00 36.37           C
ATOM   1430  OG1 THR A 191      56.779  41.620  60.945  1.00 42.34           O
ATOM   1431  CG2 THR A 191      58.285  39.763  60.992  1.00 41.74           C
ATOM   1432  N   HIS A 192      58.603  39.981  57.217  1.00 33.66           N
ATOM   1433  CA  HIS A 192      59.263  39.072  56.293  1.00 30.33           C
ATOM   1434  C   HIS A 192      60.361  39.775  55.500  1.00 32.06           C
ATOM   1435  O   HIS A 192      61.471  39.243  55.354  1.00 33.94           O
ATOM   1436  CB  HIS A 192      58.249  38.469  55.326  1.00 30.16           C
ATOM   1437  CG  HIS A 192      58.864  37.550  54.321  1.00 33.32           C
ATOM   1438  ND1 HIS A 192      59.164  36.235  54.604  1.00 37.08           N
ATOM   1439  CD2 HIS A 192      59.239  37.752  53.036  1.00 32.15           C
ATOM   1440  CE1 HIS A 192      59.702  35.670  53.541  1.00 34.70           C
ATOM   1441  NE2 HIS A 192      59.759  36.568  52.574  1.00 33.81           N
ATOM   1442  N   ALA A 193      60.044  40.966  54.990  1.00 27.62           N
ATOM   1443  CA  ALA A 193      61.016  41.783  54.267  1.00 32.20           C
ATOM   1444  C   ALA A 193      62.293  41.992  55.093  1.00 30.61           C
ATOM   1445  O   ALA A 193      63.402  41.862  54.566  1.00 26.65           O
ATOM   1446  CB  ALA A 193      60.410  43.138  53.872  1.00 24.93           C
ATOM   1447  N   LEU A 194      62.129  42.283  56.385  1.00 27.67           N
ATOM   1448  CA  LEU A 194      63.270  42.520  57.273  1.00 28.95           C
ATOM   1449  C   LEU A 194      64.125  41.273  57.444  1.00 36.27           C
ATOM   1450  O   LEU A 194      65.324  41.348  57.734  1.00 32.71           O
ATOM   1451  CB  LEU A 194      62.786  43.007  58.638  1.00 27.89           C
ATOM   1452  CG  LEU A 194      62.149  44.404  58.620  1.00 29.92           C
ATOM   1453  CD1 LEU A 194      61.498  44.728  59.949  1.00 30.67           C
ATOM   1454  CD2 LEU A 194      63.187  45.449  58.270  1.00 31.48           C
ATOM   1455  N   GLU A 195      63.504  40.117  57.258  1.00 33.78           N
ATOM   1456  CA  GLU A 195      64.216  38.861  57.429  1.00 37.33           C
ATOM   1457  C   GLU A 195      64.804  38.413  56.086  1.00 31.09           C
ATOM   1458  O   GLU A 195      65.850  37.789  56.036  1.00 33.64           O
ATOM   1459  CB  GLU A 195      63.277  37.800  58.036  1.00 32.11           C
ATOM   1460  CG  GLU A 195      63.497  36.403  57.512  1.00 48.84           C
ATOM   1461  CD  GLU A 195      62.604  35.356  58.180  1.00 60.75           C
ATOM   1462  OE1 GLU A 195      61.614  35.734  58.855  1.00 60.24           O
ATOM   1463  OE2 GLU A 195      62.917  34.152  58.037  1.00 67.13           O
ATOM   1464  N   GLN A 196      64.125  38.776  55.003  1.00 32.08           N
ATOM   1465  CA  GLN A 196      64.491  38.362  53.659  1.00 28.05           C
ATOM   1466  C   GLN A 196      64.035  39.411  52.633  1.00 28.76           C
ATOM   1467  O   GLN A 196      62.858  39.466  52.302  1.00 27.22           O
ATOM   1468  CB  GLN A 196      63.858  37.006  53.333  1.00 28.52           C
ATOM   1469  CG  GLN A 196      64.094  36.566  51.915  1.00 25.85           C
ATOM   1470  CD  GLN A 196      65.552  36.241  51.684  1.00 29.22           C
ATOM   1471  OE1 GLN A 196      66.036  35.209  52.143  1.00 32.90           O
ATOM   1472  NE2 GLN A 196      66.272  37.138  51.012  1.00 25.61           N
ATOM   1473  N   CYS A 197      64.946  40.255  52.143  1.00 24.90           N
ATOM   1474  CA  CYS A 197      64.562  41.230  51.130  1.00 25.79           C
ATOM   1475  C   CYS A 197      64.172  40.512  49.850  1.00 26.97           C
ATOM   1476  O   CYS A 197      64.586  39.376  49.617  1.00 23.85           O
ATOM   1477  CB  CYS A 197      65.683  42.235  50.853  1.00 27.71           C
ATOM   1478  SG  CYS A 197      67.101  41.540  49.989  1.00 29.11           S
ATOM   1479  N   LEU A 198      63.376  41.179  49.018  1.00 27.54           N
ATOM   1480  CA  LEU A 198      62.876  40.568  47.789  1.00 27.88           C
ATOM   1481  C   LEU A 198      63.996  40.285  46.782  1.00 27.92           C
ATOM   1482  O   LEU A 198      64.115  39.167  46.284  1.00 27.39           O
ATOM   1483  CB  LEU A 198      61.808  41.461  47.153  1.00 24.17           C
ATOM   1484  CG  LEU A 198      61.153  40.987  45.853  1.00 26.03           C
ATOM   1485  CD1 LEU A 198      60.567  39.584  45.991  1.00 28.51           C
ATOM   1486  CD2 LEU A 198      60.072  41.982  45.427  1.00 25.99           C
ATOM   1487  N   HIS A 199      64.820  41.292  46.491  1.00 28.28           N
ATOM   1488  CA  HIS A 199      65.849  41.184  45.446  1.00 23.13           C
ATOM   1489  C   HIS A 199      66.794  40.005  45.620  1.00 25.20           C
ATOM   1490  O   HIS A 199      67.273  39.445  44.629  1.00 28.28           O
ATOM   1491  CB  HIS A 199      66.659  42.473  45.373  1.00 24.57           C
ATOM   1492  CG  HIS A 199      67.672  42.489  44.275  1.00 28.50           C
ATOM   1493  ND1 HIS A 199      67.333  42.309  42.947  1.00 27.55           N
ATOM   1494  CD2 HIS A 199      69.015  42.665  44.297  1.00 29.51           C
ATOM   1495  CE1 HIS A 199      68.422  42.365  42.207  1.00 30.09           C
ATOM   1496  NE2 HIS A 199      69.460  42.579  43.002  1.00 29.15           N
ATOM   1497  N   LYS A 200      67.063  39.617  46.864  1.00 24.18           N
ATOM   1498  CA  LYS A 200      68.035  38.548  47.113  1.00 25.36           C
ATOM   1499  C   LYS A 200      67.408  37.231  47.533  1.00 27.27           C
ATOM   1500  O   LYS A 200      68.113  36.352  48.014  1.00 26.27           O
ATOM   1501  CB  LYS A 200      69.039  38.967  48.186  1.00 25.30           C
ATOM   1502  CG  LYS A 200      69.803  40.252  47.866  1.00 28.95           C
ATOM   1503  CD  LYS A 200      70.801  40.600  48.963  1.00 27.04           C
ATOM   1504  CE  LYS A 200      71.671  41.770  48.554  1.00 30.27           C
ATOM   1505  NZ  LYS A 200      72.355  42.405  49.720  1.00 33.47           N
ATOM   1506  N   GLY A 201      66.095  37.084  47.359  1.00 27.61           N
ATOM   1507  CA  GLY A 201      65.445  35.841  47.716  1.00 23.73           C
ATOM   1508  C   GLY A 201      65.355  34.922  46.520  1.00 23.98           C
ATOM   1509  O   GLY A 201      65.467  35.365  45.383  1.00 26.55           O
ATOM   1510  N   VAL A 202      65.159  33.634  46.760  1.00 24.08           N
ATOM   1511  CA  VAL A 202      64.872  32.728  45.660  1.00 25.11           C
ATOM   1512  C   VAL A 202      63.438  32.981  45.184  1.00 27.46           C
ATOM   1513  O   VAL A 202      62.503  32.966  45.984  1.00 28.35           O
ATOM   1514  CB  VAL A 202      65.062  31.266  46.077  1.00 26.90           C
ATOM   1515  CG1 VAL A 202      64.422  30.304  45.049  1.00 23.60           C
ATOM   1516  CG2 VAL A 202      66.545  30.974  46.271  1.00 30.53           C
ATOM   1517  N   PRO A 203      63.264  33.234  43.879  1.00 28.10           N
ATOM   1518  CA  PRO A 203      61.983  33.643  43.301  1.00 27.61           C
ATOM   1519  C   PRO A 203      60.779  32.738  43.646  1.00 29.53           C
ATOM   1520  O   PRO A 203      59.764  33.261  44.093  1.00 29.15           O
ATOM   1521  CB  PRO A 203      62.275  33.622  41.803  1.00 28.56           C
ATOM   1522  CG  PRO A 203      63.733  34.030  41.730  1.00 29.85           C
ATOM   1523  CD  PRO A 203      64.354  33.282  42.884  1.00 29.33           C
ATOM   1524  N   ARG A 204      60.874  31.431  43.445  1.00 29.44           N
ATOM   1525  CA  ARG A 204      59.760  30.556  43.796  1.00 29.15           C
ATOM   1526  C   ARG A 204      59.450  30.645  45.282  1.00 28.85           C
ATOM   1527  O   ARG A 204      58.292  30.606  45.674  1.00 28.28           O
ATOM   1528  CB  ARG A 204      60.051  29.107  43.419  1.00 28.39           C
ATOM   1529  CG  ARG A 204      59.827  28.780  41.971  1.00 29.50           C
ATOM   1530  CD  ARG A 204      58.360  28.714  41.625  1.00 30.16           C
ATOM   1531  NE  ARG A 204      57.866  29.980  41.102  1.00 29.68           N
ATOM   1532  CZ  ARG A 204      56.717  30.130  40.445  1.00 31.36           C
ATOM   1533  NH1 ARG A 204      55.921  29.077  40.225  1.00 30.41           N
ATOM   1534  NH2 ARG A 204      56.370  31.327  39.992  1.00 25.78           N
ATOM   1535  N   VAL A 205      60.480  30.791  46.111  1.00 27.96           N
ATOM   1536  CA  VAL A 205      60.253  30.856  47.548  1.00 25.10           C
ATOM   1537  C   VAL A 205      59.481  32.117  47.932  1.00 29.35           C
ATOM   1538  O   VAL A 205      58.491  32.051  48.663  1.00 28.12           O
ATOM   1539  CB  VAL A 205      61.561  30.799  48.314  1.00 26.08           C
ATOM   1540  CG1 VAL A 205      61.299  30.941  49.805  1.00 24.13           C
ATOM   1541  CG2 VAL A 205      62.282  29.475  48.005  1.00 27.66           C
ATOM   1542  N   GLU A 206      59.921  33.262  47.425  1.00 28.61           N
ATOM   1543  CA  GLU A 206      59.242  34.518  47.709  1.00 29.06           C
ATOM   1544  C   GLU A 206      57.843  34.555  47.113  1.00 26.86           C
ATOM   1545  O   GLU A 206      56.910  35.020  47.755  1.00 30.09           O
ATOM   1546  CB  GLU A 206      60.071  35.691  47.186  1.00 25.94           C
ATOM   1547  CG  GLU A 206      61.419  35.761  47.853  1.00 30.60           C
ATOM   1548  CD  GLU A 206      61.311  35.646  49.364  1.00 31.12           C
ATOM   1549  OE1 GLU A 206      60.637  36.510  49.960  1.00 27.62           O
ATOM   1550  OE2 GLU A 206      61.898  34.698  49.947  1.00 28.21           O
ATOM   1551  N   THR A 207      57.715  34.076  45.880  1.00 26.95           N
ATOM   1552  CA  THR A 207      56.435  33.970  45.210  1.00 27.92           C
ATOM   1553  C   THR A 207      55.431  33.191  46.054  1.00 32.13           C
ATOM   1554  O   THR A 207      54.278  33.611  46.204  1.00 27.78           O
ATOM   1555  CB  THR A 207      56.564  33.279  43.841  1.00 32.26           C
ATOM   1556  OG1 THR A 207      57.150  34.188  42.908  1.00 33.42           O
ATOM   1557  CG2 THR A 207      55.166  32.814  43.309  1.00 27.14           C
ATOM   1558  N   ARG A 208      55.862  32.064  46.615  1.00 29.86           N
ATOM   1559  CA  ARG A 208      54.906  31.266  47.350  1.00 32.53           C
ATOM   1560  C   ARG A 208      54.526  31.908  48.674  1.00 31.09           C
ATOM   1561  O   ARG A 208      53.367  31.818  49.097  1.00 31.09           O
ATOM   1562  CB  ARG A 208      55.411  29.871  47.636  1.00 30.49           C
ATOM   1563  CG  ARG A 208      54.282  29.101  48.250  1.00 35.28           C
ATOM   1564  CD  ARG A 208      54.733  27.833  48.775  1.00 44.06           C
ATOM   1565  NE  ARG A 208      53.664  27.108  49.453  1.00 50.95           N
ATOM   1566  CZ  ARG A 208      52.829  26.274  48.851  1.00 50.20           C
ATOM   1567  NH1 ARG A 208      51.909  25.635  49.555  1.00 46.45           N
ATOM   1568  NH2 ARG A 208      52.944  26.052  47.546  1.00 55.71           N
ATOM   1569  N   PHE A 209      55.491  32.528  49.352  1.00 27.71           N
ATOM   1570  CA  PHE A 209      55.137  33.307  50.540  1.00 30.29           C
ATOM   1571  C   PHE A 209      54.181  34.450  50.186  1.00 29.98           C
ATOM   1572  O   PHE A 209      53.231  34.707  50.920  1.00 32.33           O
ATOM   1573  CB  PHE A 209      56.368  33.880  51.241  1.00 30.62           C
ATOM   1574  CG  PHE A 209      56.033  34.855  52.342  1.00 30.92           C
ATOM   1575  CD1 PHE A 209      55.729  34.406  53.621  1.00 32.03           C
ATOM   1576  CD2 PHE A 209      55.997  36.214  52.093  1.00 27.46           C
ATOM   1577  CE1 PHE A 209      55.415  35.307  54.632  1.00 29.88           C
ATOM   1578  CE2 PHE A 209      55.675  37.120  53.090  1.00 27.31           C
ATOM   1579  CZ  PHE A 209      55.393  36.673  54.356  1.00 28.69           C
ATOM   1580  N   PHE A 210      54.432  35.160  49.087  1.00 29.82           N
ATOM   1581  CA  PHE A 210      53.578  36.316  48.766  1.00 28.76           C
ATOM   1582  C   PHE A 210      52.151  35.860  48.441  1.00 29.56           C
ATOM   1583  O   PHE A 210      51.183  36.407  48.971  1.00 27.69           O
ATOM   1584  CB  PHE A 210      54.151  37.128  47.599  1.00 24.66           C
ATOM   1585  CG  PHE A 210      53.329  38.350  47.234  1.00 27.11           C
ATOM   1586  CD1 PHE A 210      53.361  39.486  48.021  1.00 29.12           C
ATOM   1587  CD2 PHE A 210      52.526  38.357  46.097  1.00 27.72           C
ATOM   1588  CE1 PHE A 210      52.600  40.604  47.685  1.00 31.87           C
ATOM   1589  CE2 PHE A 210      51.762  39.475  45.760  1.00 29.03           C
ATOM   1590  CZ  PHE A 210      51.800  40.592  46.549  1.00 29.48           C
ATOM   1591  N   ILE A 211      52.027  34.875  47.558  1.00 26.68           N
ATOM   1592  CA  ILE A 211      50.718  34.369  47.173  1.00 31.56           C
ATOM   1593  C   ILE A 211      49.923  33.966  48.410  1.00 32.57           C
ATOM   1594  O   ILE A 211      48.852  34.506  48.654  1.00 31.03           O
ATOM   1595  CB  ILE A 211      50.803  33.155  46.228  1.00 30.61           C
ATOM   1596  CG1 ILE A 211      51.447  33.543  44.895  1.00 26.01           C
ATOM   1597  CG2 ILE A 211      49.396  32.592  45.970  1.00 28.70           C
ATOM   1598  CD1 ILE A 211      51.469  32.426  43.886  1.00 22.21           C
ATOM   1599  N   SER A 212      50.479  33.059  49.204  1.00 28.69           N
ATOM   1600  CA  SER A 212      49.746  32.438  50.314  1.00 35.27           C
ATOM   1601  C   SER A 212      49.610  33.261  51.589  1.00 35.86           C
ATOM   1602  O   SER A 212      48.565  33.238  52.236  1.00 33.38           O
ATOM   1603  CB  SER A 212      50.399  31.107  50.686  1.00 33.06           C
ATOM   1604  OG  SER A 212      50.023  30.134  49.746  1.00 44.56           O
ATOM   1605  N   SER A 213      50.685  33.923  51.992  1.00 31.27           N
ATOM   1606  CA  SER A 213      50.660  34.658  53.243  1.00 33.21           C
ATOM   1607  C   SER A 213      50.230  36.123  53.098  1.00 32.58           C
ATOM   1608  O   SER A 213      49.803  36.735  54.069  1.00 35.13           O
ATOM   1609  CB  SER A 213      52.036  34.596  53.899  1.00 31.00           C
ATOM   1610  OG  SER A 213      52.286  33.294  54.365  1.00 36.82           O
ATOM   1611  N   ILE A 214      50.355  36.698  51.907  1.00 29.49           N
ATOM   1612  CA  ILE A 214      50.107  38.127  51.785  1.00 28.51           C
ATOM   1613  C   ILE A 214      48.923  38.417  50.894  1.00 32.55           C
ATOM   1614  O   ILE A 214      47.900  38.885  51.382  1.00 35.13           O
ATOM   1615  CB  ILE A 214      51.326  38.904  51.239  1.00 31.01           C
ATOM   1616  CG1 ILE A 214      52.599  38.574  52.039  1.00 27.61           C
ATOM   1617  CG2 ILE A 214      51.034  40.425  51.237  1.00 29.10           C
ATOM   1618  CD1 ILE A 214      52.509  38.927  53.517  1.00 27.10           C
ATOM   1619  N   TYR A 215      49.054  38.141  49.597  1.00 30.24           N
ATOM   1620  CA  TYR A 215      48.065  38.597  48.631  1.00 32.80           C
ATOM   1621  C   TYR A 215      46.702  37.956  48.906  1.00 34.83           C
ATOM   1622  O   TYR A 215      45.671  38.615  48.849  1.00 31.90           O
ATOM   1623  CB  TYR A 215      48.506  38.304  47.198  1.00 27.70           C
ATOM   1624  CG  TYR A 215      47.861  39.227  46.201  1.00 31.50           C
ATOM   1625  CD1 TYR A 215      47.982  40.609  46.331  1.00 33.25           C
ATOM   1626  CD2 TYR A 215      47.117  38.733  45.138  1.00 32.77           C
ATOM   1627  CE1 TYR A 215      47.382  41.464  45.424  1.00 30.32           C
ATOM   1628  CE2 TYR A 215      46.514  39.584  44.226  1.00 27.05           C
ATOM   1629  CZ  TYR A 215      46.648  40.938  44.379  1.00 29.51           C
ATOM   1630  OH  TYR A 215      46.066  41.775  43.466  1.00 34.09           O
ATOM   1631  N   ASP A 216      46.722  36.678  49.242  1.00 34.87           N
ATOM   1632  CA  ASP A 216      45.508  35.950  49.557  1.00 36.36           C
ATOM   1633  C   ASP A 216      44.734  36.629  50.685  1.00 36.61           C
ATOM   1634  O   ASP A 216      43.514  36.565  50.726  1.00 35.36           O
ATOM   1635  CB  ASP A 216      45.839  34.509  49.939  1.00 31.39           C
ATOM   1636  CG  ASP A 216      44.587  33.639  50.072  1.00 39.86           C
ATOM   1637  OD1 ASP A 216      43.736  33.676  49.157  1.00 33.15           O
ATOM   1638  OD2 ASP A 216      44.463  32.912  51.084  1.00 41.20           O
ATOM   1639  N   LYS A 217      45.449  37.313  51.573  1.00 37.81           N
ATOM   1640  CA  LYS A 217      44.832  37.928  52.752  1.00 37.88           C
ATOM   1641  C   LYS A 217      44.615  39.424  52.629  1.00 34.69           C
ATOM   1642  O   LYS A 217      44.224  40.068  53.598  1.00 38.10           O
ATOM   1643  CB  LYS A 217      45.682  37.643  53.991  1.00 34.74           C
ATOM   1644  CG  LYS A 217      45.743  36.170  54.307  1.00 38.64           C
ATOM   1645  CD  LYS A 217      46.772  35.850  55.371  1.00 43.97           C
ATOM   1646  CE  LYS A 217      46.622  34.383  55.808  1.00 52.51           C
ATOM   1647  NZ  LYS A 217      47.734  33.941  56.708  1.00 55.75           N
ATOM   1648  N   GLU A 218      44.877  39.979  51.452  1.00 35.71           N
ATOM   1649  CA  GLU A 218      44.686  41.411  51.224  1.00 40.45           C
ATOM   1650  C   GLU A 218      43.241  41.710  50.942  1.00 39.16           C
ATOM   1651  O   GLU A 218      42.685  41.131  50.021  1.00 39.35           O
ATOM   1652  CB  GLU A 218      45.497  41.900  50.028  1.00 38.14           C
ATOM   1653  CG  GLU A 218      46.974  41.983  50.238  1.00 44.65           C
ATOM   1654  CD  GLU A 218      47.386  43.257  50.923  1.00 46.87           C
ATOM   1655  OE1 GLU A 218      46.493  44.014  51.382  1.00 45.11           O
ATOM   1656  OE2 GLU A 218      48.617  43.488  50.991  1.00 51.03           O
ATOM   1657  N   GLN A 219      42.644  42.638  51.680  1.00 48.11           N
ATOM   1658  CA  GLN A 219      41.260  43.026  51.390  1.00 53.40           C
ATOM   1659  C   GLN A 219      41.142  43.566  49.962  1.00 48.97           C
ATOM   1660  O   GLN A 219      40.184  43.276  49.251  1.00 47.77           O
ATOM   1661  CB  GLN A 219      40.755  44.069  52.384  1.00 55.18           C
ATOM   1662  CG  GLN A 219      39.273  44.394  52.207  1.00 69.77           C
ATOM   1663  CD  GLN A 219      38.747  45.361  53.256  1.00 85.00           C
ATOM   1664  OE1 GLN A 219      39.465  45.736  54.190  1.00 87.84           O
ATOM   1665  NE2 GLN A 219      37.487  45.776  53.104  1.00 84.24           N
ATOM   1666  N   SER A 220      42.157  44.313  49.545  1.00 46.64           N
ATOM   1667  CA  SER A 220      42.176  44.964  48.241  1.00 46.74           C
ATOM   1668  C   SER A 220      42.576  44.069  47.065  1.00 44.17           C
ATOM   1669  O   SER A 220      42.650  44.546  45.933  1.00 49.51           O
ATOM   1670  CB  SER A 220      43.135  46.156  48.297  1.00 49.64           C
ATOM   1671  OG  SER A 220      44.419  45.740  48.759  1.00 51.34           O
ATOM   1672  N   LYS A 221      42.841  42.791  47.322  1.00 40.81           N
ATOM   1673  CA  LYS A 221      43.418  41.923  46.301  1.00 39.54           C
ATOM   1674  C   LYS A 221      42.569  41.877  45.030  1.00 40.78           C
ATOM   1675  O   LYS A 221      41.349  42.024  45.084  1.00 44.52           O
ATOM   1676  CB  LYS A 221      43.601  40.506  46.854  1.00 38.48           C
ATOM   1677  CG  LYS A 221      42.297  39.714  46.957  1.00 40.96           C
ATOM   1678  CD  LYS A 221      42.472  38.462  47.770  1.00 41.74           C
ATOM   1679  CE  LYS A 221      41.182  37.664  47.822  1.00 46.63           C
ATOM   1680  NZ  LYS A 221      40.123  38.420  48.537  1.00 54.08           N
ATOM   1681  N   ASN A 222      43.226  41.689  43.890  1.00 35.24           N
ATOM   1682  CA  ASN A 222      42.542  41.460  42.626  1.00 34.39           C
ATOM   1683  C   ASN A 222      42.328  39.958  42.430  1.00 36.80           C
ATOM   1684  O   ASN A 222      43.280  39.176  42.437  1.00 32.30           O
ATOM   1685  CB  ASN A 222      43.339  42.057  41.467  1.00 34.82           C
ATOM   1686  CG  ASN A 222      42.673  41.838  40.125  1.00 36.32           C
ATOM   1687  OD1 ASN A 222      42.564  40.705  39.652  1.00 37.79           O
ATOM   1688  ND2 ASN A 222      42.239  42.920  39.492  1.00 34.42           N
ATOM   1689  N   ASN A 223      41.065  39.564  42.266  1.00 34.05           N
ATOM   1690  CA  ASN A 223      40.679  38.163  42.237  1.00 31.07           C
ATOM   1691  C   ASN A 223      41.168  37.428  41.013  1.00 33.29           C
ATOM   1692  O   ASN A 223      41.521  36.253  41.092  1.00 30.89           O
ATOM   1693  CB  ASN A 223      39.156  38.028  42.334  1.00 32.13           C
ATOM   1694  CG  ASN A 223      38.629  38.526  43.648  1.00 36.33           C
ATOM   1695  OD1 ASN A 223      38.800  37.868  44.674  1.00 39.37           O
ATOM   1696  ND2 ASN A 223      38.001  39.704  43.638  1.00 33.71           N
ATOM   1697  N   VAL A 224      41.179  38.119  39.883  1.00 33.89           N
ATOM   1698  CA  VAL A 224      41.693  37.553  38.645  1.00 32.61           C
ATOM   1699  C   VAL A 224      43.181  37.208  38.798  1.00 36.56           C
ATOM   1700  O   VAL A 224      43.621  36.104  38.437  1.00 31.90           O
ATOM   1701  CB  VAL A 224      41.485  38.532  37.467  1.00 37.36           C
ATOM   1702  CG1 VAL A 224      42.201  38.047  36.218  1.00 34.92           C
ATOM   1703  CG2 VAL A 224      39.970  38.754  37.209  1.00 34.49           C
ATOM   1704  N   LEU A 225      43.950  38.141  39.362  1.00 32.38           N
ATOM   1705  CA  LEU A 225      45.384  37.927  39.514  1.00 32.45           C
ATOM   1706  C   LEU A 225      45.657  36.820  40.516  1.00 32.36           C
ATOM   1707  O   LEU A 225      46.497  35.969  40.274  1.00 31.96           O
ATOM   1708  CB  LEU A 225      46.092  39.220  39.942  1.00 33.76           C
ATOM   1709  CG  LEU A 225      46.155  40.339  38.898  1.00 32.13           C
ATOM   1710  CD1 LEU A 225      46.882  41.574  39.444  1.00 25.71           C
ATOM   1711  CD2 LEU A 225      46.809  39.820  37.636  1.00 27.32           C
ATOM   1712  N   LEU A 226      44.933  36.815  41.634  1.00 35.41           N
ATOM   1713  CA  LEU A 226      45.155  35.798  42.669  1.00 32.85           C
ATOM   1714  C   LEU A 226      44.859  34.367  42.192  1.00 36.26           C
ATOM   1715  O   LEU A 226      45.630  33.430  42.467  1.00 33.78           O
ATOM   1716  CB  LEU A 226      44.306  36.106  43.904  1.00 30.85           C
ATOM   1717  CG  LEU A 226      44.444  35.083  45.029  1.00 34.89           C
ATOM   1718  CD1 LEU A 226      45.889  35.028  45.553  1.00 31.86           C
ATOM   1719  CD2 LEU A 226      43.461  35.373  46.146  1.00 38.57           C
ATOM   1720  N   ARG A 227      43.744  34.192  41.485  1.00 31.39           N
ATOM   1721  CA  ARG A 227      43.390  32.871  40.972  1.00 34.65           C
ATOM   1722  C   ARG A 227      44.425  32.435  39.951  1.00 28.63           C
ATOM   1723  O   ARG A 227      44.902  31.309  39.985  1.00 31.32           O
ATOM   1724  CB  ARG A 227      41.978  32.862  40.352  1.00 32.11           C
ATOM   1725  CG  ARG A 227      41.640  31.545  39.667  1.00 31.34           C
ATOM   1726  CD  ARG A 227      40.134  31.290  39.553  1.00 38.82           C
ATOM   1727  NE  ARG A 227      39.866  29.973  38.972  1.00 39.71           N
ATOM   1728  CZ  ARG A 227      39.762  28.851  39.675  1.00 41.77           C
ATOM   1729  NH1 ARG A 227      39.878  28.877  40.998  1.00 41.48           N
ATOM   1730  NH2 ARG A 227      39.539  27.698  39.059  1.00 44.33           N
ATOM   1731  N   PHE A 228      44.764  33.348  39.048  1.00 31.83           N
ATOM   1732  CA  PHE A 228      45.831  33.149  38.068  1.00 35.11           C
ATOM   1733  C   PHE A 228      47.122  32.660  38.753  1.00 34.09           C
ATOM   1734  O   PHE A 228      47.693  31.634  38.366  1.00 32.73           O
ATOM   1735  CB  PHE A 228      46.067  34.467  37.310  1.00 35.14           C
ATOM   1736  CG  PHE A 228      47.030  34.371  36.151  1.00 35.28           C
ATOM   1737  CD1 PHE A 228      47.630  33.164  35.792  1.00 37.59           C
ATOM   1738  CD2 PHE A 228      47.342  35.507  35.426  1.00 31.86           C
ATOM   1739  CE1 PHE A 228      48.539  33.098  34.739  1.00 36.06           C
ATOM   1740  CE2 PHE A 228      48.231  35.451  34.367  1.00 38.76           C
ATOM   1741  CZ  PHE A 228      48.835  34.242  34.023  1.00 37.28           C
ATOM   1742  N   ALA A 229      47.559  33.378  39.781  1.00 31.77           N
ATOM   1743  CA  ALA A 229      48.808  33.044  40.443  1.00 31.66           C
ATOM   1744  C   ALA A 229      48.715  31.700  41.154  1.00 32.27           C
ATOM   1745  O   ALA A 229      49.684  30.945  41.177  1.00 33.31           O
ATOM   1746  CB  ALA A 229      49.200  34.144  41.424  1.00 30.23           C
ATOM   1747  N   LYS A 230      47.555  31.389  41.728  1.00 33.47           N
ATOM   1748  CA  LYS A 230      47.411  30.101  42.413  1.00 34.21           C
ATOM   1749  C   LYS A 230      47.414  28.939  41.431  1.00 31.75           C
ATOM   1750  O   LYS A 230      48.091  27.945  41.658  1.00 35.19           O
ATOM   1751  CB  LYS A 230      46.141  30.061  43.255  1.00 35.31           C
ATOM   1752  CG  LYS A 230      46.230  30.858  44.537  1.00 34.44           C
ATOM   1753  CD  LYS A 230      45.011  30.595  45.421  1.00 37.97           C
ATOM   1754  CE  LYS A 230      45.018  31.519  46.631  1.00 38.13           C
ATOM   1755  NZ  LYS A 230      43.851  31.279  47.516  1.00 39.09           N
ATOM   1756  N   LEU A 231      46.673  29.063  40.336  1.00 34.08           N
ATOM   1757  CA  LEU A 231      46.617  27.991  39.342  1.00 34.40           C
ATOM   1758  C   LEU A 231      47.980  27.772  38.689  1.00 34.74           C
ATOM   1759  O   LEU A 231      48.428  26.632  38.509  1.00 35.75           O
ATOM   1760  CB  LEU A 231      45.576  28.309  38.270  1.00 38.35           C
ATOM   1761  CG  LEU A 231      44.116  28.363  38.731  1.00 37.32           C
ATOM   1762  CD1 LEU A 231      43.181  28.706  37.577  1.00 39.66           C
ATOM   1763  CD2 LEU A 231      43.724  27.055  39.360  1.00 34.79           C
ATOM   1764  N   ASP A 232      48.642  28.867  38.329  1.00 34.37           N
ATOM   1765  CA  ASP A 232      49.941  28.772  37.668  1.00 33.76           C
ATOM   1766  C   ASP A 232      50.999  28.174  38.586  1.00 30.92           C
ATOM   1767  O   ASP A 232      51.732  27.272  38.192  1.00 32.64           O
ATOM   1768  CB  ASP A 232      50.395  30.137  37.179  1.00 33.59           C
ATOM   1769  CG  ASP A 232      51.340  30.035  36.017  1.00 34.45           C
ATOM   1770  OD1 ASP A 232      50.881  30.168  34.861  1.00 36.07           O
ATOM   1771  OD2 ASP A 232      52.541  29.814  36.263  1.00 31.17           O
ATOM   1772  N   PHE A 233      51.078  28.654  39.820  1.00 32.26           N
ATOM   1773  CA  PHE A 233      52.005  28.044  40.760  1.00 31.11           C
ATOM   1774  C   PHE A 233      51.778  26.540  40.887  1.00 33.56           C
ATOM   1775  O   PHE A 233      52.726  25.760  40.860  1.00 31.52           O
ATOM   1776  CB  PHE A 233      51.891  28.664  42.144  1.00 31.46           C
ATOM   1777  CG  PHE A 233      52.983  28.227  43.061  1.00 34.15           C
ATOM   1778  CD1 PHE A 233      54.161  28.959  43.140  1.00 31.57           C
ATOM   1779  CD2 PHE A 233      52.868  27.059  43.804  1.00 34.16           C
ATOM   1780  CE1 PHE A 233      55.196  28.552  43.963  1.00 33.19           C
ATOM   1781  CE2 PHE A 233      53.905  26.646  44.625  1.00 37.04           C
ATOM   1782  CZ  PHE A 233      55.073  27.398  44.704  1.00 34.51           C
ATOM   1783  N   ASN A 234      50.519  26.139  41.058  1.00 34.14           N
ATOM   1784  CA  ASN A 234      50.221  24.730  41.283  1.00 34.66           C
ATOM   1785  C   ASN A 234      50.474  23.903  40.027  1.00 33.97           C
ATOM   1786  O   ASN A 234      50.906  22.758  40.116  1.00 32.20           O
ATOM   1787  CB  ASN A 234      48.778  24.545  41.783  1.00 31.37           C
ATOM   1788  CG  ASN A 234      48.612  24.959  43.241  1.00 34.07           C
ATOM   1789  OD1 ASN A 234      49.593  25.109  43.978  1.00 34.55           O
ATOM   1790  ND2 ASN A 234      47.371  25.168  43.656  1.00 32.08           N
ATOM   1791  N   LEU A 235      50.236  24.489  38.858  1.00 33.62           N
ATOM   1792  CA  LEU A 235      50.480  23.776  37.611  1.00 33.50           C
ATOM   1793  C   LEU A 235      51.978  23.545  37.357  1.00 36.73           C
ATOM   1794  O   LEU A 235      52.378  22.427  37.018  1.00 35.83           O
ATOM   1795  CB  LEU A 235      49.856  24.531  36.441  1.00 35.35           C
ATOM   1796  CG  LEU A 235      49.959  23.833  35.081  1.00 40.45           C
ATOM   1797  CD1 LEU A 235      49.322  22.440  35.106  1.00 36.57           C
ATOM   1798  CD2 LEU A 235      49.322  24.708  34.002  1.00 37.68           C
ATOM   1799  N   LEU A 236      52.799  24.586  37.534  1.00 32.09           N
ATOM   1800  CA  LEU A 236      54.260  24.434  37.417  1.00 34.23           C
ATOM   1801  C   LEU A 236      54.771  23.416  38.425  1.00 33.21           C
ATOM   1802  O   LEU A 236      55.673  22.637  38.126  1.00 33.03           O
ATOM   1803  CB  LEU A 236      54.999  25.777  37.610  1.00 30.71           C
ATOM   1804  CG  LEU A 236      54.864  26.764  36.443  1.00 37.60           C
ATOM   1805  CD1 LEU A 236      55.850  27.925  36.527  1.00 32.35           C
ATOM   1806  CD2 LEU A 236      55.016  26.043  35.111  1.00 40.35           C
ATOM   1807  N   GLN A 237      54.186  23.417  39.619  1.00 34.11           N
ATOM   1808  CA  GLN A 237      54.585  22.471  40.647  1.00 32.74           C
ATOM   1809  C   GLN A 237      54.450  21.032  40.152  1.00 36.83           C
ATOM   1810  O   GLN A 237      55.281  20.184  40.490  1.00 35.48           O
ATOM   1811  CB  GLN A 237      53.753  22.662  41.916  1.00 34.20           C
ATOM   1812  CG  GLN A 237      54.254  21.857  43.117  1.00 33.10           C
ATOM   1813  CD  GLN A 237      53.388  22.036  44.353  1.00 37.98           C
ATOM   1814  OE1 GLN A 237      52.199  21.696  44.343  1.00 38.33           O
ATOM   1815  NE2 GLN A 237      53.981  22.561  45.432  1.00 33.23           N
ATOM   1816  N   MET A 238      53.408  20.760  39.363  1.00 34.35           N
ATOM   1817  CA  MET A 238      53.189  19.412  38.827  1.00 38.90           C
ATOM   1818  C   MET A 238      54.374  19.022  37.956  1.00 35.57           C
ATOM   1819  O   MET A 238      54.882  17.910  38.044  1.00 37.50           O
ATOM   1820  CB  MET A 238      51.886  19.331  38.021  1.00 34.11           C
ATOM   1821  CG  MET A 238      50.612  19.547  38.846  1.00 39.45           C
ATOM   1822  SD  MET A 238      49.105  19.538  37.830  1.00 41.15           S
ATOM   1823  CE  MET A 238      47.921  20.333  38.917  1.00 42.27           C
ATOM   1824  N   LEU A 239      54.820  19.955  37.125  1.00 36.49           N
ATOM   1825  CA  LEU A 239      55.997  19.736  36.293  1.00 37.14           C
ATOM   1826  C   LEU A 239      57.227  19.457  37.158  1.00 34.26           C
ATOM   1827  O   LEU A 239      57.944  18.475  36.943  1.00 36.17           O
ATOM   1828  CB  LEU A 239      56.243  20.942  35.388  1.00 33.79           C
ATOM   1829  CG  LEU A 239      57.518  20.830  34.543  1.00 38.93           C
ATOM   1830  CD1 LEU A 239      57.461  19.592  33.681  1.00 34.53           C
ATOM   1831  CD2 LEU A 239      57.689  22.059  33.683  1.00 36.25           C
ATOM   1832  N   HIS A 240      57.451  20.307  38.154  1.00 32.98           N
ATOM   1833  CA  HIS A 240      58.611  20.155  39.027  1.00 36.34           C
ATOM   1834  C   HIS A 240      58.598  18.800  39.697  1.00 35.55           C
ATOM   1835  O   HIS A 240      59.646  18.167  39.830  1.00 39.60           O
ATOM   1836  CB  HIS A 240      58.662  21.274  40.071  1.00 32.00           C
ATOM   1837  CG  HIS A 240      58.678  22.641  39.466  1.00 31.66           C
ATOM   1838  ND1 HIS A 240      58.154  23.748  40.099  1.00 32.46           N
ATOM   1839  CD2 HIS A 240      59.133  23.075  38.268  1.00 31.50           C
ATOM   1840  CE1 HIS A 240      58.279  24.803  39.315  1.00 32.81           C
ATOM   1841  NE2 HIS A 240      58.874  24.423  38.199  1.00 33.48           N
ATOM   1842  N   LYS A 241      57.415  18.347  40.098  1.00 33.49           N
ATOM   1843  CA  LYS A 241      57.276  17.040  40.736  1.00 37.90           C
ATOM   1844  C   LYS A 241      57.596  15.898  39.762  1.00 36.95           C
ATOM   1845  O   LYS A 241      58.260  14.933  40.142  1.00 38.14           O
ATOM   1846  CB  LYS A 241      55.869  16.882  41.322  1.00 36.71           C
ATOM   1847  CG  LYS A 241      55.666  17.714  42.588  1.00 38.70           C
ATOM   1848  CD  LYS A 241      54.202  17.959  42.920  1.00 35.93           C
ATOM   1849  CE  LYS A 241      53.571  16.748  43.586  1.00 45.42           C
ATOM   1850  NZ  LYS A 241      52.216  17.082  44.106  1.00 39.80           N
ATOM   1851  N   GLN A 242      57.144  16.015  38.512  1.00 37.38           N
ATOM   1852  CA  GLN A 242      57.528  15.068  37.462  1.00 35.11           C
ATOM   1853  C   GLN A 242      59.045  15.030  37.310  1.00 40.79           C
ATOM   1854  O   GLN A 242      59.657  13.955  37.304  1.00 39.93           O
ATOM   1855  CB  GLN A 242      56.882  15.439  36.123  1.00 39.02           C
ATOM   1856  CG  GLN A 242      55.411  15.035  35.990  1.00 47.22           C
ATOM   1857  CD  GLN A 242      54.782  15.480  34.671  1.00 52.64           C
ATOM   1858  OE1 GLN A 242      54.995  16.603  34.213  1.00 56.08           O
ATOM   1859  NE2 GLN A 242      54.003  14.596  34.058  1.00 56.68           N
ATOM   1860  N   GLU A 243      59.654  16.210  37.201  1.00 39.17           N
ATOM   1861  CA  GLU A 243      61.096  16.290  37.042  1.00 35.95           C
ATOM   1862  C   GLU A 243      61.803  15.646  38.213  1.00 35.94           C
ATOM   1863  O   GLU A 243      62.730  14.858  38.028  1.00 36.15           O
ATOM   1864  CB  GLU A 243      61.548  17.738  36.906  1.00 34.99           C
ATOM   1865  CG  GLU A 243      61.151  18.409  35.613  1.00 34.00           C
ATOM   1866  CD  GLU A 243      61.341  19.913  35.685  1.00 38.31           C
ATOM   1867  OE1 GLU A 243      61.915  20.408  36.691  1.00 35.13           O
ATOM   1868  OE2 GLU A 243      60.922  20.600  34.733  1.00 40.32           O
ATOM   1869  N   LEU A 244      61.373  15.982  39.424  1.00 35.91           N
ATOM   1870  CA  LEU A 244      62.029  15.439  40.613  1.00 37.19           C
ATOM   1871  C   LEU A 244      61.880  13.904  40.680  1.00 38.99           C
ATOM   1872  O   LEU A 244      62.798  13.195  41.118  1.00 36.02           O
ATOM   1873  CB  LEU A 244      61.471  16.096  41.877  1.00 31.33           C
ATOM   1874  CG  LEU A 244      62.058  15.605  43.203  1.00 37.79           C
ATOM   1875  CD1 LEU A 244      63.590  15.607  43.175  1.00 32.08           C
ATOM   1876  CD2 LEU A 244      61.530  16.432  44.366  1.00 34.18           C
ATOM   1877  N   ALA A 245      60.729  13.394  40.244  1.00 35.67           N
ATOM   1878  CA  ALA A 245      60.506  11.947  40.255  1.00 42.46           C
ATOM   1879  C   ALA A 245      61.473  11.271  39.288  1.00 38.95           C
ATOM   1880  O   ALA A 245      62.102  10.272  39.611  1.00 40.43           O
ATOM   1881  CB  ALA A 245      59.054  11.617  39.889  1.00 42.70           C
ATOM   1882  N   GLN A 246      61.579  11.851  38.100  1.00 37.46           N
ATOM   1883  CA  GLN A 246      62.470  11.375  37.053  1.00 42.19           C
ATOM   1884  C   GLN A 246      63.939  11.436  37.488  1.00 41.97           C
ATOM   1885  O   GLN A 246      64.713  10.509  37.243  1.00 44.76           O
ATOM   1886  CB  GLN A 246      62.229  12.202  35.794  1.00 43.81           C
ATOM   1887  CG  GLN A 246      63.171  11.953  34.645  1.00 52.12           C
ATOM   1888  CD  GLN A 246      63.091  13.077  33.619  1.00 56.12           C
ATOM   1889  OE1 GLN A 246      62.048  13.724  33.473  1.00 62.83           O
ATOM   1890  NE2 GLN A 246      64.186  13.316  32.907  1.00 51.81           N
ATOM   1891  N   VAL A 247      64.308  12.516  38.164  1.00 39.33           N
ATOM   1892  CA  VAL A 247      65.653  12.658  38.726  1.00 41.95           C
ATOM   1893  C   VAL A 247      65.876  11.720  39.924  1.00 40.13           C
ATOM   1894  O   VAL A 247      66.978  11.202  40.125  1.00 39.51           O
ATOM   1895  CB  VAL A 247      65.915  14.130  39.141  1.00 35.72           C
ATOM   1896  CG1 VAL A 247      67.022  14.229  40.171  1.00 33.84           C
ATOM   1897  CG2 VAL A 247      66.212  14.973  37.908  1.00 34.85           C
ATOM   1898  N   SER A 248      64.828  11.477  40.707  1.00 43.89           N
ATOM   1899  CA  SER A 248      64.954  10.551  41.839  1.00 46.41           C
ATOM   1900  C   SER A 248      65.148   9.103  41.378  1.00 44.42           C
ATOM   1901  O   SER A 248      65.818   8.330  42.052  1.00 41.56           O
ATOM   1902  CB  SER A 248      63.741  10.644  42.763  1.00 42.71           C
ATOM   1903  OG  SER A 248      63.832  11.787  43.598  1.00 42.30           O
ATOM   1904  N   ARG A 249      64.574   8.749  40.230  1.00 44.99           N
ATOM   1905  CA  ARG A 249      64.689   7.389  39.698  1.00 45.58           C
ATOM   1906  C   ARG A 249      66.091   7.182  39.159  1.00 50.07           C
ATOM   1907  O   ARG A 249      66.737   6.171  39.437  1.00 47.21           O
ATOM   1908  CB  ARG A 249      63.657   7.135  38.599  1.00 49.29           C
ATOM   1909  CG  ARG A 249      63.824   5.789  37.887  1.00 60.39           C
ATOM   1910  CD  ARG A 249      63.589   4.610  38.840  1.00 59.95           C
ATOM   1911  NE  ARG A 249      62.200   4.579  39.298  1.00 66.52           N
ATOM   1912  CZ  ARG A 249      61.735   3.782  40.257  1.00 66.12           C
ATOM   1913  NH1 ARG A 249      62.550   2.940  40.880  1.00 59.31           N
ATOM   1914  NH2 ARG A 249      60.449   3.835  40.596  1.00 69.93           N
ATOM   1915  N   TRP A 250      66.550   8.168  38.393  1.00 50.83           N
ATOM   1916  CA  TRP A 250      67.915   8.208  37.887  1.00 45.12           C
ATOM   1917  C   TRP A 250      68.927   8.072  39.015  1.00 44.69           C
ATOM   1918  O   TRP A 250      69.908   7.350  38.888  1.00 51.20           O
ATOM   1919  CB  TRP A 250      68.150   9.505  37.114  1.00 44.38           C
ATOM   1920  CG  TRP A 250      69.604   9.828  36.874  1.00 47.29           C
ATOM   1921  CD1 TRP A 250      70.375   9.395  35.838  1.00 41.28           C
ATOM   1922  CD2 TRP A 250      70.450  10.668  37.682  1.00 47.29           C
ATOM   1923  NE1 TRP A 250      71.646   9.896  35.954  1.00 47.23           N
ATOM   1924  CE2 TRP A 250      71.720  10.686  37.072  1.00 49.57           C
ATOM   1925  CE3 TRP A 250      70.255  11.403  38.860  1.00 45.80           C
ATOM   1926  CZ2 TRP A 250      72.800  11.419  37.596  1.00 45.48           C
ATOM   1927  CZ3 TRP A 250      71.330  12.128  39.383  1.00 45.77           C
ATOM   1928  CH2 TRP A 250      72.587  12.122  38.752  1.00 44.23           C
ATOM   1929  N   TRP A 251      68.680   8.745  40.129  1.00 45.99           N
ATOM   1930  CA  TRP A 251      69.608   8.698  41.259  1.00 47.63           C
ATOM   1931  C   TRP A 251      69.521   7.354  41.959  1.00 49.67           C
ATOM   1932  O   TRP A 251      70.525   6.837  42.460  1.00 48.50           O
ATOM   1933  CB  TRP A 251      69.302   9.829  42.236  1.00 44.67           C
ATOM   1934  CG  TRP A 251      70.220   9.971  43.421  1.00 44.88           C
ATOM   1935  CD1 TRP A 251      69.899   9.763  44.734  1.00 47.19           C
ATOM   1936  CD2 TRP A 251      71.588  10.409  43.409  1.00 45.75           C
ATOM   1937  NE1 TRP A 251      70.983  10.034  45.538  1.00 46.77           N
ATOM   1938  CE2 TRP A 251      72.031  10.434  44.750  1.00 45.10           C
ATOM   1939  CE3 TRP A 251      72.477  10.789  42.399  1.00 44.37           C
ATOM   1940  CZ2 TRP A 251      73.326  10.817  45.102  1.00 46.16           C
ATOM   1941  CZ3 TRP A 251      73.761  11.167  42.752  1.00 43.31           C
ATOM   1942  CH2 TRP A 251      74.174  11.172  44.091  1.00 41.59           C
ATOM   1943  N   LYS A 252      68.311   6.794  41.979  1.00 50.12           N
ATOM   1944  CA  LYS A 252      68.054   5.494  42.591  1.00 47.57           C
ATOM   1945  C   LYS A 252      68.803   4.384  41.840  1.00 49.80           C
ATOM   1946  O   LYS A 252      69.440   3.531  42.455  1.00 50.25           O
ATOM   1947  CB  LYS A 252      66.542   5.211  42.624  1.00 48.55           C
ATOM   1948  CG  LYS A 252      66.113   4.076  43.562  1.00 47.53           C
ATOM   1949  CD  LYS A 252      64.638   3.722  43.385  1.00 57.78           C
ATOM   1950  CE  LYS A 252      64.217   2.508  44.235  1.00 61.00           C
ATOM   1951  NZ  LYS A 252      64.323   2.726  45.713  1.00 61.54           N
ATOM   1952  N   ASP A 253      68.731   4.414  40.511  1.00 49.88           N
ATOM   1953  CA  ASP A 253      69.412   3.435  39.666  1.00 50.45           C
ATOM   1954  C   ASP A 253      70.946   3.477  39.781  1.00 55.96           C
ATOM   1955  O   ASP A 253      71.606   2.477  39.545  1.00 61.98           O
ATOM   1956  CB  ASP A 253      69.003   3.633  38.203  1.00 51.20           C
ATOM   1957  CG  ASP A 253      67.554   3.259  37.945  1.00 59.93           C
ATOM   1958  OD1 ASP A 253      66.928   2.599  38.809  1.00 59.25           O
ATOM   1959  OD2 ASP A 253      67.033   3.617  36.865  1.00 66.46           O
ATOM   1960  N   LEU A 254      71.510   4.630  40.128  1.00 54.95           N
ATOM   1961  CA  LEU A 254      72.947   4.734  40.362  1.00 53.63           C
ATOM   1962  C   LEU A 254      73.339   4.055  41.674  1.00 54.79           C
ATOM   1963  O   LEU A 254      74.390   3.416  41.763  1.00 55.90           O
ATOM   1964  CB  LEU A 254      73.388   6.204  40.377  1.00 50.06           C
ATOM   1965  CG  LEU A 254      73.307   6.923  39.030  1.00 51.60           C
ATOM   1966  CD1 LEU A 254      73.693   8.393  39.182  1.00 50.90           C
ATOM   1967  CD2 LEU A 254      74.189   6.239  37.992  1.00 49.61           C
ATOM   1968  N   ASP A 255      72.505   4.241  42.692  1.00 55.72           N
ATOM   1969  CA  ASP A 255      72.602   3.522  43.968  1.00 60.23           C
ATOM   1970  C   ASP A 255      73.844   3.859  44.805  1.00 59.36           C
ATOM   1971  O   ASP A 255      74.251   3.068  45.651  1.00 62.84           O
ATOM   1972  CB  ASP A 255      72.537   2.003  43.707  1.00 60.78           C
ATOM   1973  CG  ASP A 255      72.269   1.190  44.974  1.00 64.48           C
ATOM   1974  OD1 ASP A 255      71.710   1.750  45.944  1.00 63.95           O
ATOM   1975  OD2 ASP A 255      72.628  -0.009  44.997  1.00 62.35           O
ATOM   1976  N   PHE A 256      74.430   5.037  44.607  1.00 57.80           N
ATOM   1977  CA  PHE A 256      75.590   5.447  45.411  1.00 59.28           C
ATOM   1978  C   PHE A 256      75.289   5.403  46.913  1.00 60.45           C
ATOM   1979  O   PHE A 256      76.197   5.313  47.734  1.00 61.71           O
ATOM   1980  CB  PHE A 256      76.059   6.868  45.043  1.00 60.16           C
ATOM   1981  CG  PHE A 256      76.394   7.055  43.590  1.00 58.71           C
ATOM   1982  CD1 PHE A 256      76.827   5.992  42.811  1.00 56.83           C
ATOM   1983  CD2 PHE A 256      76.272   8.307  43.001  1.00 55.85           C
ATOM   1984  CE1 PHE A 256      77.129   6.173  41.471  1.00 54.03           C
ATOM   1985  CE2 PHE A 256      76.574   8.497  41.658  1.00 53.52           C
ATOM   1986  CZ  PHE A 256      77.004   7.431  40.893  1.00 56.27           C
ATOM   1987  N   VAL A 257      74.011   5.471  47.268  1.00 62.59           N
ATOM   1988  CA  VAL A 257      73.605   5.494  48.670  1.00 65.37           C
ATOM   1989  C   VAL A 257      74.024   4.206  49.389  1.00 67.00           C
ATOM   1990  O   VAL A 257      74.218   4.206  50.609  1.00 69.75           O
ATOM   1991  CB  VAL A 257      72.067   5.720  48.806  1.00 66.26           C
ATOM   1992  CG1 VAL A 257      71.287   4.566  48.184  1.00 64.59           C
ATOM   1993  CG2 VAL A 257      71.663   5.939  50.263  1.00 62.77           C
ATOM   1994  N   THR A 258      74.205   3.123  48.634  1.00 63.12           N
ATOM   1995  CA  THR A 258      74.652   1.862  49.225  1.00 63.95           C
ATOM   1996  C   THR A 258      76.110   1.519  48.863  1.00 66.49           C
ATOM   1997  O   THR A 258      76.860   1.025  49.709  1.00 66.54           O
ATOM   1998  CB  THR A 258      73.723   0.685  48.818  1.00 67.30           C
ATOM   1999  OG1 THR A 258      73.941   0.327  47.446  1.00 68.21           O
ATOM   2000  CG2 THR A 258      72.259   1.068  49.016  1.00 65.63           C
ATOM   2001  N   THR A 259      76.521   1.792  47.626  1.00 65.83           N
ATOM   2002  CA  THR A 259      77.898   1.507  47.211  1.00 63.28           C
ATOM   2003  C   THR A 259      78.893   2.614  47.605  1.00 65.21           C
ATOM   2004  O   THR A 259      80.098   2.365  47.677  1.00 65.54           O
ATOM   2005  CB  THR A 259      77.995   1.280  45.687  1.00 63.00           C
ATOM   2006  OG1 THR A 259      77.868   2.529  44.997  1.00 60.20           O
ATOM   2007  CG2 THR A 259      76.901   0.337  45.221  1.00 63.59           C
ATOM   2008  N   LEU A 260      78.399   3.827  47.856  1.00 62.63           N
ATOM   2009  CA  LEU A 260      79.258   4.917  48.336  1.00 64.28           C
ATOM   2010  C   LEU A 260      78.695   5.562  49.603  1.00 64.93           C
ATOM   2011  O   LEU A 260      78.378   6.755  49.614  1.00 64.27           O
ATOM   2012  CB  LEU A 260      79.439   5.991  47.257  1.00 60.91           C
ATOM   2013  CG  LEU A 260      80.010   5.570  45.902  1.00 60.05           C
ATOM   2014  CD1 LEU A 260      80.047   6.762  44.940  1.00 54.99           C
ATOM   2015  CD2 LEU A 260      81.390   4.961  46.076  1.00 58.67           C
ATOM   2016  N   PRO A 261      78.600   4.781  50.688  1.00 65.94           N
ATOM   2017  CA  PRO A 261      77.894   5.209  51.903  1.00 65.39           C
ATOM   2018  C   PRO A 261      78.568   6.355  52.650  1.00 64.23           C
ATOM   2019  O   PRO A 261      78.017   6.836  53.643  1.00 64.96           O
ATOM   2020  CB  PRO A 261      77.892   3.939  52.762  1.00 67.48           C
ATOM   2021  CG  PRO A 261      79.106   3.211  52.333  1.00 67.83           C
ATOM   2022  CD  PRO A 261      79.234   3.463  50.857  1.00 66.07           C
ATOM   2023  N   TYR A 262      79.740   6.784  52.196  1.00 64.33           N
ATOM   2024  CA  TYR A 262      80.413   7.910  52.835  1.00 66.61           C
ATOM   2025  C   TYR A 262      79.801   9.229  52.354  1.00 62.39           C
ATOM   2026  O   TYR A 262      79.960  10.270  52.996  1.00 63.06           O
ATOM   2027  CB  TYR A 262      81.928   7.876  52.559  1.00 62.47           C
ATOM   2028  CG  TYR A 262      82.308   7.960  51.093  1.00 59.92           C
ATOM   2029  CD1 TYR A 262      82.480   9.191  50.464  1.00 58.57           C
ATOM   2030  CD2 TYR A 262      82.502   6.814  50.340  1.00 60.32           C
ATOM   2031  CE1 TYR A 262      82.826   9.272  49.121  1.00 53.62           C
ATOM   2032  CE2 TYR A 262      82.850   6.885  48.999  1.00 58.21           C
ATOM   2033  CZ  TYR A 262      83.013   8.117  48.397  1.00 54.75           C
ATOM   2034  OH  TYR A 262      83.356   8.185  47.065  1.00 50.98           O
ATOM   2035  N   ALA A 263      79.080   9.168  51.236  1.00 60.00           N
ATOM   2036  CA  ALA A 263      78.595  10.372  50.555  1.00 62.67           C
ATOM   2037  C   ALA A 263      77.204  10.841  51.005  1.00 63.55           C
ATOM   2038  O   ALA A 263      76.322  10.026  51.289  1.00 60.82           O
ATOM   2039  CB  ALA A 263      78.593  10.137  49.049  1.00 56.33           C
ATOM   2040  N   ARG A 264      77.028  12.161  51.057  1.00 63.85           N
ATOM   2041  CA  ARG A 264      75.731  12.791  51.323  1.00 61.51           C
ATOM   2042  C   ARG A 264      74.651  12.330  50.349  1.00 59.01           C
ATOM   2043  O   ARG A 264      74.874  12.285  49.140  1.00 59.81           O
ATOM   2044  CB  ARG A 264      75.848  14.315  51.241  1.00 61.42           C
ATOM   2045  CG  ARG A 264      76.462  14.981  52.451  1.00 63.64           C
ATOM   2046  CD  ARG A 264      76.711  16.454  52.191  1.00 65.87           C
ATOM   2047  NE  ARG A 264      77.542  16.660  51.008  1.00 66.22           N
ATOM   2048  CZ  ARG A 264      78.131  17.810  50.693  1.00 67.32           C
ATOM   2049  NH1 ARG A 264      77.987  18.871  51.479  1.00 68.20           N
ATOM   2050  NH2 ARG A 264      78.870  17.896  49.592  1.00 63.12           N
ATOM   2051  N   ASP A 265      73.479  12.000  50.882  1.00 59.04           N
ATOM   2052  CA  ASP A 265      72.327  11.636  50.064  1.00 54.94           C
ATOM   2053  C   ASP A 265      71.369  12.831  49.980  1.00 54.80           C
ATOM   2054  O   ASP A 265      70.503  12.999  50.839  1.00 53.17           O
ATOM   2055  CB  ASP A 265      71.636  10.415  50.659  1.00 55.30           C
ATOM   2056  CG  ASP A 265      70.553   9.857  49.766  1.00 57.90           C
ATOM   2057  OD1 ASP A 265      70.491  10.235  48.571  1.00 53.80           O
ATOM   2058  OD2 ASP A 265      69.770   9.020  50.273  1.00 56.87           O
ATOM   2059  N   ARG A 266      71.539  13.658  48.949  1.00 52.22           N
ATOM   2060  CA  ARG A 266      70.922  14.990  48.911  1.00 52.44           C
ATOM   2061  C   ARG A 266      70.358  15.379  47.541  1.00 46.65           C
ATOM   2062  O   ARG A 266      70.426  16.545  47.155  1.00 44.97           O
ATOM   2063  CB  ARG A 266      71.944  16.066  49.324  1.00 52.80           C
ATOM   2064  CG  ARG A 266      72.494  15.981  50.749  1.00 58.39           C
ATOM   2065  CD  ARG A 266      71.477  16.407  51.807  1.00 58.89           C
ATOM   2066  NE  ARG A 266      72.051  16.347  53.151  1.00 68.11           N
ATOM   2067  CZ  ARG A 266      72.017  15.272  53.938  1.00 72.80           C
ATOM   2068  NH1 ARG A 266      71.421  14.156  53.523  1.00 64.98           N
ATOM   2069  NH2 ARG A 266      72.575  15.314  55.145  1.00 73.53           N
ATOM   2070  N   VAL A 267      69.816  14.423  46.796  1.00 44.12           N
ATOM   2071  CA  VAL A 267      69.368  14.737  45.443  1.00 43.21           C
ATOM   2072  C   VAL A 267      68.192  15.740  45.460  1.00 44.42           C
ATOM   2073  O   VAL A 267      68.036  16.542  44.527  1.00 39.50           O
ATOM   2074  CB  VAL A 267      68.970  13.465  44.673  1.00 42.11           C
ATOM   2075  CG1 VAL A 267      67.672  12.889  45.222  1.00 43.03           C
ATOM   2076  CG2 VAL A 267      68.825  13.756  43.197  1.00 42.02           C
ATOM   2077  N   VAL A 268      67.391  15.730  46.526  1.00 40.51           N
ATOM   2078  CA  VAL A 268      66.255  16.641  46.601  1.00 41.26           C
ATOM   2079  C   VAL A 268      66.734  18.073  46.885  1.00 41.06           C
ATOM   2080  O   VAL A 268      66.209  19.040  46.325  1.00 35.96           O
ATOM   2081  CB  VAL A 268      65.236  16.202  47.677  1.00 40.84           C
ATOM   2082  CG1 VAL A 268      64.091  17.195  47.760  1.00 33.22           C
ATOM   2083  CG2 VAL A 268      64.708  14.782  47.383  1.00 37.70           C
ATOM   2084  N   GLU A 269      67.725  18.208  47.758  1.00 42.07           N
ATOM   2085  CA  GLU A 269      68.312  19.518  48.024  1.00 42.25           C
ATOM   2086  C   GLU A 269      68.967  20.057  46.750  1.00 39.73           C
ATOM   2087  O   GLU A 269      68.873  21.253  46.447  1.00 37.16           O
ATOM   2088  CB  GLU A 269      69.321  19.440  49.168  1.00 41.06           C
ATOM   2089  CG  GLU A 269      68.703  19.213  50.546  1.00 44.40           C
ATOM   2090  CD  GLU A 269      68.099  17.810  50.742  1.00 48.40           C
ATOM   2091  OE1 GLU A 269      68.273  16.925  49.870  1.00 41.11           O
ATOM   2092  OE2 GLU A 269      67.452  17.595  51.791  1.00 47.68           O
ATOM   2093  N   CYS A 270      69.593  19.163  45.985  1.00 37.48           N
ATOM   2094  CA  CYS A 270      70.159  19.541  44.699  1.00 36.02           C
ATOM   2095  C   CYS A 270      69.090  19.992  43.720  1.00 37.32           C
ATOM   2096  O   CYS A 270      69.324  20.933  42.956  1.00 34.30           O
ATOM   2097  CB  CYS A 270      70.960  18.390  44.097  1.00 38.86           C
ATOM   2098  SG  CYS A 270      72.438  17.985  45.057  1.00 45.04           S
ATOM   2099  N   TYR A 271      67.921  19.336  43.731  1.00 37.59           N
ATOM   2100  CA  TYR A 271      66.851  19.740  42.824  1.00 31.51           C
ATOM   2101  C   TYR A 271      66.358  21.135  43.186  1.00 32.68           C
ATOM   2102  O   TYR A 271      66.026  21.926  42.304  1.00 32.07           O
ATOM   2103  CB  TYR A 271      65.661  18.764  42.825  1.00 36.74           C
ATOM   2104  CG  TYR A 271      64.602  19.234  41.855  1.00 31.26           C
ATOM   2105  CD1 TYR A 271      64.711  18.966  40.499  1.00 33.42           C
ATOM   2106  CD2 TYR A 271      63.556  20.034  42.275  1.00 32.55           C
ATOM   2107  CE1 TYR A 271      63.767  19.437  39.598  1.00 31.65           C
ATOM   2108  CE2 TYR A 271      62.621  20.505  41.385  1.00 33.76           C
ATOM   2109  CZ  TYR A 271      62.732  20.202  40.045  1.00 33.19           C
ATOM   2110  OH  TYR A 271      61.792  20.688  39.154  1.00 36.56           O
ATOM   2111  N   PHE A 272      66.283  21.419  44.484  1.00 32.35           N
ATOM   2112  CA  PHE A 272      65.853  22.729  44.950  1.00 33.70           C
ATOM   2113  C   PHE A 272      66.816  23.805  44.407  1.00 32.91           C
ATOM   2114  O   PHE A 272      66.382  24.866  43.960  1.00 31.95           O
ATOM   2115  CB  PHE A 272      65.783  22.768  46.482  1.00 31.19           C
ATOM   2116  CG  PHE A 272      65.684  24.166  47.050  1.00 36.34           C
ATOM   2117  CD1 PHE A 272      64.453  24.804  47.150  1.00 31.81           C
ATOM   2118  CD2 PHE A 272      66.834  24.851  47.459  1.00 32.15           C
ATOM   2119  CE1 PHE A 272      64.361  26.105  47.655  1.00 31.89           C
ATOM   2120  CE2 PHE A 272      66.749  26.130  47.972  1.00 32.27           C
ATOM   2121  CZ  PHE A 272      65.500  26.764  48.065  1.00 33.24           C
ATOM   2122  N   GLU A 273      68.112  23.515  44.405  1.00 30.18           N
ATOM   2123  CA  GLU A 273      69.082  24.481  43.879  1.00 34.63           C
ATOM   2124  C   GLU A 273      68.843  24.746  42.413  1.00 32.28           C
ATOM   2125  O   GLU A 273      68.748  25.901  41.995  1.00 31.95           O
ATOM   2126  CB  GLU A 273      70.511  24.006  44.079  1.00 29.57           C
ATOM   2127  CG  GLU A 273      70.943  24.084  45.502  1.00 38.26           C
ATOM   2128  CD  GLU A 273      72.446  23.972  45.657  1.00 51.94           C
ATOM   2129  OE1 GLU A 273      73.159  23.947  44.626  1.00 53.39           O
ATOM   2130  OE2 GLU A 273      72.909  23.904  46.815  1.00 63.91           O
ATOM   2131  N   ALA A 274      68.729  23.676  41.639  1.00 29.83           N
ATOM   2132  CA  ALA A 274      68.389  23.805  40.227  1.00 34.19           C
ATOM   2133  C   ALA A 274      67.084  24.587  40.027  1.00 31.74           C
ATOM   2134  O   ALA A 274      66.981  25.399  39.106  1.00 31.57           O
ATOM   2135  CB  ALA A 274      68.286  22.436  39.585  1.00 31.95           C
ATOM   2136  N   LEU A 275      66.096  24.353  40.890  1.00 30.26           N
ATOM   2137  CA  LEU A 275      64.803  25.048  40.766  1.00 31.49           C
ATOM   2138  C   LEU A 275      64.931  26.547  41.075  1.00 31.43           C
ATOM   2139  O   LEU A 275      64.158  27.355  40.578  1.00 29.63           O
ATOM   2140  CB  LEU A 275      63.761  24.411  41.691  1.00 27.32           C
ATOM   2141  CG  LEU A 275      62.327  24.941  41.641  1.00 31.85           C
ATOM   2142  CD1 LEU A 275      61.775  24.966  40.220  1.00 29.86           C
ATOM   2143  CD2 LEU A 275      61.428  24.115  42.561  1.00 30.03           C
ATOM   2144  N   GLY A 276      65.895  26.896  41.925  1.00 28.47           N
ATOM   2145  CA  GLY A 276      66.161  28.279  42.262  1.00 28.91           C
ATOM   2146  C   GLY A 276      66.864  29.013  41.127  1.00 33.14           C
ATOM   2147  O   GLY A 276      66.730  30.237  41.004  1.00 29.56           O
ATOM   2148  N   VAL A 277      67.605  28.269  40.298  1.00 30.26           N
ATOM   2149  CA  VAL A 277      68.288  28.842  39.138  1.00 28.80           C
ATOM   2150  C   VAL A 277      67.315  29.209  38.010  1.00 32.16           C
ATOM   2151  O   VAL A 277      67.462  30.247  37.369  1.00 31.90           O
ATOM   2152  CB  VAL A 277      69.373  27.876  38.583  1.00 29.16           C
ATOM   2153  CG1 VAL A 277      69.928  28.402  37.279  1.00 27.03           C
ATOM   2154  CG2 VAL A 277      70.497  27.711  39.588  1.00 23.44           C
ATOM   2155  N   TYR A 278      66.319  28.360  37.765  1.00 31.20           N
ATOM   2156  CA  TYR A 278      65.225  28.687  36.841  1.00 29.45           C
ATOM   2157  C   TYR A 278      63.992  27.815  37.143  1.00 33.29           C
ATOM   2158  O   TYR A 278      64.118  26.618  37.402  1.00 32.12           O
ATOM   2159  CB  TYR A 278      65.651  28.531  35.373  1.00 29.27           C
ATOM   2160  CG  TYR A 278      66.798  27.585  35.125  1.00 32.47           C
ATOM   2161  CD1 TYR A 278      66.796  26.289  35.634  1.00 34.44           C
ATOM   2162  CD2 TYR A 278      67.845  27.960  34.276  1.00 32.11           C
ATOM   2163  CE1 TYR A 278      67.872  25.421  35.389  1.00 35.95           C
ATOM   2164  CE2 TYR A 278      68.906  27.095  34.011  1.00 36.26           C
ATOM   2165  CZ  TYR A 278      68.894  25.815  34.583  1.00 33.30           C
ATOM   2166  OH  TYR A 278      69.973  25.000  34.281  1.00 39.53           O
ATOM   2167  N   PHE A 279      62.798  28.400  37.124  1.00 33.85           N
ATOM   2168  CA  PHE A 279      61.610  27.600  37.437  1.00 33.76           C
ATOM   2169  C   PHE A 279      60.656  27.446  36.252  1.00 34.28           C
ATOM   2170  O   PHE A 279      59.788  26.564  36.259  1.00 34.56           O
ATOM   2171  CB  PHE A 279      60.844  28.195  38.622  1.00 29.02           C
ATOM   2172  CG  PHE A 279      60.210  29.518  38.319  1.00 31.58           C
ATOM   2173  CD1 PHE A 279      58.928  29.587  37.793  1.00 29.18           C
ATOM   2174  CD2 PHE A 279      60.913  30.696  38.524  1.00 30.35           C
ATOM   2175  CE1 PHE A 279      58.372  30.809  37.486  1.00 36.63           C
ATOM   2176  CE2 PHE A 279      60.359  31.910  38.226  1.00 33.04           C
ATOM   2177  CZ  PHE A 279      59.087  31.975  37.712  1.00 32.41           C
ATOM   2178  N   GLU A 280      60.803  28.307  35.249  1.00 32.84           N
ATOM   2179  CA  GLU A 280      59.916  28.298  34.087  1.00 32.38           C
ATOM   2180  C   GLU A 280      59.950  26.935  33.358  1.00 37.15           C
ATOM   2181  O   GLU A 280      60.988  26.241  33.368  1.00 37.39           O
ATOM   2182  CB  GLU A 280      60.290  29.440  33.136  1.00 36.22           C
ATOM   2183  CG  GLU A 280      60.226  30.851  33.748  1.00 35.71           C
ATOM   2184  CD  GLU A 280      61.567  31.338  34.328  1.00 41.53           C
ATOM   2185  OE1 GLU A 280      62.346  30.514  34.879  1.00 33.73           O
ATOM   2186  OE2 GLU A 280      61.837  32.563  34.243  1.00 41.99           O
ATOM   2187  N   PRO A 281      58.813  26.535  32.742  1.00 37.69           N
ATOM   2188  CA  PRO A 281      58.706  25.212  32.102  1.00 38.06           C
ATOM   2189  C   PRO A 281      59.648  25.048  30.912  1.00 38.86           C
ATOM   2190  O   PRO A 281      60.099  23.939  30.624  1.00 40.14           O
ATOM   2191  CB  PRO A 281      57.236  25.153  31.642  1.00 36.38           C
ATOM   2192  CG  PRO A 281      56.808  26.590  31.558  1.00 39.51           C
ATOM   2193  CD  PRO A 281      57.544  27.288  32.656  1.00 37.35           C
ATOM   2194  N   GLN A 282      59.954  26.146  30.235  1.00 39.04           N
ATOM   2195  CA  GLN A 282      60.844  26.108  29.083  1.00 39.52           C
ATOM   2196  C   GLN A 282      62.280  25.703  29.455  1.00 42.29           C
ATOM   2197  O   GLN A 282      63.091  25.438  28.577  1.00 43.57           O
ATOM   2198  CB  GLN A 282      60.867  27.468  28.412  1.00 42.46           C
ATOM   2199  CG  GLN A 282      61.665  28.467  29.220  1.00 44.85           C
ATOM   2200  CD  GLN A 282      61.413  29.894  28.822  1.00 54.10           C
ATOM   2201  OE1 GLN A 282      62.216  30.494  28.099  1.00 63.60           O
ATOM   2202  NE2 GLN A 282      60.302  30.469  29.309  1.00 47.67           N
ATOM   2203  N   TYR A 283      62.588  25.670  30.749  1.00 41.07           N
ATOM   2204  CA  TYR A 283      63.915  25.279  31.225  1.00 40.29           C
ATOM   2205  C   TYR A 283      63.886  23.911  31.893  1.00 38.18           C
ATOM   2206  O   TYR A 283      64.777  23.572  32.681  1.00 36.82           O
ATOM   2207  CB  TYR A 283      64.477  26.316  32.204  1.00 35.70           C
ATOM   2208  CG  TYR A 283      64.653  27.674  31.591  1.00 37.80           C
ATOM   2209  CD1 TYR A 283      65.442  27.840  30.462  1.00 39.98           C
ATOM   2210  CD2 TYR A 283      64.056  28.795  32.144  1.00 38.13           C
ATOM   2211  CE1 TYR A 283      65.619  29.071  29.883  1.00 40.66           C
ATOM   2212  CE2 TYR A 283      64.226  30.052  31.563  1.00 39.54           C
ATOM   2213  CZ  TYR A 283      65.012  30.178  30.434  1.00 43.61           C
ATOM   2214  OH  TYR A 283      65.200  31.404  29.841  1.00 44.45           O
ATOM   2215  N   SER A 284      62.861  23.128  31.581  1.00 36.68           N
ATOM   2216  CA  SER A 284      62.726  21.807  32.171  1.00 34.93           C
ATOM   2217  C   SER A 284      63.937  20.943  31.827  1.00 35.33           C
ATOM   2218  O   SER A 284      64.519  20.312  32.708  1.00 35.68           O
ATOM   2219  CB  SER A 284      61.417  21.128  31.707  1.00 37.39           C
ATOM   2220  OG  SER A 284      61.266  19.834  32.295  1.00 32.86           O
ATOM   2221  N   GLN A 285      64.336  20.926  30.559  1.00 36.91           N
ATOM   2222  CA  GLN A 285      65.494  20.122  30.178  1.00 42.75           C
ATOM   2223  C   GLN A 285      66.753  20.609  30.898  1.00 42.31           C
ATOM   2224  O   GLN A 285      67.549  19.805  31.401  1.00 40.94           O
ATOM   2225  CB  GLN A 285      65.728  20.143  28.663  1.00 41.91           C
ATOM   2226  CG  GLN A 285      66.897  19.234  28.259  1.00 48.64           C
ATOM   2227  CD  GLN A 285      67.226  19.290  26.780  1.00 49.23           C
ATOM   2228  OE1 GLN A 285      66.743  20.155  26.053  1.00 52.40           O
ATOM   2229  NE2 GLN A 285      68.051  18.359  26.328  1.00 49.58           N
ATOM   2230  N   ALA A 286      66.913  21.929  30.946  1.00 39.90           N
ATOM   2231  CA  ALA A 286      68.049  22.569  31.613  1.00 36.69           C
ATOM   2232  C   ALA A 286      68.105  22.258  33.103  1.00 36.73           C
ATOM   2233  O   ALA A 286      69.187  22.133  33.660  1.00 38.50           O
ATOM   2234  CB  ALA A 286      67.996  24.088  31.394  1.00 33.87           C
ATOM   2235  N   ARG A 287      66.940  22.136  33.743  1.00 38.27           N
ATOM   2236  CA  ARG A 287      66.866  21.867  35.178  1.00 35.08           C
ATOM   2237  C   ARG A 287      67.335  20.466  35.462  1.00 32.88           C
ATOM   2238  O   ARG A 287      68.144  20.263  36.343  1.00 34.86           O
ATOM   2239  CB  ARG A 287      65.429  22.052  35.724  1.00 36.01           C
ATOM   2240  CG  ARG A 287      65.161  23.337  36.468  1.00 37.64           C
ATOM   2241  CD  ARG A 287      63.841  23.317  37.222  1.00 33.75           C
ATOM   2242  NE  ARG A 287      62.733  22.996  36.329  1.00 33.24           N
ATOM   2243  CZ  ARG A 287      62.155  23.864  35.507  1.00 37.34           C
ATOM   2244  NH1 ARG A 287      62.608  25.112  35.451  1.00 35.58           N
ATOM   2245  NH2 ARG A 287      61.148  23.479  34.727  1.00 35.19           N
ATOM   2246  N   VAL A 288      66.826  19.494  34.709  1.00 37.23           N
ATOM   2247  CA  VAL A 288      67.202  18.097  34.921  1.00 36.15           C
ATOM   2248  C   VAL A 288      68.712  17.893  34.724  1.00 36.39           C
ATOM   2249  O   VAL A 288      69.373  17.242  35.549  1.00 36.02           O
ATOM   2250  CB  VAL A 288      66.432  17.161  33.980  1.00 39.48           C
ATOM   2251  CG1 VAL A 288      66.894  15.729  34.168  1.00 34.34           C
ATOM   2252  CG2 VAL A 288      64.921  17.286  34.233  1.00 38.38           C
ATOM   2253  N   MET A 289      69.263  18.447  33.644  1.00 34.39           N
ATOM   2254  CA  MET A 289      70.709  18.335  33.426  1.00 38.40           C
ATOM   2255  C   MET A 289      71.461  18.953  34.597  1.00 36.90           C
ATOM   2256  O   MET A 289      72.447  18.393  35.050  1.00 37.74           O
ATOM   2257  CB  MET A 289      71.130  19.011  32.125  1.00 38.21           C
ATOM   2258  CG  MET A 289      70.510  18.416  30.884  1.00 40.19           C
ATOM   2259  SD  MET A 289      70.857  19.381  29.399  1.00 46.18           S
ATOM   2260  CE  MET A 289      72.435  18.682  28.896  1.00 42.67           C
ATOM   2261  N   LEU A 290      70.973  20.094  35.100  1.00 34.92           N
ATOM   2262  CA  LEU A 290      71.672  20.831  36.160  1.00 36.10           C
ATOM   2263  C   LEU A 290      71.714  20.054  37.473  1.00 36.29           C
ATOM   2264  O   LEU A 290      72.781  19.958  38.093  1.00 34.17           O
ATOM   2265  CB  LEU A 290      71.020  22.211  36.394  1.00 35.95           C
ATOM   2266  CG  LEU A 290      71.633  23.121  37.479  1.00 34.62           C
ATOM   2267  CD1 LEU A 290      73.143  23.305  37.322  1.00 29.94           C
ATOM   2268  CD2 LEU A 290      70.935  24.488  37.508  1.00 30.38           C
ATOM   2269  N   VAL A 291      70.565  19.517  37.902  1.00 31.19           N
ATOM   2270  CA  VAL A 291      70.504  18.723  39.137  1.00 33.95           C
ATOM   2271  C   VAL A 291      71.450  17.547  39.106  1.00 31.41           C
ATOM   2272  O   VAL A 291      72.028  17.185  40.124  1.00 35.31           O
ATOM   2273  CB  VAL A 291      69.104  18.100  39.426  1.00 36.14           C
ATOM   2274  CG1 VAL A 291      69.002  17.750  40.904  1.00 35.34           C
ATOM   2275  CG2 VAL A 291      68.005  19.008  39.036  1.00 40.84           C
ATOM   2276  N   LYS A 292      71.561  16.916  37.943  1.00 31.05           N
ATOM   2277  CA  LYS A 292      72.434  15.753  37.803  1.00 39.49           C
ATOM   2278  C   LYS A 292      73.884  16.136  38.063  1.00 37.94           C
ATOM   2279  O   LYS A 292      74.607  15.428  38.761  1.00 39.21           O
ATOM   2280  CB  LYS A 292      72.269  15.127  36.420  1.00 37.57           C
ATOM   2281  CG  LYS A 292      71.069  14.205  36.335  1.00 38.76           C
ATOM   2282  CD  LYS A 292      70.637  13.982  34.905  1.00 40.79           C
ATOM   2283  CE  LYS A 292      69.549  12.926  34.822  1.00 41.19           C
ATOM   2284  NZ  LYS A 292      68.930  12.948  33.471  1.00 41.69           N
ATOM   2285  N   THR A 293      74.297  17.283  37.532  1.00 39.90           N
ATOM   2286  CA  THR A 293      75.653  17.783  37.774  1.00 35.38           C
ATOM   2287  C   THR A 293      75.856  18.150  39.244  1.00 37.54           C
ATOM   2288  O   THR A 293      76.850  17.748  39.853  1.00 34.67           O
ATOM   2289  CB  THR A 293      75.943  18.990  36.902  1.00 34.62           C
ATOM   2290  OG1 THR A 293      76.171  18.553  35.557  1.00 37.26           O
ATOM   2291  CG2 THR A 293      77.137  19.752  37.422  1.00 32.55           C
ATOM   2292  N   ILE A 294      74.906  18.889  39.826  1.00 34.91           N
ATOM   2293  CA  ILE A 294      75.035  19.269  41.232  1.00 32.04           C
ATOM   2294  C   ILE A 294      75.166  18.022  42.119  1.00 39.11           C
ATOM   2295  O   ILE A 294      76.004  17.984  43.024  1.00 39.34           O
ATOM   2296  CB  ILE A 294      73.855  20.111  41.692  1.00 33.98           C
ATOM   2297  CG1 ILE A 294      73.790  21.415  40.886  1.00 37.12           C
ATOM   2298  CG2 ILE A 294      73.996  20.429  43.162  1.00 35.08           C
ATOM   2299  CD1 ILE A 294      72.622  22.313  41.251  1.00 33.90           C
ATOM   2300  N   SER A 295      74.352  17.000  41.822  1.00 33.80           N
ATOM   2301  CA  SER A 295      74.391  15.716  42.518  1.00 38.77           C
ATOM   2302  C   SER A 295      75.732  15.038  42.365  1.00 36.57           C
ATOM   2303  O   SER A 295      76.328  14.605  43.347  1.00 38.01           O
ATOM   2304  CB  SER A 295      73.310  14.747  41.993  1.00 36.49           C
ATOM   2305  OG  SER A 295      72.009  15.233  42.233  1.00 43.12           O
ATOM   2306  N   MET A 296      76.182  14.916  41.121  1.00 35.67           N
ATOM   2307  CA  MET A 296      77.435  14.221  40.843  1.00 39.29           C
ATOM   2308  C   MET A 296      78.641  14.914  41.451  1.00 38.80           C
ATOM   2309  O   MET A 296      79.479  14.242  42.030  1.00 42.63           O
ATOM   2310  CB  MET A 296      77.660  14.062  39.344  1.00 39.08           C
ATOM   2311  CG  MET A 296      78.613  12.940  39.031  1.00 47.65           C
ATOM   2312  SD  MET A 296      77.885  11.343  39.502  1.00 50.55           S
ATOM   2313  CE  MET A 296      76.619  11.196  38.258  1.00 42.99           C
ATOM   2314  O   ILE A 297      80.943  17.014  44.033  1.00 42.43           O
ATOM   2315  N   ILE A 297      78.739  16.242  41.332  1.00 38.24           N
ATOM   2316  CA  ILE A 297      79.919  16.939  41.856  1.00 38.74           C
ATOM   2317  C   ILE A 297      79.904  16.904  43.384  1.00 40.83           C
ATOM   2318  CB  ILE A 297      80.031  18.408  41.351  1.00 39.72           C
ATOM   2319  CG1 ILE A 297      81.460  18.930  41.548  1.00 37.13           C
ATOM   2320  CG2 ILE A 297      79.043  19.336  42.044  1.00 33.31           C
ATOM   2321  CD1 ILE A 297      82.495  18.140  40.781  1.00 36.24           C
ATOM   2322  N   SER A 298      78.723  16.712  43.957  1.00 39.94           N
ATOM   2323  CA  SER A 298      78.609  16.589  45.401  1.00 45.41           C
ATOM   2324  C   SER A 298      79.252  15.290  45.884  1.00 45.41           C
ATOM   2325  O   SER A 298      79.825  15.238  46.977  1.00 43.92           O
ATOM   2326  CB  SER A 298      77.139  16.644  45.828  1.00 49.69           C
ATOM   2327  OG  SER A 298      77.024  16.558  47.238  1.00 57.17           O
ATOM   2328  N   ILE A 299      79.142  14.247  45.064  1.00 41.25           N
ATOM   2329  CA  ILE A 299      79.775  12.965  45.358  1.00 46.78           C
ATOM   2330  C   ILE A 299      81.295  13.116  45.368  1.00 46.88           C
ATOM   2331  O   ILE A 299      81.970  12.690  46.311  1.00 46.07           O
ATOM   2332  CB  ILE A 299      79.386  11.887  44.332  1.00 46.22           C
ATOM   2333  CG1 ILE A 299      77.886  11.601  44.397  1.00 48.66           C
ATOM   2334  CG2 ILE A 299      80.154  10.609  44.594  1.00 48.91           C
ATOM   2335  CD1 ILE A 299      77.389  11.306  45.799  1.00 49.85           C
ATOM   2336  N   VAL A 300      81.820  13.735  44.313  1.00 43.77           N
ATOM   2337  CA  VAL A 300      83.250  14.000  44.204  1.00 46.38           C
ATOM   2338  C   VAL A 300      83.757  14.768  45.417  1.00 42.82           C
ATOM   2339  O   VAL A 300      84.802  14.447  45.959  1.00 46.59           O
ATOM   2340  CB  VAL A 300      83.582  14.794  42.932  1.00 43.79           C
ATOM   2341  CG1 VAL A 300      85.050  15.160  42.906  1.00 44.47           C
ATOM   2342  CG2 VAL A 300      83.189  14.005  41.691  1.00 41.63           C
ATOM   2343  N   ASP A 301      83.000  15.766  45.858  1.00 44.90           N
ATOM   2344  CA  ASP A 301      83.422  16.591  46.986  1.00 45.09           C
ATOM   2345  C   ASP A 301      83.516  15.787  48.272  1.00 49.20           C
ATOM   2346  O   ASP A 301      84.440  15.982  49.062  1.00 51.65           O
ATOM   2347  CB  ASP A 301      82.472  17.772  47.196  1.00 42.66           C
ATOM   2348  CG  ASP A 301      82.877  18.641  48.383  1.00 49.22           C
ATOM   2349  OD1 ASP A 301      81.982  19.109  49.112  1.00 58.80           O
ATOM   2350  OD2 ASP A 301      84.089  18.860  48.598  1.00 50.80           O
ATOM   2351  N   ASP A 302      82.559  14.887  48.486  1.00 50.46           N
ATOM   2352  CA  ASP A 302      82.580  14.028  49.667  1.00 51.81           C
ATOM   2353  C   ASP A 302      83.768  13.060  49.623  1.00 51.77           C
ATOM   2354  O   ASP A 302      84.375  12.761  50.652  1.00 54.14           O
ATOM   2355  CB  ASP A 302      81.268  13.257  49.791  1.00 54.15           C
ATOM   2356  CG  ASP A 302      80.092  14.160  50.140  1.00 61.19           C
ATOM   2357  OD1 ASP A 302      80.330  15.272  50.667  1.00 58.56           O
ATOM   2358  OD2 ASP A 302      78.934  13.747  49.889  1.00 60.45           O
ATOM   2359  N   THR A 303      84.086  12.582  48.423  1.00 45.59           N
ATOM   2360  CA  THR A 303      85.248  11.731  48.205  1.00 50.12           C
ATOM   2361  C   THR A 303      86.535  12.405  48.674  1.00 53.02           C
ATOM   2362  O   THR A 303      87.314  11.805  49.412  1.00 54.66           O
ATOM   2363  CB  THR A 303      85.397  11.366  46.726  1.00 49.82           C
ATOM   2364  OG1 THR A 303      84.174  10.786  46.253  1.00 45.69           O
ATOM   2365  CG2 THR A 303      86.550  10.386  46.530  1.00 51.46           C
ATOM   2366  N   PHE A 304      86.740  13.653  48.246  1.00 46.54           N
ATOM   2367  CA  PHE A 304      87.912  14.440  48.637  1.00 47.50           C
ATOM   2368  C   PHE A 304      87.935  14.802  50.113  1.00 50.75           C
ATOM   2369  O   PHE A 304      88.994  14.825  50.733  1.00 54.94           O
ATOM   2370  CB  PHE A 304      87.990  15.737  47.825  1.00 43.67           C
ATOM   2371  CG  PHE A 304      88.663  15.582  46.505  1.00 42.58           C
ATOM   2372  CD1 PHE A 304      90.031  15.790  46.381  1.00 44.36           C
ATOM   2373  CD2 PHE A 304      87.938  15.238  45.385  1.00 41.14           C
ATOM   2374  CE1 PHE A 304      90.655  15.649  45.158  1.00 42.14           C
ATOM   2375  CE2 PHE A 304      88.552  15.093  44.160  1.00 43.75           C
ATOM   2376  CZ  PHE A 304      89.913  15.300  44.042  1.00 42.31           C
ATOM   2377  N   ASP A 305      86.774  15.102  50.679  1.00 54.12           N
ATOM   2378  CA  ASP A 305      86.753  15.757  51.980  1.00 60.12           C
ATOM   2379  C   ASP A 305      86.685  14.778  53.134  1.00 62.89           C
ATOM   2380  O   ASP A 305      87.142  15.082  54.239  1.00 65.82           O
ATOM   2381  CB  ASP A 305      85.578  16.734  52.077  1.00 61.27           C
ATOM   2382  CG  ASP A 305      85.686  17.649  53.287  1.00 70.51           C
ATOM   2383  OD1 ASP A 305      86.310  18.727  53.165  1.00 77.81           O
ATOM   2384  OD2 ASP A 305      85.155  17.289  54.361  1.00 70.31           O
ATOM   2385  O   ALA A 306      85.439  10.367  54.313  1.00 74.35           O
ATOM   2386  N   ALA A 306      86.122  13.602  52.886  1.00 63.70           N
ATOM   2387  CA  ALA A 306      85.822  12.701  53.988  1.00 69.53           C
ATOM   2388  C   ALA A 306      86.052  11.225  53.682  1.00 69.12           C
ATOM   2389  CB  ALA A 306      84.373  12.914  54.438  1.00 70.63           C
ATOM   2390  O   TYR A 307      89.350   8.515  52.521  1.00 75.31           O
ATOM   2391  N   TYR A 307      86.925  10.906  52.735  1.00 64.59           N
ATOM   2392  CA  TYR A 307      87.152   9.494  52.460  1.00 67.97           C
ATOM   2393  C   TYR A 307      88.525   9.160  51.865  1.00 70.26           C
ATOM   2394  CB  TYR A 307      86.049   8.967  51.540  1.00 62.79           C
ATOM   2395  CG  TYR A 307      85.861   7.471  51.645  1.00 69.62           C
ATOM   2396  CD1 TYR A 307      85.354   6.894  52.808  1.00 71.33           C
ATOM   2397  CD2 TYR A 307      86.205   6.628  50.590  1.00 70.46           C
ATOM   2398  CE1 TYR A 307      85.188   5.519  52.915  1.00 68.54           C
ATOM   2399  CE2 TYR A 307      86.038   5.250  50.688  1.00 70.31           C
ATOM   2400  CZ  TYR A 307      85.531   4.703  51.853  1.00 72.08           C
ATOM   2401  OH  TYR A 307      85.365   3.336  51.951  1.00 78.57           O
ATOM   2402  O   GLY A 308      91.321  10.695  51.289  1.00 61.57           O
ATOM   2403  N   GLY A 308      88.758   9.580  50.624  1.00 65.35           N
ATOM   2404  CA  GLY A 308      89.984   9.248  49.915  1.00 66.72           C
ATOM   2405  C   GLY A 308      91.287   9.702  50.558  1.00 64.29           C
ATOM   2406  O   THR A 309      94.023  10.144  48.478  1.00 62.13           O
ATOM   2407  N   THR A 309      92.356   8.953  50.280  1.00 63.61           N
ATOM   2408  CA  THR A 309      93.724   9.284  50.702  1.00 65.83           C
ATOM   2409  C   THR A 309      94.453  10.106  49.637  1.00 64.14           C
ATOM   2410  CB  THR A 309      94.569   8.014  50.977  1.00 64.66           C
ATOM   2411  OG1 THR A 309      94.752   7.297  49.751  1.00 60.48           O
ATOM   2412  CG2 THR A 309      93.898   7.109  52.012  1.00 66.56           C
ATOM   2413  O   VAL A 310      96.468  11.751  46.730  1.00 61.74           O
ATOM   2414  N   VAL A 310      95.573  10.722  50.023  1.00 65.07           N
ATOM   2415  CA  VAL A 310      96.351  11.596  49.134  1.00 64.26           C
ATOM   2416  C   VAL A 310      96.594  11.036  47.731  1.00 64.40           C
ATOM   2417  CB  VAL A 310      97.735  11.910  49.735  1.00 70.28           C
ATOM   2418  CG1 VAL A 310      98.363  13.099  49.025  1.00 62.24           C
ATOM   2419  CG2 VAL A 310      97.627  12.167  51.222  1.00 68.64           C
ATOM   2420  O   LYS A 311      96.194   8.786  44.355  1.00 61.60           O
ATOM   2421  N   LYS A 311      96.941   9.755  47.667  1.00 64.08           N
ATOM   2422  CA  LYS A 311      97.380   9.140  46.415  1.00 64.70           C
ATOM   2423  C   LYS A 311      96.169   8.728  45.589  1.00 59.24           C
ATOM   2424  CB  LYS A 311      98.286   7.927  46.673  1.00 68.58           C
ATOM   2425  CG  LYS A 311      98.787   7.752  48.112  1.00 70.23           C
ATOM   2426  CD  LYS A 311      99.618   8.926  48.640  1.00 74.14           C
ATOM   2427  CE  LYS A 311     100.057   8.660  50.069  1.00 77.78           C
ATOM   2428  NZ  LYS A 311      98.848   8.553  50.937  1.00 84.31           N
ATOM   2429  O   GLU A 312      92.859   9.339  43.813  1.00 52.81           O
ATOM   2430  N   GLU A 312      95.109   8.308  46.274  1.00 60.71           N
ATOM   2431  CA  GLU A 312      93.833   8.061  45.616  1.00 57.02           C
ATOM   2432  C   GLU A 312      93.309   9.343  44.967  1.00 54.78           C
ATOM   2433  CB  GLU A 312      92.812   7.524  46.611  1.00 61.16           C
ATOM   2434  CG  GLU A 312      93.078   6.120  47.090  1.00 64.36           C
ATOM   2435  CD  GLU A 312      91.994   5.622  48.018  1.00 69.21           C
ATOM   2436  OE1 GLU A 312      91.505   6.425  48.843  1.00 69.67           O
ATOM   2437  OE2 GLU A 312      91.628   4.429  47.918  1.00 74.17           O
ATOM   2438  O   LEU A 313      93.135  12.723  43.039  1.00 46.30           O
ATOM   2439  N   LEU A 313      93.377  10.443  45.712  1.00 52.01           N
ATOM   2440  CA  LEU A 313      92.879  11.720  45.211  1.00 54.80           C
ATOM   2441  C   LEU A 313      93.702  12.206  44.009  1.00 52.02           C
ATOM   2442  CB  LEU A 313      92.864  12.769  46.329  1.00 49.12           C
ATOM   2443  CG  LEU A 313      91.985  12.421  47.541  1.00 51.85           C
ATOM   2444  CD1 LEU A 313      92.048  13.504  48.604  1.00 53.20           C
ATOM   2445  CD2 LEU A 313      90.536  12.152  47.132  1.00 47.64           C
ATOM   2446  O   GLU A 314      95.441  12.166  40.574  1.00 52.51           O
ATOM   2447  N   GLU A 314      95.023  12.010  44.049  1.00 55.10           N
ATOM   2448  CA  GLU A 314      95.883  12.416  42.932  1.00 51.71           C
ATOM   2449  C   GLU A 314      95.543  11.611  41.676  1.00 55.35           C
ATOM   2450  CB  GLU A 314      97.367  12.257  43.291  1.00 56.57           C
ATOM   2451  CG  GLU A 314      98.327  12.850  42.251  1.00 56.21           C
ATOM   2452  CD  GLU A 314      98.226  14.377  42.152  1.00 67.01           C
ATOM   2453  OE1 GLU A 314      98.519  15.068  43.164  1.00 61.56           O
ATOM   2454  OE2 GLU A 314      97.841  14.883  41.064  1.00 64.74           O
ATOM   2455  O   ALA A 315      93.384   9.944  38.979  1.00 50.60           O
ATOM   2456  N   ALA A 315      95.344  10.307  41.856  1.00 53.04           N
ATOM   2457  CA  ALA A 315      94.931   9.434  40.767  1.00 53.84           C
ATOM   2458  C   ALA A 315      93.574   9.859  40.199  1.00 52.59           C
ATOM   2459  CB  ALA A 315      94.880   7.985  41.245  1.00 54.81           C
ATOM   2460  O   TYR A 316      90.945  12.035  38.766  1.00 41.83           O
ATOM   2461  N   TYR A 316      92.628  10.114  41.096  1.00 52.21           N
ATOM   2462  CA  TYR A 316      91.322  10.640  40.713  1.00 50.50           C
ATOM   2463  C   TYR A 316      91.466  11.932  39.888  1.00 46.79           C
ATOM   2464  CB  TYR A 316      90.485  10.887  41.966  1.00 53.72           C
ATOM   2465  CG  TYR A 316      88.991  10.875  41.735  1.00 54.59           C
ATOM   2466  CD1 TYR A 316      88.304   9.676  41.617  1.00 55.15           C
ATOM   2467  CD2 TYR A 316      88.266  12.059  41.647  1.00 51.60           C
ATOM   2468  CE1 TYR A 316      86.938   9.649  41.409  1.00 54.61           C
ATOM   2469  CE2 TYR A 316      86.891  12.042  41.441  1.00 52.51           C
ATOM   2470  CZ  TYR A 316      86.236  10.834  41.325  1.00 52.84           C
ATOM   2471  OH  TYR A 316      84.877  10.795  41.116  1.00 52.09           O
ATOM   2472  O   THR A 317      92.477  14.607  37.404  1.00 48.53           O
ATOM   2473  N   THR A 317      92.201  12.897  40.439  1.00 45.99           N
ATOM   2474  CA  THR A 317      92.419  14.187  39.772  1.00 47.64           C
ATOM   2475  C   THR A 317      92.989  14.025  38.365  1.00 49.82           C
ATOM   2476  CB  THR A 317      93.377  15.098  40.570  1.00 47.04           C
ATOM   2477  OG1 THR A 317      92.942  15.201  41.936  1.00 44.96           O
ATOM   2478  CG2 THR A 317      93.439  16.487  39.939  1.00 45.04           C
ATOM   2479  O   ASP A 318      93.692  12.733  34.797  1.00 47.62           O
ATOM   2480  N   ASP A 318      94.044  13.221  38.247  1.00 52.78           N
ATOM   2481  CA  ASP A 318      94.703  13.028  36.966  1.00 49.47           C
ATOM   2482  C   ASP A 318      93.788  12.333  35.968  1.00 48.71           C
ATOM   2483  CB  ASP A 318      95.994  12.230  37.154  1.00 61.42           C
ATOM   2484  CG  ASP A 318      97.064  12.636  36.169  1.00 66.29           C
ATOM   2485  OD1 ASP A 318      97.072  12.099  35.036  1.00 65.74           O
ATOM   2486  OD2 ASP A 318      97.864  13.531  36.520  1.00 72.08           O
ATOM   2487  O   ALA A 319      90.724  11.617  33.915  1.00 47.53           O
ATOM   2488  N   ALA A 319      93.106  11.298  36.439  1.00 44.75           N
ATOM   2489  CA  ALA A 319      92.118  10.623  35.620  1.00 47.78           C
ATOM   2490  C   ALA A 319      91.087  11.631  35.099  1.00 47.18           C
ATOM   2491  CB  ALA A 319      91.448   9.510  36.412  1.00 49.05           C
ATOM   2492  O   ILE A 320      89.613  14.720  33.452  1.00 43.08           O
ATOM   2493  N   ILE A 320      90.638  12.528  35.970  1.00 43.85           N
ATOM   2494  CA  ILE A 320      89.674  13.540  35.543  1.00 45.51           C
ATOM   2495  C   ILE A 320      90.275  14.431  34.453  1.00 45.37           C
ATOM   2496  CB  ILE A 320      89.182  14.400  36.735  1.00 46.84           C
ATOM   2497  CG1 ILE A 320      88.335  13.545  37.691  1.00 44.31           C
ATOM   2498  CG2 ILE A 320      88.395  15.624  36.251  1.00 41.48           C
ATOM   2499  CD1 ILE A 320      87.019  13.090  37.100  1.00 43.66           C
ATOM   2500  O   GLN A 321      92.062  15.518  31.188  1.00 50.35           O
ATOM   2501  N   GLN A 321      91.536  14.840  34.619  1.00 45.13           N
ATOM   2502  CA  GLN A 321      92.182  15.655  33.587  1.00 42.37           C
ATOM   2503  C   GLN A 321      92.266  14.914  32.242  1.00 48.29           C
ATOM   2504  CB  GLN A 321      93.572  16.111  34.036  1.00 43.89           C
ATOM   2505  CG  GLN A 321      93.610  16.794  35.409  1.00 41.70           C
ATOM   2506  CD  GLN A 321      92.513  17.840  35.589  1.00 47.83           C
ATOM   2507  OE1 GLN A 321      92.430  18.808  34.832  1.00 45.17           O
ATOM   2508  NE2 GLN A 321      91.650  17.630  36.583  1.00 41.14           N
ATOM   2509  O   ARG A 322      91.183  12.337  29.195  1.00 53.61           O
ATOM   2510  N   ARG A 322      92.515  13.602  32.274  1.00 50.46           N
ATOM   2511  CA  ARG A 322      92.654  12.833  31.035  1.00 51.26           C
ATOM   2512  C   ARG A 322      91.309  12.435  30.423  1.00 54.11           C
ATOM   2513  CB  ARG A 322      93.523  11.596  31.279  1.00 59.29           C
ATOM   2514  CG  ARG A 322      94.954  11.956  31.633  1.00 56.29           C
ATOM   2515  CD  ARG A 322      95.851  10.748  31.820  1.00 65.90           C
ATOM   2516  NE  ARG A 322      97.198  11.155  32.231  1.00 73.61           N
ATOM   2517  CZ  ARG A 322      98.153  11.562  31.396  1.00 75.39           C
ATOM   2518  NH1 ARG A 322      97.922  11.623  30.087  1.00 75.35           N
ATOM   2519  NH2 ARG A 322      99.344  11.911  31.870  1.00 70.31           N
ATOM   2520  O   TRP A 323      88.430  11.280  28.600  1.00 49.65           O
ATOM   2521  N   TRP A 323      90.312  12.210  31.274  1.00 51.04           N
ATOM   2522  CA  TRP A 323      88.937  12.056  30.817  1.00 50.39           C
ATOM   2523  C   TRP A 323      88.808  10.994  29.736  1.00 51.44           C
ATOM   2524  CB  TRP A 323      88.402  13.390  30.302  1.00 47.43           C
ATOM   2525  CG  TRP A 323      86.903  13.469  30.288  1.00 50.45           C
ATOM   2526  CD1 TRP A 323      86.065  13.064  29.287  1.00 50.08           C
ATOM   2527  CD2 TRP A 323      86.063  13.985  31.331  1.00 46.23           C
ATOM   2528  NE1 TRP A 323      84.758  13.291  29.644  1.00 47.78           N
ATOM   2529  CE2 TRP A 323      84.730  13.854  30.894  1.00 48.50           C
ATOM   2530  CE3 TRP A 323      86.309  14.537  32.591  1.00 42.80           C
ATOM   2531  CZ2 TRP A 323      83.646  14.271  31.670  1.00 48.10           C
ATOM   2532  CZ3 TRP A 323      85.231  14.945  33.361  1.00 45.90           C
ATOM   2533  CH2 TRP A 323      83.921  14.814  32.898  1.00 41.48           C
ATOM   2534  O   ASP A 324      89.204   7.186  31.017  1.00 54.95           O
ATOM   2535  N   ASP A 324      89.143   9.766  30.094  1.00 54.45           N
ATOM   2536  CA  ASP A 324      89.114   8.661  29.147  1.00 58.22           C
ATOM   2537  C   ASP A 324      88.697   7.431  29.922  1.00 54.46           C
ATOM   2538  CB  ASP A 324      90.487   8.461  28.471  1.00 62.43           C
ATOM   2539  CG  ASP A 324      90.411   7.574  27.224  1.00 66.78           C
ATOM   2540  OD1 ASP A 324      89.855   6.456  27.303  1.00 69.16           O
ATOM   2541  OD2 ASP A 324      90.898   7.998  26.155  1.00 63.19           O
ATOM   2542  N   ILE A 325      87.758   6.671  29.372  1.00 57.58           N
ATOM   2543  CA  ILE A 325      87.272   5.482  30.062  1.00 64.01           C
ATOM   2544  C   ILE A 325      88.415   4.476  30.246  1.00 65.77           C
ATOM   2545  O   ILE A 325      88.392   3.657  31.163  1.00 69.40           O
ATOM   2546  CB  ILE A 325      86.079   4.839  29.313  1.00 61.77           C
ATOM   2547  CG1 ILE A 325      85.428   3.767  30.183  1.00 67.25           C
ATOM   2548  CG2 ILE A 325      86.497   4.302  27.949  1.00 59.40           C
ATOM   2549  CD1 ILE A 325      85.004   4.280  31.547  1.00 69.26           C
ATOM   2550  N   ASN A 326      89.437   4.588  29.400  1.00 65.40           N
ATOM   2551  CA  ASN A 326      90.640   3.762  29.498  1.00 71.45           C
ATOM   2552  C   ASN A 326      91.385   3.930  30.827  1.00 69.47           C
ATOM   2553  O   ASN A 326      92.085   3.022  31.285  1.00 69.72           O
ATOM   2554  CB  ASN A 326      91.582   4.085  28.337  1.00 67.05           C
ATOM   2555  CG  ASN A 326      92.190   2.848  27.720  1.00 71.26           C
ATOM   2556  OD1 ASN A 326      91.628   1.757  27.806  1.00 75.54           O
ATOM   2557  ND2 ASN A 326      93.350   3.009  27.094  1.00 75.81           N
ATOM   2558  N   GLU A 327      91.217   5.093  31.444  1.00 64.86           N
ATOM   2559  CA  GLU A 327      91.910   5.432  32.681  1.00 65.25           C
ATOM   2560  C   GLU A 327      91.270   4.785  33.899  1.00 65.49           C
ATOM   2561  O   GLU A 327      91.823   4.823  34.997  1.00 62.08           O
ATOM   2562  CB  GLU A 327      91.933   6.952  32.865  1.00 63.24           C
ATOM   2563  CG  GLU A 327      92.460   7.700  31.663  1.00 62.26           C
ATOM   2564  CD  GLU A 327      93.961   7.558  31.526  1.00 67.04           C
ATOM   2565  OE1 GLU A 327      94.658   7.601  32.566  1.00 65.93           O
ATOM   2566  OE2 GLU A 327      94.436   7.392  30.382  1.00 67.29           O
ATOM   2567  N   ILE A 328      90.097   4.192  33.700  1.00 67.36           N
ATOM   2568  CA  ILE A 328      89.294   3.719  34.818  1.00 69.25           C
ATOM   2569  C   ILE A 328      90.015   2.658  35.651  1.00 72.85           C
ATOM   2570  O   ILE A 328      89.643   2.422  36.796  1.00 73.73           O
ATOM   2571  CB  ILE A 328      87.937   3.163  34.331  1.00 70.05           C
ATOM   2572  CG1 ILE A 328      86.933   3.111  35.482  1.00 71.94           C
ATOM   2573  CG2 ILE A 328      88.103   1.796  33.700  1.00 71.00           C
ATOM   2574  CD1 ILE A 328      85.492   3.026  35.030  1.00 69.35           C
ATOM   2575  N   ASP A 329      91.065   2.053  35.092  1.00 76.02           N
ATOM   2576  CA  ASP A 329      91.781   0.955  35.752  1.00 76.40           C
ATOM   2577  C   ASP A 329      92.783   1.393  36.817  1.00 74.61           C
ATOM   2578  O   ASP A 329      93.177   0.586  37.660  1.00 71.66           O
ATOM   2579  CB  ASP A 329      92.502   0.108  34.712  1.00 73.47           C
ATOM   2580  CG  ASP A 329      91.558  -0.766  33.935  1.00 82.64           C
ATOM   2581  OD1 ASP A 329      90.609  -1.299  34.549  1.00 79.64           O
ATOM   2582  OD2 ASP A 329      91.752  -0.906  32.710  1.00 90.02           O
ATOM   2583  N   ARG A 330      93.174   2.667  36.791  1.00 72.80           N
ATOM   2584  CA  ARG A 330      94.180   3.193  37.715  1.00 70.50           C
ATOM   2585  C   ARG A 330      93.618   3.546  39.095  1.00 67.92           C
ATOM   2586  O   ARG A 330      94.374   3.795  40.034  1.00 61.56           O
ATOM   2587  CB  ARG A 330      94.849   4.433  37.108  1.00 72.68           C
ATOM   2588  CG  ARG A 330      96.005   4.131  36.166  1.00 76.43           C
ATOM   2589  CD  ARG A 330      96.930   5.334  35.987  1.00 82.87           C
ATOM   2590  NE  ARG A 330      97.091   6.126  37.209  1.00 86.71           N
ATOM   2591  CZ  ARG A 330      96.568   7.336  37.405  1.00 83.44           C
ATOM   2592  NH1 ARG A 330      95.830   7.918  36.462  1.00 81.65           N
ATOM   2593  NH2 ARG A 330      96.782   7.965  38.552  1.00 78.19           N
ATOM   2594  N   LEU A 331      92.293   3.565  39.212  1.00 69.40           N
ATOM   2595  CA  LEU A 331      91.620   4.036  40.427  1.00 66.81           C
ATOM   2596  C   LEU A 331      91.188   2.870  41.305  1.00 63.20           C
ATOM   2597  O   LEU A 331      90.873   1.806  40.787  1.00 62.10           O
ATOM   2598  CB  LEU A 331      90.396   4.872  40.049  1.00 63.68           C
ATOM   2599  CG  LEU A 331      90.664   6.044  39.108  1.00 60.23           C
ATOM   2600  CD1 LEU A 331      89.382   6.508  38.449  1.00 59.63           C
ATOM   2601  CD2 LEU A 331      91.289   7.156  39.899  1.00 58.84           C
ATOM   2602  O   PRO A 332      88.484   2.660  42.523  1.00 63.37           O
ATOM   2603  N   PRO A 332      91.146   3.072  42.633  1.00 60.42           N
ATOM   2604  CA  PRO A 332      90.568   2.041  43.506  1.00 58.67           C
ATOM   2605  C   PRO A 332      89.104   1.797  43.152  1.00 64.84           C
ATOM   2606  CB  PRO A 332      90.711   2.634  44.909  1.00 60.44           C
ATOM   2607  CG  PRO A 332      90.856   4.109  44.692  1.00 62.91           C
ATOM   2608  CD  PRO A 332      91.558   4.271  43.382  1.00 61.85           C
ATOM   2609  N   ASP A 333      88.564   0.647  43.549  1.00 65.26           N
ATOM   2610  CA  ASP A 333      87.260   0.195  43.057  1.00 65.58           C
ATOM   2611  C   ASP A 333      86.153   1.231  43.242  1.00 65.51           C
ATOM   2612  O   ASP A 333      85.384   1.498  42.313  1.00 62.87           O
ATOM   2613  CB  ASP A 333      86.851  -1.120  43.738  1.00 70.95           C
ATOM   2614  CG  ASP A 333      87.660  -2.313  43.247  1.00 71.30           C
ATOM   2615  OD1 ASP A 333      87.453  -2.745  42.090  1.00 64.46           O
ATOM   2616  OD2 ASP A 333      88.499  -2.819  44.023  1.00 73.28           O
ATOM   2617  N   TYR A 334      86.085   1.818  44.433  1.00 61.56           N
ATOM   2618  CA  TYR A 334      85.015   2.743  44.755  1.00 60.76           C
ATOM   2619  C   TYR A 334      85.092   4.019  43.906  1.00 61.49           C
ATOM   2620  O   TYR A 334      84.073   4.656  43.641  1.00 58.81           O
ATOM   2621  CB  TYR A 334      85.042   3.084  46.246  1.00 62.70           C
ATOM   2622  CG  TYR A 334      86.082   4.111  46.633  1.00 63.83           C
ATOM   2623  CD1 TYR A 334      85.725   5.433  46.867  1.00 63.79           C
ATOM   2624  CD2 TYR A 334      87.415   3.761  46.769  1.00 63.26           C
ATOM   2625  CE1 TYR A 334      86.675   6.382  47.226  1.00 64.50           C
ATOM   2626  CE2 TYR A 334      88.371   4.700  47.130  1.00 66.77           C
ATOM   2627  CZ  TYR A 334      87.997   6.009  47.356  1.00 66.29           C
ATOM   2628  OH  TYR A 334      88.946   6.941  47.714  1.00 63.49           O
ATOM   2629  N   MET A 335      86.292   4.385  43.466  1.00 60.03           N
ATOM   2630  CA  MET A 335      86.439   5.577  42.640  1.00 57.26           C
ATOM   2631  C   MET A 335      86.061   5.305  41.188  1.00 55.43           C
ATOM   2632  O   MET A 335      85.644   6.222  40.473  1.00 55.65           O
ATOM   2633  CB  MET A 335      87.861   6.127  42.716  1.00 55.29           C
ATOM   2634  CG  MET A 335      88.207   6.797  44.039  1.00 55.16           C
ATOM   2635  SD  MET A 335      89.838   7.568  43.950  1.00 56.12           S
ATOM   2636  CE  MET A 335      89.787   8.725  45.315  1.00 52.61           C
ATOM   2637  N   LYS A 336      86.192   4.056  40.749  1.00 55.65           N
ATOM   2638  CA  LYS A 336      85.730   3.700  39.407  1.00 60.97           C
ATOM   2639  C   LYS A 336      84.221   3.860  39.294  1.00 55.51           C
ATOM   2640  O   LYS A 336      83.697   4.096  38.200  1.00 54.41           O
ATOM   2641  CB  LYS A 336      86.111   2.268  39.025  1.00 62.30           C
ATOM   2642  CG  LYS A 336      87.295   1.680  39.750  1.00 64.61           C
ATOM   2643  CD  LYS A 336      87.817   0.480  38.973  1.00 72.97           C
ATOM   2644  CE  LYS A 336      88.802  -0.346  39.779  1.00 80.98           C
ATOM   2645  NZ  LYS A 336      89.652  -1.155  38.875  1.00 88.73           N
ATOM   2646  N   ILE A 337      83.526   3.728  40.419  1.00 49.43           N
ATOM   2647  CA  ILE A 337      82.072   3.859  40.414  1.00 57.79           C
ATOM   2648  C   ILE A 337      81.680   5.273  39.967  1.00 54.78           C
ATOM   2649  O   ILE A 337      80.991   5.445  38.957  1.00 50.90           O
ATOM   2650  CB  ILE A 337      81.457   3.553  41.798  1.00 59.54           C
ATOM   2651  CG1 ILE A 337      81.853   2.146  42.267  1.00 57.57           C
ATOM   2652  CG2 ILE A 337      79.942   3.681  41.745  1.00 54.46           C
ATOM   2653  CD1 ILE A 337      81.310   1.785  43.640  1.00 58.48           C
ATOM   2654  N   SER A 338      82.154   6.279  40.696  1.00 51.45           N
ATOM   2655  CA  SER A 338      81.839   7.664  40.360  1.00 49.59           C
ATOM   2656  C   SER A 338      82.422   8.068  39.008  1.00 49.38           C
ATOM   2657  O   SER A 338      81.730   8.702  38.206  1.00 44.54           O
ATOM   2658  CB  SER A 338      82.343   8.608  41.448  1.00 45.08           C
ATOM   2659  OG  SER A 338      83.743   8.494  41.597  1.00 52.21           O
ATOM   2660  N   TYR A 339      83.679   7.683  38.753  1.00 51.69           N
ATOM   2661  CA  TYR A 339      84.397   8.103  37.544  1.00 46.97           C
ATOM   2662  C   TYR A 339      83.657   7.704  36.273  1.00 48.01           C
ATOM   2663  O   TYR A 339      83.517   8.509  35.347  1.00 50.30           O
ATOM   2664  CB  TYR A 339      85.823   7.529  37.510  1.00 52.41           C
ATOM   2665  CG  TYR A 339      86.660   8.098  36.372  1.00 55.88           C
ATOM   2666  CD1 TYR A 339      87.367   9.294  36.525  1.00 54.25           C
ATOM   2667  CD2 TYR A 339      86.725   7.457  35.136  1.00 55.56           C
ATOM   2668  CE1 TYR A 339      88.128   9.822  35.476  1.00 52.34           C
ATOM   2669  CE2 TYR A 339      87.478   7.979  34.085  1.00 53.42           C
ATOM   2670  CZ  TYR A 339      88.178   9.158  34.258  1.00 52.36           C
ATOM   2671  OH  TYR A 339      88.923   9.677  33.210  1.00 48.12           O
ATOM   2672  N   LYS A 340      83.177   6.464  36.224  1.00 52.19           N
ATOM   2673  CA  LYS A 340      82.396   6.018  35.079  1.00 50.33           C
ATOM   2674  C   LYS A 340      81.049   6.738  35.040  1.00 49.02           C
ATOM   2675  O   LYS A 340      80.574   7.132  33.967  1.00 50.65           O
ATOM   2676  CB  LYS A 340      82.186   4.501  35.105  1.00 54.82           C
ATOM   2677  CG  LYS A 340      81.307   4.001  33.955  1.00 56.96           C
ATOM   2678  CD  LYS A 340      81.243   2.479  33.867  1.00 62.38           C
ATOM   2679  CE  LYS A 340      80.037   2.026  33.044  1.00 64.91           C
ATOM   2680  NZ  LYS A 340      79.965   2.719  31.726  1.00 68.54           N
ATOM   2681  N   ALA A 341      80.432   6.908  36.205  1.00 43.24           N
ATOM   2682  CA  ALA A 341      79.163   7.636  36.272  1.00 50.58           C
ATOM   2683  C   ALA A 341      79.322   9.055  35.704  1.00 46.91           C
ATOM   2684  O   ALA A 341      78.479   9.528  34.931  1.00 43.20           O
ATOM   2685  CB  ALA A 341      78.650   7.686  37.701  1.00 44.16           C
ATOM   2686  N   ILE A 342      80.420   9.716  36.078  1.00 45.29           N
ATOM   2687  CA  ILE A 342      80.705  11.058  35.592  1.00 40.92           C
ATOM   2688  C   ILE A 342      80.828  11.044  34.078  1.00 46.03           C
ATOM   2689  O   ILE A 342      80.201  11.851  33.385  1.00 43.79           O
ATOM   2690  CB  ILE A 342      81.998  11.624  36.213  1.00 46.97           C
ATOM   2691  CG1 ILE A 342      81.798  11.896  37.702  1.00 44.26           C
ATOM   2692  CG2 ILE A 342      82.442  12.898  35.497  1.00 39.89           C
ATOM   2693  CD1 ILE A 342      83.069  12.221  38.437  1.00 44.65           C
ATOM   2694  N   LEU A 343      81.628  10.112  33.564  1.00 47.43           N
ATOM   2695  CA  LEU A 343      81.862  10.034  32.127  1.00 47.80           C
ATOM   2696  C   LEU A 343      80.579   9.713  31.368  1.00 45.61           C
ATOM   2697  O   LEU A 343      80.325  10.277  30.297  1.00 48.34           O
ATOM   2698  CB  LEU A 343      82.947   8.999  31.819  1.00 49.40           C
ATOM   2699  CG  LEU A 343      84.311   9.558  31.394  1.00 50.43           C
ATOM   2700  CD1 LEU A 343      84.826  10.567  32.403  1.00 45.92           C
ATOM   2701  CD2 LEU A 343      85.337   8.427  31.193  1.00 50.86           C
ATOM   2702  N   ASP A 344      79.766   8.820  31.924  1.00 43.95           N
ATOM   2703  CA  ASP A 344      78.470   8.502  31.323  1.00 49.28           C
ATOM   2704  C   ASP A 344      77.538   9.708  31.287  1.00 47.49           C
ATOM   2705  O   ASP A 344      76.880   9.962  30.266  1.00 47.78           O
ATOM   2706  CB  ASP A 344      77.782   7.360  32.077  1.00 49.36           C
ATOM   2707  CG  ASP A 344      78.427   6.015  31.810  1.00 56.72           C
ATOM   2708  OD1 ASP A 344      79.218   5.923  30.847  1.00 55.04           O
ATOM   2709  OD2 ASP A 344      78.141   5.055  32.557  1.00 57.48           O
ATOM   2710  N   LEU A 345      77.474  10.440  32.400  1.00 44.18           N
ATOM   2711  CA  LEU A 345      76.541  11.569  32.510  1.00 46.34           C
ATOM   2712  C   LEU A 345      76.751  12.525  31.346  1.00 44.67           C
ATOM   2713  O   LEU A 345      75.780  13.021  30.764  1.00 45.77           O
ATOM   2714  CB  LEU A 345      76.702  12.306  33.854  1.00 43.38           C
ATOM   2715  CG  LEU A 345      75.886  13.597  34.079  1.00 45.05           C
ATOM   2716  CD1 LEU A 345      74.383  13.356  33.976  1.00 39.27           C
ATOM   2717  CD2 LEU A 345      76.225  14.261  35.417  1.00 39.94           C
ATOM   2718  N   TYR A 346      78.018  12.737  30.979  1.00 45.87           N
ATOM   2719  CA  TYR A 346      78.367  13.713  29.950  1.00 42.20           C
ATOM   2720  C   TYR A 346      78.145  13.187  28.535  1.00 47.65           C
ATOM   2721  O   TYR A 346      77.745  13.948  27.653  1.00 49.54           O
ATOM   2722  CB  TYR A 346      79.811  14.195  30.148  1.00 42.37           C
ATOM   2723  CG  TYR A 346      79.880  15.282  31.204  1.00 39.82           C
ATOM   2724  CD1 TYR A 346      79.470  16.578  30.912  1.00 39.04           C
ATOM   2725  CD2 TYR A 346      80.299  15.006  32.498  1.00 37.71           C
ATOM   2726  CE1 TYR A 346      79.498  17.578  31.871  1.00 38.38           C
ATOM   2727  CE2 TYR A 346      80.329  16.000  33.465  1.00 39.68           C
ATOM   2728  CZ  TYR A 346      79.927  17.283  33.141  1.00 37.58           C
ATOM   2729  OH  TYR A 346      79.955  18.276  34.085  1.00 35.03           O
ATOM   2730  N   LYS A 347      78.364  11.892  28.316  1.00 50.31           N
ATOM   2731  CA  LYS A 347      77.941  11.283  27.053  1.00 53.64           C
ATOM   2732  C   LYS A 347      76.411  11.337  26.929  1.00 52.00           C
ATOM   2733  O   LYS A 347      75.887  11.574  25.839  1.00 55.63           O
ATOM   2734  CB  LYS A 347      78.449   9.841  26.924  1.00 54.53           C
ATOM   2735  CG  LYS A 347      79.654   9.684  25.963  1.00 60.68           C
ATOM   2736  CD  LYS A 347      79.289  10.074  24.514  1.00 67.68           C
ATOM   2737  CE  LYS A 347      80.515  10.162  23.580  1.00 69.70           C
ATOM   2738  NZ  LYS A 347      81.700  10.848  24.175  1.00 66.98           N
ATOM   2739  N   ASP A 348      75.700  11.148  28.042  1.00 50.42           N
ATOM   2740  CA  ASP A 348      74.240  11.368  28.066  1.00 54.46           C
ATOM   2741  C   ASP A 348      73.854  12.785  27.631  1.00 53.07           C
ATOM   2742  O   ASP A 348      72.954  12.963  26.809  1.00 52.29           O
ATOM   2743  CB  ASP A 348      73.663  11.113  29.461  1.00 52.48           C
ATOM   2744  CG  ASP A 348      73.431   9.640  29.745  1.00 60.12           C
ATOM   2745  OD1 ASP A 348      73.231   8.857  28.785  1.00 59.70           O
ATOM   2746  OD2 ASP A 348      73.434   9.271  30.943  1.00 60.80           O
ATOM   2747  N   TYR A 349      74.527  13.788  28.198  1.00 52.12           N
ATOM   2748  CA  TYR A 349      74.281  15.190  27.833  1.00 49.65           C
ATOM   2749  C   TYR A 349      74.470  15.401  26.334  1.00 50.55           C
ATOM   2750  O   TYR A 349      73.652  16.043  25.668  1.00 47.01           O
ATOM   2751  CB  TYR A 349      75.221  16.131  28.588  1.00 45.92           C
ATOM   2752  CG  TYR A 349      74.962  16.314  30.069  1.00 45.16           C
ATOM   2753  CD1 TYR A 349      73.712  16.054  30.630  1.00 45.34           C
ATOM   2754  CD2 TYR A 349      75.974  16.774  30.905  1.00 39.96           C
ATOM   2755  CE1 TYR A 349      73.487  16.242  31.988  1.00 41.21           C
ATOM   2756  CE2 TYR A 349      75.763  16.959  32.253  1.00 39.98           C
ATOM   2757  CZ  TYR A 349      74.517  16.699  32.791  1.00 40.76           C
ATOM   2758  OH  TYR A 349      74.327  16.886  34.143  1.00 41.06           O
ATOM   2759  N   GLU A 350      75.564  14.845  25.818  1.00 56.15           N
ATOM   2760  CA  GLU A 350      75.908  14.961  24.405  1.00 55.71           C
ATOM   2761  C   GLU A 350      74.809  14.382  23.527  1.00 55.19           C
ATOM   2762  O   GLU A 350      74.470  14.959  22.489  1.00 56.23           O
ATOM   2763  CB  GLU A 350      77.240  14.268  24.119  1.00 57.29           C
ATOM   2764  CG  GLU A 350      78.439  14.959  24.752  1.00 58.37           C
ATOM   2765  CD  GLU A 350      79.744  14.277  24.411  1.00 67.11           C
ATOM   2766  OE1 GLU A 350      79.944  13.968  23.215  1.00 71.24           O
ATOM   2767  OE2 GLU A 350      80.563  14.045  25.333  1.00 67.75           O
ATOM   2768  N   LYS A 351      74.239  13.258  23.956  1.00 51.34           N
ATOM   2769  CA  LYS A 351      73.122  12.651  23.231  1.00 58.21           C
ATOM   2770  C   LYS A 351      71.832  13.471  23.374  1.00 55.56           C
ATOM   2771  O   LYS A 351      71.137  13.705  22.385  1.00 57.64           O
ATOM   2772  CB  LYS A 351      72.901  11.208  23.700  1.00 56.34           C
ATOM   2773  CG  LYS A 351      74.054  10.289  23.335  1.00 62.96           C
ATOM   2774  CD  LYS A 351      73.870   8.874  23.869  1.00 70.89           C
ATOM   2775  CE  LYS A 351      75.042   7.984  23.469  1.00 67.53           C
ATOM   2776  NZ  LYS A 351      74.918   6.602  24.021  1.00 72.47           N
ATOM   2777  N   GLU A 352      71.524  13.913  24.595  1.00 54.33           N
ATOM   2778  CA  GLU A 352      70.391  14.818  24.849  1.00 52.38           C
ATOM   2779  C   GLU A 352      70.356  16.040  23.928  1.00 51.72           C
ATOM   2780  O   GLU A 352      69.290  16.512  23.531  1.00 54.89           O
ATOM   2781  CB  GLU A 352      70.428  15.331  26.285  1.00 54.20           C
ATOM   2782  CG  GLU A 352      69.923  14.401  27.357  1.00 53.52           C
ATOM   2783  CD  GLU A 352      69.627  15.162  28.650  1.00 58.03           C
ATOM   2784  OE1 GLU A 352      70.351  14.942  29.647  1.00 53.82           O
ATOM   2785  OE2 GLU A 352      68.677  15.988  28.660  1.00 51.13           O
ATOM   2786  N   LEU A 353      71.532  16.562  23.611  1.00 52.14           N
ATOM   2787  CA  LEU A 353      71.643  17.813  22.866  1.00 53.08           C
ATOM   2788  C   LEU A 353      71.837  17.590  21.364  1.00 57.07           C
ATOM   2789  O   LEU A 353      71.942  18.544  20.596  1.00 56.46           O
ATOM   2790  CB  LEU A 353      72.803  18.650  23.428  1.00 50.24           C
ATOM   2791  CG  LEU A 353      72.662  19.047  24.903  1.00 49.38           C
ATOM   2792  CD1 LEU A 353      73.901  19.747  25.424  1.00 52.09           C
ATOM   2793  CD2 LEU A 353      71.434  19.930  25.101  1.00 53.38           C
ATOM   2794  N   SER A 354      71.871  16.329  20.943  1.00 61.70           N
ATOM   2795  CA  SER A 354      72.204  16.008  19.556  1.00 59.35           C
ATOM   2796  C   SER A 354      71.128  16.449  18.570  1.00 63.03           C
ATOM   2797  O   SER A 354      71.443  17.018  17.525  1.00 65.67           O
ATOM   2798  CB  SER A 354      72.469  14.512  19.411  1.00 59.42           C
ATOM   2799  OG  SER A 354      71.359  13.764  19.866  1.00 69.02           O
ATOM   2800  N   SER A 355      69.863  16.211  18.901  1.00 61.52           N
ATOM   2801  CA  SER A 355      68.782  16.532  17.971  1.00 62.91           C
ATOM   2802  C   SER A 355      68.683  18.031  17.692  1.00 68.24           C
ATOM   2803  O   SER A 355      68.094  18.440  16.690  1.00 71.17           O
ATOM   2804  CB  SER A 355      67.444  16.022  18.499  1.00 62.78           C
ATOM   2805  OG  SER A 355      66.932  16.875  19.506  1.00 71.73           O
ATOM   2806  N   ALA A 356      69.252  18.848  18.576  1.00 66.47           N
ATOM   2807  CA  ALA A 356      69.233  20.295  18.389  1.00 64.11           C
ATOM   2808  C   ALA A 356      70.576  20.771  17.854  1.00 62.50           C
ATOM   2809  O   ALA A 356      70.781  21.960  17.626  1.00 64.33           O
ATOM   2810  CB  ALA A 356      68.891  21.005  19.692  1.00 62.71           C
ATOM   2811  N   GLY A 357      71.491  19.829  17.658  1.00 63.98           N
ATOM   2812  CA  GLY A 357      72.812  20.145  17.148  1.00 63.62           C
ATOM   2813  C   GLY A 357      73.608  20.994  18.118  1.00 62.79           C
ATOM   2814  O   GLY A 357      74.379  21.864  17.709  1.00 65.00           O
ATOM   2815  N   ARG A 358      73.431  20.733  19.409  1.00 57.05           N
ATOM   2816  CA  ARG A 358      74.110  21.506  20.435  1.00 57.36           C
ATOM   2817  C   ARG A 358      75.042  20.651  21.290  1.00 54.06           C
ATOM   2818  O   ARG A 358      75.407  21.044  22.394  1.00 53.30           O
ATOM   2819  CB  ARG A 358      73.079  22.225  21.315  1.00 56.01           C
ATOM   2820  CG  ARG A 358      72.268  23.268  20.547  1.00 57.40           C
ATOM   2821  CD  ARG A 358      71.300  24.064  21.423  1.00 58.82           C
ATOM   2822  NE  ARG A 358      71.990  24.926  22.378  1.00 57.99           N
ATOM   2823  CZ  ARG A 358      72.049  24.686  23.684  1.00 55.44           C
ATOM   2824  NH1 ARG A 358      71.441  23.617  24.194  1.00 47.94           N
ATOM   2825  NH2 ARG A 358      72.706  25.521  24.481  1.00 50.69           N
ATOM   2826  N   SER A 359      75.443  19.492  20.775  1.00 57.25           N
ATOM   2827  CA  SER A 359      76.312  18.582  21.527  1.00 53.10           C
ATOM   2828  C   SER A 359      77.707  19.157  21.788  1.00 49.57           C
ATOM   2829  O   SER A 359      78.361  18.802  22.770  1.00 50.80           O
ATOM   2830  CB  SER A 359      76.447  17.250  20.786  1.00 53.33           C
ATOM   2831  OG  SER A 359      75.174  16.673  20.544  1.00 57.69           O
ATOM   2832  N   HIS A 360      78.157  20.045  20.910  1.00 49.86           N
ATOM   2833  CA  HIS A 360      79.521  20.571  20.967  1.00 53.16           C
ATOM   2834  C   HIS A 360      79.791  21.536  22.124  1.00 55.43           C
ATOM   2835  O   HIS A 360      80.934  21.938  22.335  1.00 54.58           O
ATOM   2836  CB  HIS A 360      79.849  21.281  19.657  1.00 54.38           C
ATOM   2837  CG  HIS A 360      78.899  22.385  19.326  1.00 53.81           C
ATOM   2838  ND1 HIS A 360      77.632  22.153  18.838  1.00 59.82           N
ATOM   2839  CD2 HIS A 360      79.022  23.730  19.432  1.00 59.36           C
ATOM   2840  CE1 HIS A 360      77.016  23.308  18.648  1.00 59.19           C
ATOM   2841  NE2 HIS A 360      77.839  24.281  18.998  1.00 59.31           N
ATOM   2842  N   ILE A 361      78.753  21.922  22.863  1.00 51.38           N
ATOM   2843  CA  ILE A 361      78.925  22.861  23.970  1.00 46.00           C
ATOM   2844  C   ILE A 361      79.221  22.161  25.293  1.00 45.93           C
ATOM   2845  O   ILE A 361      79.632  22.798  26.260  1.00 46.85           O
ATOM   2846  CB  ILE A 361      77.680  23.732  24.165  1.00 53.85           C
ATOM   2847  CG1 ILE A 361      76.510  22.866  24.658  1.00 46.88           C
ATOM   2848  CG2 ILE A 361      77.339  24.460  22.882  1.00 51.30           C
ATOM   2849  CD1 ILE A 361      75.249  23.629  24.831  1.00 50.01           C
ATOM   2850  N   VAL A 362      79.011  20.853  25.339  1.00 43.14           N
ATOM   2851  CA  VAL A 362      79.216  20.102  26.569  1.00 43.31           C
ATOM   2852  C   VAL A 362      80.660  20.198  27.069  1.00 44.79           C
ATOM   2853  O   VAL A 362      80.912  20.129  28.275  1.00 45.91           O
ATOM   2854  CB  VAL A 362      78.828  18.615  26.376  1.00 45.29           C
ATOM   2855  CG1 VAL A 362      79.036  17.811  27.658  1.00 45.92           C
ATOM   2856  CG2 VAL A 362      77.390  18.510  25.923  1.00 48.69           C
ATOM   2857  N   CYS A 363      81.609  20.369  26.150  1.00 45.33           N
ATOM   2858  CA  CYS A 363      83.026  20.411  26.524  1.00 45.98           C
ATOM   2859  C   CYS A 363      83.331  21.567  27.494  1.00 45.48           C
ATOM   2860  O   CYS A 363      84.212  21.447  28.358  1.00 41.30           O
ATOM   2861  CB  CYS A 363      83.903  20.519  25.273  1.00 44.68           C
ATOM   2862  SG  CYS A 363      83.506  21.937  24.218  1.00 60.70           S
ATOM   2863  N   HIS A 364      82.589  22.669  27.363  1.00 43.93           N
ATOM   2864  CA  HIS A 364      82.728  23.808  28.284  1.00 40.66           C
ATOM   2865  C   HIS A 364      82.436  23.442  29.742  1.00 39.53           C
ATOM   2866  O   HIS A 364      83.169  23.831  30.645  1.00 40.33           O
ATOM   2867  CB  HIS A 364      81.812  24.941  27.866  1.00 40.31           C
ATOM   2868  CG  HIS A 364      82.136  25.516  26.527  1.00 45.43           C
ATOM   2869  ND1 HIS A 364      83.235  26.319  26.312  1.00 44.21           N
ATOM   2870  CD2 HIS A 364      81.488  25.435  25.341  1.00 49.08           C
ATOM   2871  CE1 HIS A 364      83.256  26.699  25.046  1.00 48.58           C
ATOM   2872  NE2 HIS A 364      82.208  26.177  24.436  1.00 51.70           N
ATOM   2873  N   ALA A 365      81.368  22.688  29.971  1.00 38.61           N
ATOM   2874  CA  ALA A 365      81.068  22.230  31.320  1.00 39.72           C
ATOM   2875  C   ALA A 365      82.124  21.236  31.801  1.00 37.05           C
ATOM   2876  O   ALA A 365      82.475  21.209  32.984  1.00 36.43           O
ATOM   2877  CB  ALA A 365      79.670  21.607  31.375  1.00 34.16           C
ATOM   2878  N   ILE A 366      82.644  20.427  30.883  1.00 39.49           N
ATOM   2879  CA  ILE A 366      83.668  19.443  31.244  1.00 39.11           C
ATOM   2880  C   ILE A 366      84.966  20.124  31.682  1.00 37.87           C
ATOM   2881  O   ILE A 366      85.543  19.766  32.710  1.00 36.24           O
ATOM   2882  CB  ILE A 366      83.940  18.462  30.081  1.00 42.58           C
ATOM   2883  CG1 ILE A 366      82.700  17.592  29.853  1.00 40.85           C
ATOM   2884  CG2 ILE A 366      85.162  17.592  30.379  1.00 38.82           C
ATOM   2885  CD1 ILE A 366      82.846  16.544  28.770  1.00 43.08           C
ATOM   2886  N   GLU A 367      85.405  21.136  30.938  1.00 39.25           N
ATOM   2887  CA  GLU A 367      86.604  21.875  31.343  1.00 39.06           C
ATOM   2888  C   GLU A 367      86.440  22.507  32.730  1.00 40.40           C
ATOM   2889  O   GLU A 367      87.385  22.503  33.527  1.00 38.55           O
ATOM   2890  CB  GLU A 367      86.956  22.948  30.314  1.00 39.83           C
ATOM   2891  CG  GLU A 367      87.449  22.391  28.977  1.00 46.87           C
ATOM   2892  CD  GLU A 367      88.651  21.460  29.122  1.00 49.17           C
ATOM   2893  OE1 GLU A 367      89.686  21.885  29.692  1.00 51.68           O
ATOM   2894  OE2 GLU A 367      88.553  20.297  28.674  1.00 51.72           O
ATOM   2895  N   ARG A 368      85.238  23.018  33.026  1.00 35.19           N
ATOM   2896  CA  ARG A 368      84.977  23.620  34.331  1.00 33.29           C
ATOM   2897  C   ARG A 368      84.980  22.566  35.427  1.00 31.78           C
ATOM   2898  O   ARG A 368      85.416  22.830  36.543  1.00 31.95           O
ATOM   2899  CB  ARG A 368      83.633  24.367  34.339  1.00 34.07           C
ATOM   2900  CG  ARG A 368      83.612  25.656  33.550  1.00 32.83           C
ATOM   2901  CD  ARG A 368      84.595  26.650  34.127  1.00 35.23           C
ATOM   2902  NE  ARG A 368      84.339  28.002  33.643  1.00 32.01           N
ATOM   2903  CZ  ARG A 368      84.952  29.079  34.117  1.00 34.54           C
ATOM   2904  NH1 ARG A 368      85.840  28.945  35.088  1.00 30.06           N
ATOM   2905  NH2 ARG A 368      84.666  30.286  33.634  1.00 35.04           N
ATOM   2906  N   MET A 369      84.469  21.375  35.126  1.00 33.48           N
ATOM   2907  CA  MET A 369      84.560  20.284  36.098  1.00 36.53           C
ATOM   2908  C   MET A 369      86.019  19.901  36.405  1.00 37.36           C
ATOM   2909  O   MET A 369      86.395  19.723  37.578  1.00 38.46           O
ATOM   2910  CB  MET A 369      83.809  19.045  35.622  1.00 31.71           C
ATOM   2911  CG  MET A 369      83.683  18.025  36.736  1.00 35.47           C
ATOM   2912  SD  MET A 369      83.028  16.433  36.238  1.00 42.86           S
ATOM   2913  CE  MET A 369      82.629  15.742  37.848  1.00 41.61           C
ATOM   2914  N   LYS A 370      86.835  19.766  35.360  1.00 36.69           N
ATOM   2915  CA  LYS A 370      88.270  19.476  35.551  1.00 40.01           C
ATOM   2916  C   LYS A 370      88.920  20.524  36.463  1.00 42.71           C
ATOM   2917  O   LYS A 370      89.742  20.181  37.330  1.00 38.19           O
ATOM   2918  CB  LYS A 370      89.013  19.433  34.209  1.00 40.14           C
ATOM   2919  CG  LYS A 370      88.733  18.200  33.348  1.00 41.97           C
ATOM   2920  CD  LYS A 370      89.358  18.362  31.960  1.00 46.37           C
ATOM   2921  CE  LYS A 370      89.139  17.134  31.093  1.00 47.58           C
ATOM   2922  NZ  LYS A 370      89.400  17.429  29.654  1.00 49.11           N
ATOM   2923  N   GLU A 371      88.524  21.793  36.281  1.00 37.58           N
ATOM   2924  CA  GLU A 371      89.031  22.886  37.113  1.00 38.17           C
ATOM   2925  C   GLU A 371      88.637  22.718  38.587  1.00 38.23           C
ATOM   2926  O   GLU A 371      89.454  22.968  39.479  1.00 39.61           O
ATOM   2927  CB  GLU A 371      88.539  24.252  36.595  1.00 33.18           C
ATOM   2928  CG  GLU A 371      88.921  25.411  37.501  1.00 30.94           C
ATOM   2929  CD  GLU A 371      88.432  26.765  36.991  1.00 37.59           C
ATOM   2930  OE1 GLU A 371      87.291  26.867  36.485  1.00 32.80           O
ATOM   2931  OE2 GLU A 371      89.208  27.745  37.090  1.00 46.71           O
ATOM   2932  N   VAL A 372      87.394  22.307  38.841  1.00 35.52           N
ATOM   2933  CA  VAL A 372      86.922  22.097  40.213  1.00 37.38           C
ATOM   2934  C   VAL A 372      87.703  20.966  40.885  1.00 35.87           C
ATOM   2935  O   VAL A 372      88.115  21.070  42.048  1.00 34.38           O
ATOM   2936  CB  VAL A 372      85.401  21.757  40.266  1.00 38.71           C
ATOM   2937  CG1 VAL A 372      84.991  21.385  41.681  1.00 34.89           C
ATOM   2938  CG2 VAL A 372      84.546  22.924  39.739  1.00 31.49           C
ATOM   2939  N   VAL A 373      87.900  19.878  40.151  1.00 33.60           N
ATOM   2940  CA  VAL A 373      88.669  18.753  40.678  1.00 42.53           C
ATOM   2941  C   VAL A 373      90.140  19.111  40.954  1.00 38.46           C
ATOM   2942  O   VAL A 373      90.676  18.733  42.002  1.00 36.10           O
ATOM   2943  CB  VAL A 373      88.610  17.533  39.730  1.00 42.20           C
ATOM   2944  CG1 VAL A 373      89.424  16.400  40.302  1.00 46.05           C
ATOM   2945  CG2 VAL A 373      87.159  17.094  39.527  1.00 37.82           C
ATOM   2946  N   ARG A 374      90.785  19.859  40.055  1.00 37.51           N
ATOM   2947  CA  ARG A 374      92.174  20.279  40.316  1.00 38.72           C
ATOM   2948  C   ARG A 374      92.267  20.978  41.661  1.00 40.54           C
ATOM   2949  O   ARG A 374      93.148  20.672  42.472  1.00 35.40           O
ATOM   2950  CB  ARG A 374      92.708  21.213  39.223  1.00 39.90           C
ATOM   2951  CG  ARG A 374      92.980  20.538  37.884  1.00 43.62           C
ATOM   2952  CD  ARG A 374      93.786  21.446  36.980  1.00 36.75           C
ATOM   2953  NE  ARG A 374      93.063  22.656  36.622  1.00 39.35           N
ATOM   2954  CZ  ARG A 374      92.291  22.775  35.546  1.00 39.17           C
ATOM   2955  NH1 ARG A 374      92.141  21.753  34.717  1.00 38.62           N
ATOM   2956  NH2 ARG A 374      91.676  23.920  35.292  1.00 39.49           N
ATOM   2957  N   ASN A 375      91.326  21.897  41.898  1.00 39.19           N
ATOM   2958  CA  ASN A 375      91.354  22.748  43.077  1.00 32.81           C
ATOM   2959  C   ASN A 375      90.884  22.038  44.358  1.00 35.77           C
ATOM   2960  O   ASN A 375      91.325  22.385  45.455  1.00 36.32           O
ATOM   2961  CB  ASN A 375      90.526  24.004  42.810  1.00 34.76           C
ATOM   2962  CG  ASN A 375      91.145  24.890  41.732  1.00 38.08           C
ATOM   2963  OD1 ASN A 375      91.853  24.405  40.848  1.00 38.95           O
ATOM   2964  ND2 ASN A 375      90.886  26.195  41.808  1.00 35.21           N
ATOM   2965  N   TYR A 376      89.983  21.066  44.230  1.00 36.31           N
ATOM   2966  CA  TYR A 376      89.727  20.130  45.327  1.00 38.71           C
ATOM   2967  C   TYR A 376      91.053  19.527  45.797  1.00 42.02           C
ATOM   2968  O   TYR A 376      91.388  19.542  46.989  1.00 41.00           O
ATOM   2969  CB  TYR A 376      88.789  19.004  44.892  1.00 37.61           C
ATOM   2970  CG  TYR A 376      87.319  19.354  44.889  1.00 42.62           C
ATOM   2971  CD1 TYR A 376      86.848  20.497  45.527  1.00 41.11           C
ATOM   2972  CD2 TYR A 376      86.397  18.528  44.254  1.00 41.93           C
ATOM   2973  CE1 TYR A 376      85.497  20.807  45.533  1.00 42.83           C
ATOM   2974  CE2 TYR A 376      85.052  18.828  44.253  1.00 42.58           C
ATOM   2975  CZ  TYR A 376      84.606  19.967  44.895  1.00 41.93           C
ATOM   2976  OH  TYR A 376      83.263  20.259  44.887  1.00 38.76           O
ATOM   2977  N   ASN A 377      91.809  19.002  44.837  1.00 37.65           N
ATOM   2978  CA  ASN A 377      93.079  18.350  45.142  1.00 40.11           C
ATOM   2979  C   ASN A 377      94.093  19.286  45.785  1.00 38.44           C
ATOM   2980  O   ASN A 377      94.783  18.902  46.731  1.00 38.13           O
ATOM   2981  CB  ASN A 377      93.674  17.732  43.880  1.00 40.95           C
ATOM   2982  CG  ASN A 377      94.663  16.630  44.199  1.00 48.78           C
ATOM   2983  OD1 ASN A 377      94.305  15.627  44.815  1.00 45.87           O
ATOM   2984  ND2 ASN A 377      95.913  16.813  43.788  1.00 44.99           N
ATOM   2985  N   VAL A 378      94.162  20.523  45.297  1.00 37.81           N
ATOM   2986  CA  VAL A 378      95.053  21.516  45.898  1.00 37.39           C
ATOM   2987  C   VAL A 378      94.654  21.740  47.350  1.00 40.32           C
ATOM   2988  O   VAL A 378      95.510  21.871  48.234  1.00 36.86           O
ATOM   2989  CB  VAL A 378      95.019  22.857  45.126  1.00 36.59           C
ATOM   2990  CG1 VAL A 378      95.516  23.990  45.992  1.00 37.89           C
ATOM   2991  CG2 VAL A 378      95.833  22.753  43.850  1.00 33.90           C
ATOM   2992  N   GLU A 379      93.339  21.759  47.576  1.00 38.62           N
ATOM   2993  CA  GLU A 379      92.750  22.033  48.883  1.00 42.21           C
ATOM   2994  C   GLU A 379      93.086  20.900  49.856  1.00 39.61           C
ATOM   2995  O   GLU A 379      93.420  21.141  51.017  1.00 41.55           O
ATOM   2996  CB  GLU A 379      91.227  22.220  48.738  1.00 42.50           C
ATOM   2997  CG  GLU A 379      90.454  22.488  50.022  1.00 44.82           C
ATOM   2998  CD  GLU A 379      88.957  22.201  49.860  1.00 55.38           C
ATOM   2999  OE1 GLU A 379      88.316  22.818  48.979  1.00 48.65           O
ATOM   3000  OE2 GLU A 379      88.424  21.337  50.595  1.00 64.33           O
ATOM   3001  N   SER A 380      92.995  19.669  49.372  1.00 35.66           N
ATOM   3002  CA  SER A 380      93.497  18.505  50.106  1.00 43.79           C
ATOM   3003  C   SER A 380      94.999  18.621  50.466  1.00 43.78           C
ATOM   3004  O   SER A 380      95.385  18.457  51.634  1.00 41.28           O
ATOM   3005  CB  SER A 380      93.263  17.235  49.290  1.00 41.70           C
ATOM   3006  OG  SER A 380      93.853  16.114  49.926  1.00 52.30           O
ATOM   3007  N   THR A 381      95.836  18.907  49.470  1.00 41.03           N
ATOM   3008  CA  THR A 381      97.276  19.112  49.711  1.00 41.09           C
ATOM   3009  C   THR A 381      97.541  20.130  50.823  1.00 42.88           C
ATOM   3010  O   THR A 381      98.395  19.915  51.687  1.00 43.65           O
ATOM   3011  CB  THR A 381      98.002  19.587  48.450  1.00 39.17           C
ATOM   3012  OG1 THR A 381      97.649  18.745  47.345  1.00 39.69           O
ATOM   3013  CG2 THR A 381      99.527  19.548  48.664  1.00 40.74           C
ATOM   3014  N   TRP A 382      96.792  21.227  50.807  1.00 39.60           N
ATOM   3015  CA  TRP A 382      96.935  22.271  51.816  1.00 40.70           C
ATOM   3016  C   TRP A 382      96.570  21.771  53.202  1.00 42.42           C
ATOM   3017  O   TRP A 382      97.245  22.095  54.178  1.00 43.86           O
ATOM   3018  CB  TRP A 382      96.063  23.489  51.478  1.00 40.46           C
ATOM   3019  CG  TRP A 382      96.577  24.327  50.363  1.00 41.65           C
ATOM   3020  CD1 TRP A 382      97.776  24.195  49.720  1.00 43.36           C
ATOM   3021  CD2 TRP A 382      95.913  25.443  49.752  1.00 42.12           C
ATOM   3022  NE1 TRP A 382      97.895  25.159  48.745  1.00 45.09           N
ATOM   3023  CE2 TRP A 382      96.765  25.935  48.745  1.00 40.00           C
ATOM   3024  CE3 TRP A 382      94.674  26.068  49.954  1.00 40.86           C
ATOM   3025  CZ2 TRP A 382      96.424  27.027  47.946  1.00 44.59           C
ATOM   3026  CZ3 TRP A 382      94.337  27.156  49.156  1.00 39.43           C
ATOM   3027  CH2 TRP A 382      95.205  27.621  48.167  1.00 38.47           C
ATOM   3028  N   PHE A 383      95.481  21.006  53.288  1.00 47.55           N
ATOM   3029  CA  PHE A 383      95.033  20.462  54.569  1.00 47.16           C
ATOM   3030  C   PHE A 383      96.066  19.502  55.140  1.00 43.93           C
ATOM   3031  O   PHE A 383      96.397  19.543  56.324  1.00 45.72           O
ATOM   3032  CB  PHE A 383      93.689  19.738  54.428  1.00 48.04           C
ATOM   3033  CG  PHE A 383      93.285  18.988  55.669  1.00 54.88           C
ATOM   3034  CD1 PHE A 383      92.778  19.668  56.768  1.00 60.46           C
ATOM   3035  CD2 PHE A 383      93.444  17.611  55.751  1.00 53.09           C
ATOM   3036  CE1 PHE A 383      92.418  18.990  57.917  1.00 62.91           C
ATOM   3037  CE2 PHE A 383      93.086  16.924  56.901  1.00 54.94           C
ATOM   3038  CZ  PHE A 383      92.571  17.616  57.984  1.00 57.96           C
ATOM   3039  N   ILE A 384      96.563  18.627  54.283  1.00 39.15           N
ATOM   3040  CA  ILE A 384      97.560  17.644  54.679  1.00 44.85           C
ATOM   3041  C   ILE A 384      98.908  18.264  55.098  1.00 48.58           C
ATOM   3042  O   ILE A 384      99.540  17.798  56.043  1.00 48.08           O
ATOM   3043  CB  ILE A 384      97.762  16.646  53.539  1.00 48.74           C
ATOM   3044  CG1 ILE A 384      96.746  15.518  53.693  1.00 49.82           C
ATOM   3045  CG2 ILE A 384      99.167  16.082  53.548  1.00 49.17           C
ATOM   3046  CD1 ILE A 384      96.243  15.009  52.397  1.00 59.13           C
ATOM   3047  N   GLU A 385      99.325  19.334  54.423  1.00 46.96           N
ATOM   3048  CA  GLU A 385     100.583  19.997  54.758  1.00 44.55           C
ATOM   3049  C   GLU A 385     100.422  20.956  55.932  1.00 44.60           C
ATOM   3050  O   GLU A 385     101.406  21.470  56.452  1.00 41.40           O
ATOM   3051  CB  GLU A 385     101.137  20.763  53.547  1.00 42.88           C
ATOM   3052  CG  GLU A 385     101.600  19.865  52.408  1.00 45.86           C
ATOM   3053  CD  GLU A 385     102.102  20.638  51.188  1.00 49.06           C
ATOM   3054  OE1 GLU A 385     101.976  21.889  51.162  1.00 44.60           O
ATOM   3055  OE2 GLU A 385     102.607  19.976  50.243  1.00 46.95           O
ATOM   3056  N   GLY A 386      99.183  21.203  56.344  1.00 40.11           N
ATOM   3057  CA  GLY A 386      98.919  22.209  57.358  1.00 41.12           C
ATOM   3058  C   GLY A 386      99.226  23.622  56.875  1.00 41.93           C
ATOM   3059  O   GLY A 386      99.619  24.492  57.654  1.00 43.91           O
ATOM   3060  N   TYR A 387      99.051  23.857  55.580  1.00 38.68           N
ATOM   3061  CA  TYR A 387      99.350  25.161  54.994  1.00 39.30           C
ATOM   3062  C   TYR A 387      98.212  26.178  55.182  1.00 42.71           C
ATOM   3063  O   TYR A 387      97.044  25.862  54.962  1.00 40.26           O
ATOM   3064  CB  TYR A 387      99.659  24.989  53.502  1.00 38.28           C
ATOM   3065  CG  TYR A 387     100.078  26.256  52.782  1.00 41.59           C
ATOM   3066  CD1 TYR A 387     101.093  27.070  53.289  1.00 39.90           C
ATOM   3067  CD2 TYR A 387      99.485  26.623  51.575  1.00 38.93           C
ATOM   3068  CE1 TYR A 387     101.490  28.220  52.621  1.00 36.50           C
ATOM   3069  CE2 TYR A 387      99.879  27.781  50.900  1.00 38.96           C
ATOM   3070  CZ  TYR A 387     100.889  28.569  51.428  1.00 39.28           C
ATOM   3071  OH  TYR A 387     101.293  29.716  50.768  1.00 38.58           O
ATOM   3072  N   THR A 388      98.562  27.396  55.583  1.00 43.85           N
ATOM   3073  CA  THR A 388      97.602  28.493  55.654  1.00 43.72           C
ATOM   3074  C   THR A 388      98.011  29.624  54.717  1.00 40.08           C
ATOM   3075  O   THR A 388      98.751  30.521  55.099  1.00 44.14           O
ATOM   3076  CB  THR A 388      97.453  29.044  57.092  1.00 46.31           C
ATOM   3077  OG1 THR A 388      97.054  27.986  57.974  1.00 50.76           O
ATOM   3078  CG2 THR A 388      96.391  30.142  57.127  1.00 46.78           C
ATOM   3079  N   PRO A 389      97.512  29.592  53.478  1.00 40.24           N
ATOM   3080  CA  PRO A 389      97.863  30.590  52.461  1.00 39.18           C
ATOM   3081  C   PRO A 389      97.414  32.003  52.829  1.00 40.87           C
ATOM   3082  O   PRO A 389      96.547  32.163  53.695  1.00 40.47           O
ATOM   3083  CB  PRO A 389      97.109  30.097  51.214  1.00 40.07           C
ATOM   3084  CG  PRO A 389      95.981  29.290  51.742  1.00 37.94           C
ATOM   3085  CD  PRO A 389      96.491  28.645  53.002  1.00 38.82           C
ATOM   3086  N   PRO A 390      98.006  33.022  52.185  1.00 39.84           N
ATOM   3087  CA  PRO A 390      97.464  34.383  52.254  1.00 38.88           C
ATOM   3088  C   PRO A 390      96.082  34.437  51.564  1.00 38.59           C
ATOM   3089  O   PRO A 390      95.755  33.526  50.790  1.00 38.15           O
ATOM   3090  CB  PRO A 390      98.499  35.222  51.495  1.00 37.77           C
ATOM   3091  CG  PRO A 390      99.692  34.333  51.319  1.00 38.85           C
ATOM   3092  CD  PRO A 390      99.189  32.938  51.317  1.00 38.02           C
ATOM   3093  N   VAL A 391      95.286  35.468  51.833  1.00 36.77           N
ATOM   3094  CA  VAL A 391      93.923  35.516  51.295  1.00 35.79           C
ATOM   3095  C   VAL A 391      93.919  35.448  49.772  1.00 35.22           C
ATOM   3096  O   VAL A 391      93.159  34.683  49.184  1.00 35.36           O
ATOM   3097  CB  VAL A 391      93.166  36.790  51.728  1.00 38.57           C
ATOM   3098  CG1 VAL A 391      91.817  36.862  51.016  1.00 32.24           C
ATOM   3099  CG2 VAL A 391      92.977  36.817  53.231  1.00 38.36           C
ATOM   3100  N   SER A 392      94.782  36.225  49.128  1.00 32.49           N
ATOM   3101  CA  SER A 392      94.772  36.265  47.672  1.00 33.97           C
ATOM   3102  C   SER A 392      95.060  34.886  47.083  1.00 36.39           C
ATOM   3103  O   SER A 392      94.469  34.502  46.070  1.00 40.42           O
ATOM   3104  CB  SER A 392      95.782  37.290  47.150  1.00 34.62           C
ATOM   3105  OG  SER A 392      97.076  37.019  47.666  1.00 44.79           O
ATOM   3106  N   GLU A 393      95.948  34.134  47.725  1.00 32.31           N
ATOM   3107  CA  GLU A 393      96.272  32.795  47.249  1.00 35.77           C
ATOM   3108  C   GLU A 393      95.150  31.831  47.591  1.00 32.70           C
ATOM   3109  O   GLU A 393      94.793  30.973  46.784  1.00 33.43           O
ATOM   3110  CB  GLU A 393      97.602  32.279  47.840  1.00 32.62           C
ATOM   3111  CG  GLU A 393      97.906  30.823  47.427  1.00 37.64           C
ATOM   3112  CD  GLU A 393      99.204  30.265  48.005  1.00 37.79           C
ATOM   3113  OE1 GLU A 393      99.793  30.901  48.905  1.00 37.18           O
ATOM   3114  OE2 GLU A 393      99.621  29.182  47.556  1.00 35.11           O
ATOM   3115  N   TYR A 394      94.620  31.948  48.802  1.00 33.56           N
ATOM   3116  CA  TYR A 394      93.438  31.174  49.184  1.00 34.99           C
ATOM   3117  C   TYR A 394      92.333  31.301  48.140  1.00 35.27           C
ATOM   3118  O   TYR A 394      91.810  30.302  47.654  1.00 34.92           O
ATOM   3119  CB  TYR A 394      92.906  31.631  50.543  1.00 36.46           C
ATOM   3120  CG  TYR A 394      91.546  31.055  50.864  1.00 40.70           C
ATOM   3121  CD1 TYR A 394      91.410  29.710  51.163  1.00 38.04           C
ATOM   3122  CD2 TYR A 394      90.396  31.857  50.859  1.00 36.18           C
ATOM   3123  CE1 TYR A 394      90.183  29.156  51.442  1.00 38.39           C
ATOM   3124  CE2 TYR A 394      89.156  31.314  51.142  1.00 35.38           C
ATOM   3125  CZ  TYR A 394      89.058  29.957  51.436  1.00 43.83           C
ATOM   3126  OH  TYR A 394      87.844  29.384  51.731  1.00 41.75           O
ATOM   3127  N   LEU A 395      92.004  32.544  47.789  1.00 33.13           N
ATOM   3128  CA  LEU A 395      90.918  32.826  46.861  1.00 34.36           C
ATOM   3129  C   LEU A 395      91.201  32.267  45.481  1.00 35.58           C
ATOM   3130  O   LEU A 395      90.292  31.742  44.836  1.00 36.23           O
ATOM   3131  CB  LEU A 395      90.655  34.339  46.756  1.00 32.21           C
ATOM   3132  CG  LEU A 395      89.917  34.982  47.932  1.00 32.46           C
ATOM   3133  CD1 LEU A 395      89.656  36.472  47.697  1.00 27.04           C
ATOM   3134  CD2 LEU A 395      88.610  34.246  48.195  1.00 32.29           C
ATOM   3135  N   SER A 396      92.450  32.380  45.023  1.00 36.05           N
ATOM   3136  CA  SER A 396      92.811  31.889  43.693  1.00 32.38           C
ATOM   3137  C   SER A 396      92.485  30.402  43.550  1.00 34.42           C
ATOM   3138  O   SER A 396      92.170  29.928  42.449  1.00 37.85           O
ATOM   3139  CB  SER A 396      94.287  32.132  43.407  1.00 36.97           C
ATOM   3140  OG  SER A 396      95.100  31.305  44.230  1.00 38.30           O
ATOM   3141  N   ASN A 397      92.524  29.665  44.658  1.00 32.13           N
ATOM   3142  CA  ASN A 397      92.092  28.261  44.617  1.00 35.37           C
ATOM   3143  C   ASN A 397      90.645  28.005  45.059  1.00 34.74           C
ATOM   3144  O   ASN A 397      89.939  27.200  44.450  1.00 31.37           O
ATOM   3145  CB  ASN A 397      92.998  27.385  45.482  1.00 30.83           C
ATOM   3146  CG  ASN A 397      92.706  25.921  45.294  1.00 35.05           C
ATOM   3147  OD1 ASN A 397      92.881  25.393  44.194  1.00 37.79           O
ATOM   3148  ND2 ASN A 397      92.230  25.255  46.350  1.00 34.47           N
ATOM   3149  N   ALA A 398      90.225  28.657  46.142  1.00 33.15           N
ATOM   3150  CA  ALA A 398      88.951  28.324  46.781  1.00 36.55           C
ATOM   3151  C   ALA A 398      87.718  28.906  46.069  1.00 38.51           C
ATOM   3152  O   ALA A 398      86.587  28.507  46.371  1.00 37.34           O
ATOM   3153  CB  ALA A 398      88.966  28.772  48.232  1.00 35.43           C
ATOM   3154  N   LEU A 399      87.911  29.837  45.139  1.00 33.51           N
ATOM   3155  CA  LEU A 399      86.758  30.358  44.408  1.00 33.87           C
ATOM   3156  C   LEU A 399      86.148  29.262  43.538  1.00 36.70           C
ATOM   3157  O   LEU A 399      84.921  29.085  43.503  1.00 33.59           O
ATOM   3158  CB  LEU A 399      87.140  31.576  43.566  1.00 32.10           C
ATOM   3159  CG  LEU A 399      87.386  32.856  44.394  1.00 33.52           C
ATOM   3160  CD1 LEU A 399      87.946  33.980  43.545  1.00 26.75           C
ATOM   3161  CD2 LEU A 399      86.100  33.313  45.088  1.00 32.27           C
ATOM   3162  N   ALA A 400      86.988  28.492  42.861  1.00 33.89           N
ATOM   3163  CA  ALA A 400      86.454  27.473  41.968  1.00 31.62           C
ATOM   3164  C   ALA A 400      85.844  26.321  42.750  1.00 33.93           C
ATOM   3165  O   ALA A 400      84.909  25.664  42.261  1.00 33.32           O
ATOM   3166  CB  ALA A 400      87.518  26.969  41.025  1.00 34.16           C
ATOM   3167  N   THR A 401      86.333  26.080  43.967  1.00 32.81           N
ATOM   3168  CA  THR A 401      85.816  24.952  44.736  1.00 33.51           C
ATOM   3169  C   THR A 401      84.389  25.221  45.251  1.00 37.12           C
ATOM   3170  O   THR A 401      83.737  24.304  45.764  1.00 36.59           O
ATOM   3171  CB  THR A 401      86.723  24.575  45.926  1.00 31.40           C
ATOM   3172  OG1 THR A 401      86.811  25.668  46.832  1.00 35.94           O
ATOM   3173  CG2 THR A 401      88.132  24.189  45.461  1.00 34.14           C
ATOM   3174  N   THR A 402      83.892  26.453  45.106  1.00 31.53           N
ATOM   3175  CA  THR A 402      82.459  26.704  45.336  1.00 33.26           C
ATOM   3176  C   THR A 402      81.595  25.896  44.377  1.00 32.13           C
ATOM   3177  O   THR A 402      80.431  25.629  44.672  1.00 36.85           O
ATOM   3178  CB  THR A 402      82.062  28.184  45.152  1.00 33.18           C
ATOM   3179  OG1 THR A 402      82.197  28.548  43.770  1.00 31.08           O
ATOM   3180  CG2 THR A 402      82.879  29.104  46.040  1.00 31.82           C
ATOM   3181  N   THR A 403      82.194  25.522  43.241  1.00 31.33           N
ATOM   3182  CA  THR A 403      81.553  24.912  42.062  1.00 31.17           C
ATOM   3183  C   THR A 403      80.746  25.920  41.236  1.00 30.72           C
ATOM   3184  O   THR A 403      80.171  25.560  40.211  1.00 29.20           O
ATOM   3185  CB  THR A 403      80.615  23.718  42.412  1.00 33.98           C
ATOM   3186  OG1 THR A 403      79.415  24.206  43.023  1.00 31.95           O
ATOM   3187  CG2 THR A 403      81.302  22.719  43.345  1.00 31.05           C
ATOM   3188  N   TYR A 404      80.738  27.188  41.637  1.00 29.57           N
ATOM   3189  CA  TYR A 404      79.828  28.122  40.994  1.00 31.78           C
ATOM   3190  C   TYR A 404      80.209  28.489  39.551  1.00 34.03           C
ATOM   3191  O   TYR A 404      79.321  28.804  38.765  1.00 30.36           O
ATOM   3192  CB  TYR A 404      79.666  29.385  41.853  1.00 32.09           C
ATOM   3193  CG  TYR A 404      78.423  29.324  42.718  1.00 33.78           C
ATOM   3194  CD1 TYR A 404      77.886  28.097  43.110  1.00 33.38           C
ATOM   3195  CD2 TYR A 404      77.766  30.478  43.117  1.00 33.21           C
ATOM   3196  CE1 TYR A 404      76.736  28.027  43.890  1.00 32.83           C
ATOM   3197  CE2 TYR A 404      76.614  30.419  43.896  1.00 32.80           C
ATOM   3198  CZ  TYR A 404      76.101  29.197  44.274  1.00 34.66           C
ATOM   3199  OH  TYR A 404      74.953  29.144  45.047  1.00 31.80           O
ATOM   3200  N   TYR A 405      81.491  28.432  39.173  1.00 35.17           N
ATOM   3201  CA  TYR A 405      81.836  28.627  37.747  1.00 34.03           C
ATOM   3202  C   TYR A 405      81.262  27.466  36.939  1.00 32.53           C
ATOM   3203  O   TYR A 405      80.710  27.628  35.846  1.00 32.30           O
ATOM   3204  CB  TYR A 405      83.353  28.691  37.499  1.00 31.27           C
ATOM   3205  CG  TYR A 405      84.116  29.797  38.176  1.00 30.22           C
ATOM   3206  CD1 TYR A 405      84.084  31.098  37.688  1.00 32.49           C
ATOM   3207  CD2 TYR A 405      84.914  29.534  39.283  1.00 32.01           C
ATOM   3208  CE1 TYR A 405      84.799  32.122  38.308  1.00 31.22           C
ATOM   3209  CE2 TYR A 405      85.641  30.553  39.906  1.00 33.51           C
ATOM   3210  CZ  TYR A 405      85.577  31.840  39.412  1.00 31.04           C
ATOM   3211  OH  TYR A 405      86.301  32.846  40.026  1.00 31.11           O
ATOM   3212  N   TYR A 406      81.453  26.280  37.497  1.00 32.70           N
ATOM   3213  CA  TYR A 406      80.940  25.030  36.951  1.00 34.29           C
ATOM   3214  C   TYR A 406      79.392  25.022  36.825  1.00 33.30           C
ATOM   3215  O   TYR A 406      78.839  24.669  35.768  1.00 31.64           O
ATOM   3216  CB  TYR A 406      81.450  23.896  37.852  1.00 30.51           C
ATOM   3217  CG  TYR A 406      81.098  22.481  37.476  1.00 35.00           C
ATOM   3218  CD1 TYR A 406      81.122  22.053  36.156  1.00 33.69           C
ATOM   3219  CD2 TYR A 406      80.794  21.550  38.461  1.00 32.31           C
ATOM   3220  CE1 TYR A 406      80.809  20.742  35.829  1.00 31.38           C
ATOM   3221  CE2 TYR A 406      80.490  20.246  38.143  1.00 35.00           C
ATOM   3222  CZ  TYR A 406      80.500  19.847  36.828  1.00 34.20           C
ATOM   3223  OH  TYR A 406      80.209  18.538  36.524  1.00 35.26           O
ATOM   3224  N   LEU A 407      78.691  25.421  37.881  1.00 29.83           N
ATOM   3225  CA  LEU A 407      77.218  25.349  37.849  1.00 33.10           C
ATOM   3226  C   LEU A 407      76.639  26.337  36.851  1.00 34.55           C
ATOM   3227  O   LEU A 407      75.692  26.013  36.111  1.00 33.20           O
ATOM   3228  CB  LEU A 407      76.614  25.612  39.221  1.00 29.02           C
ATOM   3229  CG  LEU A 407      76.943  24.594  40.306  1.00 29.96           C
ATOM   3230  CD1 LEU A 407      75.981  24.770  41.504  1.00 26.87           C
ATOM   3231  CD2 LEU A 407      76.873  23.212  39.717  1.00 29.59           C
ATOM   3232  N   ALA A 408      77.213  27.538  36.826  1.00 30.83           N
ATOM   3233  CA  ALA A 408      76.770  28.568  35.902  1.00 31.73           C
ATOM   3234  C   ALA A 408      76.913  28.075  34.466  1.00 32.13           C
ATOM   3235  O   ALA A 408      76.016  28.241  33.653  1.00 36.60           O
ATOM   3236  CB  ALA A 408      77.565  29.852  36.113  1.00 28.71           C
ATOM   3237  N   THR A 409      78.041  27.442  34.172  1.00 32.46           N
ATOM   3238  CA  THR A 409      78.304  26.884  32.850  1.00 33.20           C
ATOM   3239  C   THR A 409      77.335  25.755  32.537  1.00 31.45           C
ATOM   3240  O   THR A 409      76.743  25.689  31.454  1.00 30.93           O
ATOM   3241  CB  THR A 409      79.761  26.371  32.779  1.00 34.29           C
ATOM   3242  OG1 THR A 409      80.640  27.450  33.123  1.00 32.62           O
ATOM   3243  CG2 THR A 409      80.100  25.841  31.404  1.00 32.42           C
ATOM   3244  N   THR A 410      77.181  24.866  33.510  1.00 29.94           N
ATOM   3245  CA  THR A 410      76.200  23.801  33.431  1.00 31.63           C
ATOM   3246  C   THR A 410      74.786  24.321  33.177  1.00 34.38           C
ATOM   3247  O   THR A 410      74.044  23.746  32.384  1.00 33.36           O
ATOM   3248  CB  THR A 410      76.216  22.989  34.706  1.00 32.39           C
ATOM   3249  OG1 THR A 410      77.531  22.442  34.882  1.00 32.32           O
ATOM   3250  CG2 THR A 410      75.181  21.866  34.636  1.00 32.58           C
ATOM   3251  N   SER A 411      74.430  25.434  33.815  1.00 33.87           N
ATOM   3252  CA  SER A 411      73.078  25.960  33.694  1.00 32.17           C
ATOM   3253  C   SER A 411      72.734  26.283  32.238  1.00 34.35           C
ATOM   3254  O   SER A 411      71.568  26.182  31.845  1.00 32.89           O
ATOM   3255  CB  SER A 411      72.900  27.194  34.585  1.00 31.91           C
ATOM   3256  OG  SER A 411      73.209  28.385  33.890  1.00 28.84           O
ATOM   3257  N   TYR A 412      73.743  26.626  31.431  1.00 32.43           N
ATOM   3258  CA  TYR A 412      73.512  26.955  30.016  1.00 34.98           C
ATOM   3259  C   TYR A 412      73.244  25.732  29.118  1.00 37.47           C
ATOM   3260  O   TYR A 412      72.708  25.875  28.016  1.00 39.33           O
ATOM   3261  CB  TYR A 412      74.703  27.722  29.427  1.00 35.67           C
ATOM   3262  CG  TYR A 412      74.913  29.153  29.906  1.00 40.60           C
ATOM   3263  CD1 TYR A 412      74.080  29.744  30.845  1.00 37.34           C
ATOM   3264  CD2 TYR A 412      75.962  29.913  29.399  1.00 42.60           C
ATOM   3265  CE1 TYR A 412      74.301  31.050  31.267  1.00 37.65           C
ATOM   3266  CE2 TYR A 412      76.191  31.199  29.818  1.00 35.55           C
ATOM   3267  CZ  TYR A 412      75.365  31.769  30.745  1.00 39.20           C
ATOM   3268  OH  TYR A 412      75.608  33.069  31.141  1.00 37.56           O
ATOM   3269  N   LEU A 413      73.628  24.542  29.576  1.00 32.66           N
ATOM   3270  CA  LEU A 413      73.608  23.357  28.722  1.00 36.18           C
ATOM   3271  C   LEU A 413      72.226  23.106  28.118  1.00 43.15           C
ATOM   3272  O   LEU A 413      72.094  22.894  26.909  1.00 43.49           O
ATOM   3273  CB  LEU A 413      74.058  22.124  29.507  1.00 36.56           C
ATOM   3274  CG  LEU A 413      75.523  22.012  29.962  1.00 36.13           C
ATOM   3275  CD1 LEU A 413      75.735  20.727  30.747  1.00 35.29           C
ATOM   3276  CD2 LEU A 413      76.512  22.094  28.799  1.00 37.04           C
ATOM   3277  N   GLY A 414      71.198  23.160  28.958  1.00 39.80           N
ATOM   3278  CA  GLY A 414      69.856  22.838  28.522  1.00 42.39           C
ATOM   3279  C   GLY A 414      69.104  24.028  27.962  1.00 43.05           C
ATOM   3280  O   GLY A 414      67.936  23.909  27.572  1.00 35.95           O
ATOM   3281  N   MET A 415      69.768  25.180  27.914  1.00 40.64           N
ATOM   3282  CA  MET A 415      69.117  26.376  27.405  1.00 40.10           C
ATOM   3283  C   MET A 415      69.305  26.436  25.893  1.00 47.01           C
ATOM   3284  O   MET A 415      70.400  26.722  25.403  1.00 50.33           O
ATOM   3285  CB  MET A 415      69.664  27.636  28.087  1.00 42.98           C
ATOM   3286  CG  MET A 415      69.500  27.662  29.605  1.00 35.88           C
ATOM   3287  SD  MET A 415      70.183  29.160  30.362  1.00 40.24           S
ATOM   3288  CE  MET A 415      69.130  30.440  29.705  1.00 37.89           C
ATOM   3289  N   LYS A 416      68.227  26.162  25.161  1.00 51.16           N
ATOM   3290  CA  LYS A 416      68.272  26.048  23.703  1.00 51.90           C
ATOM   3291  C   LYS A 416      68.821  27.298  23.007  1.00 51.49           C
ATOM   3292  O   LYS A 416      69.349  27.220  21.901  1.00 57.10           O
ATOM   3293  CB  LYS A 416      66.873  25.730  23.152  1.00 53.17           C
ATOM   3294  CG  LYS A 416      66.871  24.609  22.115  1.00 64.71           C
ATOM   3295  CD  LYS A 416      65.560  24.522  21.337  1.00 67.91           C
ATOM   3296  CE  LYS A 416      65.645  23.446  20.254  1.00 70.59           C
ATOM   3297  NZ  LYS A 416      64.492  23.500  19.308  1.00 80.67           N
ATOM   3298  N   SER A 417      68.713  28.449  23.652  1.00 50.58           N
ATOM   3299  CA  SER A 417      69.108  29.690  23.006  1.00 47.59           C
ATOM   3300  C   SER A 417      70.569  30.039  23.273  1.00 49.01           C
ATOM   3301  O   SER A 417      71.088  31.007  22.718  1.00 53.59           O
ATOM   3302  CB  SER A 417      68.206  30.834  23.468  1.00 50.74           C
ATOM   3303  OG  SER A 417      67.982  30.761  24.863  1.00 51.84           O
ATOM   3304  N   ALA A 418      71.234  29.256  24.115  1.00 48.53           N
ATOM   3305  CA  ALA A 418      72.628  29.534  24.458  1.00 47.55           C
ATOM   3306  C   ALA A 418      73.560  29.073  23.344  1.00 53.24           C
ATOM   3307  O   ALA A 418      73.477  27.931  22.877  1.00 52.29           O
ATOM   3308  CB  ALA A 418      73.006  28.869  25.774  1.00 43.74           C
ATOM   3309  N   THR A 419      74.453  29.970  22.937  1.00 50.14           N
ATOM   3310  CA  THR A 419      75.318  29.753  21.789  1.00 48.55           C
ATOM   3311  C   THR A 419      76.772  29.630  22.220  1.00 54.53           C
ATOM   3312  O   THR A 419      77.091  29.769  23.404  1.00 54.58           O
ATOM   3313  CB  THR A 419      75.186  30.903  20.775  1.00 53.21           C
ATOM   3314  OG1 THR A 419      75.829  32.073  21.292  1.00 48.03           O
ATOM   3315  CG2 THR A 419      73.713  31.216  20.510  1.00 48.08           C
ATOM   3316  N   GLU A 420      77.656  29.373  21.258  1.00 57.40           N
ATOM   3317  CA  GLU A 420      79.083  29.282  21.544  1.00 53.60           C
ATOM   3318  C   GLU A 420      79.627  30.595  22.085  1.00 53.65           C
ATOM   3319  O   GLU A 420      80.426  30.607  23.018  1.00 51.77           O
ATOM   3320  CB  GLU A 420      79.858  28.877  20.295  1.00 60.33           C
ATOM   3321  CG  GLU A 420      80.395  27.464  20.372  1.00 65.93           C
ATOM   3322  CD  GLU A 420      81.432  27.301  21.475  1.00 66.86           C
ATOM   3323  OE1 GLU A 420      82.209  28.258  21.721  1.00 64.26           O
ATOM   3324  OE2 GLU A 420      81.453  26.218  22.103  1.00 67.56           O
ATOM   3325  N   GLN A 421      79.173  31.694  21.490  1.00 52.97           N
ATOM   3326  CA  GLN A 421      79.562  33.034  21.905  1.00 50.98           C
ATOM   3327  C   GLN A 421      79.183  33.311  23.357  1.00 51.01           C
ATOM   3328  O   GLN A 421      79.913  33.989  24.080  1.00 50.32           O
ATOM   3329  CB  GLN A 421      78.919  34.079  20.988  1.00 56.45           C
ATOM   3330  CG  GLN A 421      79.433  34.060  19.549  1.00 61.05           C
ATOM   3331  CD  GLN A 421      78.942  32.869  18.732  1.00 65.94           C
ATOM   3332  OE1 GLN A 421      78.043  32.128  19.150  1.00 61.86           O
ATOM   3333  NE2 GLN A 421      79.554  32.668  17.564  1.00 68.30           N
ATOM   3334  N   ASP A 422      78.038  32.777  23.775  1.00 48.64           N
ATOM   3335  CA  ASP A 422      77.585  32.909  25.151  1.00 43.31           C
ATOM   3336  C   ASP A 422      78.544  32.202  26.093  1.00 40.74           C
ATOM   3337  O   ASP A 422      78.949  32.770  27.101  1.00 39.83           O
ATOM   3338  CB  ASP A 422      76.162  32.352  25.305  1.00 47.62           C
ATOM   3339  CG  ASP A 422      75.124  33.217  24.624  1.00 46.61           C
ATOM   3340  OD1 ASP A 422      75.213  34.456  24.752  1.00 45.83           O
ATOM   3341  OD2 ASP A 422      74.220  32.667  23.956  1.00 49.61           O
ATOM   3342  N   PHE A 423      78.914  30.966  25.760  1.00 42.22           N
ATOM   3343  CA  PHE A 423      79.885  30.211  26.560  1.00 42.09           C
ATOM   3344  C   PHE A 423      81.270  30.869  26.584  1.00 41.71           C
ATOM   3345  O   PHE A 423      82.001  30.768  27.576  1.00 41.79           O
ATOM   3346  CB  PHE A 423      80.022  28.783  26.037  1.00 40.07           C
ATOM   3347  CG  PHE A 423      78.898  27.880  26.434  1.00 42.13           C
ATOM   3348  CD1 PHE A 423      78.937  27.198  27.635  1.00 40.89           C
ATOM   3349  CD2 PHE A 423      77.808  27.708  25.605  1.00 39.86           C
ATOM   3350  CE1 PHE A 423      77.918  26.369  28.000  1.00 40.63           C
ATOM   3351  CE2 PHE A 423      76.790  26.882  25.964  1.00 41.96           C
ATOM   3352  CZ  PHE A 423      76.837  26.206  27.161  1.00 42.65           C
ATOM   3353  N   GLU A 424      81.638  31.530  25.492  1.00 43.73           N
ATOM   3354  CA  GLU A 424      82.950  32.167  25.412  1.00 46.56           C
ATOM   3355  C   GLU A 424      83.063  33.324  26.381  1.00 42.16           C
ATOM   3356  O   GLU A 424      84.075  33.472  27.065  1.00 44.69           O
ATOM   3357  CB  GLU A 424      83.232  32.644  23.992  1.00 50.58           C
ATOM   3358  CG  GLU A 424      83.430  31.494  23.023  1.00 61.77           C
ATOM   3359  CD  GLU A 424      83.610  31.947  21.590  1.00 68.72           C
ATOM   3360  OE1 GLU A 424      83.401  33.154  21.311  1.00 67.12           O
ATOM   3361  OE2 GLU A 424      83.959  31.085  20.747  1.00 72.12           O
ATOM   3362  N   TRP A 425      82.018  34.141  26.435  1.00 42.89           N
ATOM   3363  CA  TRP A 425      81.937  35.222  27.408  1.00 39.33           C
ATOM   3364  C   TRP A 425      82.090  34.666  28.813  1.00 41.13           C
ATOM   3365  O   TRP A 425      82.767  35.247  29.661  1.00 36.11           O
ATOM   3366  CB  TRP A 425      80.603  35.955  27.266  1.00 42.07           C
ATOM   3367  CG  TRP A 425      80.331  36.975  28.330  1.00 43.00           C
ATOM   3368  CD1 TRP A 425      80.826  38.247  28.397  1.00 37.96           C
ATOM   3369  CD2 TRP A 425      79.467  36.816  29.463  1.00 40.78           C
ATOM   3370  NE1 TRP A 425      80.337  38.883  29.514  1.00 42.31           N
ATOM   3371  CE2 TRP A 425      79.502  38.031  30.184  1.00 37.93           C
ATOM   3372  CE3 TRP A 425      78.675  35.767  29.944  1.00 41.38           C
ATOM   3373  CZ2 TRP A 425      78.770  38.223  31.357  1.00 35.56           C
ATOM   3374  CZ3 TRP A 425      77.950  35.960  31.112  1.00 36.95           C
ATOM   3375  CH2 TRP A 425      78.011  37.179  31.809  1.00 36.72           C
ATOM   3376  N   LEU A 426      81.472  33.513  29.046  1.00 39.95           N
ATOM   3377  CA  LEU A 426      81.430  32.935  30.375  1.00 36.70           C
ATOM   3378  C   LEU A 426      82.774  32.335  30.739  1.00 37.82           C
ATOM   3379  O   LEU A 426      83.200  32.408  31.897  1.00 38.68           O
ATOM   3380  CB  LEU A 426      80.325  31.877  30.465  1.00 38.24           C
ATOM   3381  CG  LEU A 426      79.874  31.511  31.881  1.00 36.88           C
ATOM   3382  CD1 LEU A 426      79.141  32.675  32.512  1.00 32.62           C
ATOM   3383  CD2 LEU A 426      79.000  30.258  31.877  1.00 34.49           C
ATOM   3384  N   SER A 427      83.452  31.752  29.753  1.00 37.47           N
ATOM   3385  CA  SER A 427      84.770  31.174  30.001  1.00 40.40           C
ATOM   3386  C   SER A 427      85.805  32.215  30.439  1.00 40.27           C
ATOM   3387  O   SER A 427      86.750  31.876  31.153  1.00 42.29           O
ATOM   3388  CB  SER A 427      85.287  30.434  28.764  1.00 42.36           C
ATOM   3389  OG  SER A 427      85.488  31.320  27.680  1.00 46.28           O
ATOM   3390  N   LYS A 428      85.630  33.470  30.032  1.00 37.15           N
ATOM   3391  CA  LYS A 428      86.560  34.532  30.427  1.00 40.95           C
ATOM   3392  C   LYS A 428      86.377  35.007  31.876  1.00 41.20           C
ATOM   3393  O   LYS A 428      87.018  35.978  32.281  1.00 40.91           O
ATOM   3394  CB  LYS A 428      86.428  35.740  29.484  1.00 39.40           C
ATOM   3395  CG  LYS A 428      86.999  35.529  28.071  1.00 42.85           C
ATOM   3396  CD  LYS A 428      86.557  36.642  27.111  1.00 45.74           C
ATOM   3397  CE  LYS A 428      87.219  38.002  27.428  1.00 49.09           C
ATOM   3398  NZ  LYS A 428      88.622  38.069  26.893  1.00 44.62           N
ATOM   3399  N   ASN A 429      85.509  34.341  32.647  1.00 36.12           N
ATOM   3400  CA  ASN A 429      85.218  34.744  34.031  1.00 32.15           C
ATOM   3401  C   ASN A 429      84.745  36.195  34.147  1.00 38.92           C
ATOM   3402  O   ASN A 429      85.384  37.016  34.818  1.00 34.76           O
ATOM   3403  CB  ASN A 429      86.441  34.557  34.930  1.00 37.97           C
ATOM   3404  CG  ASN A 429      86.674  33.107  35.320  1.00 39.74           C
ATOM   3405  OD1 ASN A 429      85.994  32.195  34.838  1.00 40.80           O
ATOM   3406  ND2 ASN A 429      87.652  32.887  36.197  1.00 35.47           N
ATOM   3407  N   PRO A 430      83.610  36.518  33.511  1.00 33.97           N
ATOM   3408  CA  PRO A 430      83.175  37.911  33.571  1.00 32.34           C
ATOM   3409  C   PRO A 430      82.844  38.332  34.999  1.00 32.84           C
ATOM   3410  O   PRO A 430      82.598  37.500  35.877  1.00 32.97           O
ATOM   3411  CB  PRO A 430      81.928  37.920  32.694  1.00 32.34           C
ATOM   3412  CG  PRO A 430      81.361  36.564  32.895  1.00 34.63           C
ATOM   3413  CD  PRO A 430      82.565  35.644  32.951  1.00 32.41           C
ATOM   3414  N   LYS A 431      82.834  39.636  35.202  1.00 32.37           N
ATOM   3415  CA  LYS A 431      82.642  40.260  36.499  1.00 34.00           C
ATOM   3416  C   LYS A 431      81.368  39.806  37.240  1.00 32.64           C
ATOM   3417  O   LYS A 431      81.397  39.569  38.451  1.00 30.92           O
ATOM   3418  CB  LYS A 431      82.621  41.775  36.294  1.00 33.00           C
ATOM   3419  CG  LYS A 431      82.485  42.583  37.554  1.00 38.25           C
ATOM   3420  CD  LYS A 431      83.749  42.513  38.371  1.00 42.06           C
ATOM   3421  CE  LYS A 431      84.045  43.858  39.038  1.00 49.26           C
ATOM   3422  NZ  LYS A 431      85.372  43.803  39.762  1.00 58.05           N
ATOM   3423  N   ILE A 432      80.249  39.692  36.531  1.00 29.55           N
ATOM   3424  CA  ILE A 432      79.020  39.295  37.207  1.00 34.20           C
ATOM   3425  C   ILE A 432      79.156  37.864  37.735  1.00 28.31           C
ATOM   3426  O   ILE A 432      78.711  37.565  38.834  1.00 28.15           O
ATOM   3427  CB  ILE A 432      77.779  39.426  36.297  1.00 31.42           C
ATOM   3428  CG1 ILE A 432      76.503  39.146  37.099  1.00 31.60           C
ATOM   3429  CG2 ILE A 432      77.886  38.523  35.074  1.00 31.81           C
ATOM   3430  CD1 ILE A 432      75.243  39.653  36.422  1.00 32.45           C
ATOM   3431  N   LEU A 433      79.834  37.005  36.989  1.00 30.23           N
ATOM   3432  CA  LEU A 433      80.054  35.628  37.436  1.00 28.07           C
ATOM   3433  C   LEU A 433      81.000  35.556  38.628  1.00 32.54           C
ATOM   3434  O   LEU A 433      80.762  34.779  39.547  1.00 34.11           O
ATOM   3435  CB  LEU A 433      80.593  34.771  36.297  1.00 28.20           C
ATOM   3436  CG  LEU A 433      80.882  33.325  36.678  1.00 30.21           C
ATOM   3437  CD1 LEU A 433      79.583  32.637  37.125  1.00 31.11           C
ATOM   3438  CD2 LEU A 433      81.510  32.601  35.506  1.00 30.86           C
ATOM   3439  N   GLU A 434      82.067  36.359  38.619  1.00 31.93           N
ATOM   3440  CA  GLU A 434      83.032  36.358  39.716  1.00 29.83           C
ATOM   3441  C   GLU A 434      82.384  36.794  41.017  1.00 27.08           C
ATOM   3442  O   GLU A 434      82.666  36.237  42.076  1.00 27.32           O
ATOM   3443  CB  GLU A 434      84.218  37.288  39.423  1.00 33.63           C
ATOM   3444  CG  GLU A 434      85.046  36.926  38.224  1.00 39.63           C
ATOM   3445  CD  GLU A 434      86.400  36.336  38.600  1.00 49.25           C
ATOM   3446  OE1 GLU A 434      87.419  37.025  38.351  1.00 56.05           O
ATOM   3447  OE2 GLU A 434      86.449  35.188  39.116  1.00 42.44           O
ATOM   3448  N   ALA A 435      81.544  37.822  40.945  1.00 26.71           N
ATOM   3449  CA  ALA A 435      80.859  38.325  42.140  1.00 27.97           C
ATOM   3450  C   ALA A 435      79.967  37.232  42.748  1.00 28.72           C
ATOM   3451  O   ALA A 435      79.941  37.012  43.956  1.00 28.02           O
ATOM   3452  CB  ALA A 435      80.027  39.556  41.803  1.00 27.38           C
ATOM   3453  N   SER A 436      79.240  36.545  41.893  1.00 24.23           N
ATOM   3454  CA  SER A 436      78.388  35.459  42.345  1.00 30.05           C
ATOM   3455  C   SER A 436      79.215  34.354  43.039  1.00 32.44           C
ATOM   3456  O   SER A 436      78.852  33.832  44.113  1.00 27.21           O
ATOM   3457  CB  SER A 436      77.620  34.912  41.161  1.00 26.80           C
ATOM   3458  OG  SER A 436      76.840  33.817  41.558  1.00 39.39           O
ATOM   3459  N   VAL A 437      80.358  34.036  42.438  1.00 30.82           N
ATOM   3460  CA  VAL A 437      81.267  33.050  42.999  1.00 27.44           C
ATOM   3461  C   VAL A 437      81.835  33.531  44.341  1.00 27.74           C
ATOM   3462  O   VAL A 437      81.894  32.786  45.311  1.00 29.21           O
ATOM   3463  CB  VAL A 437      82.381  32.756  41.999  1.00 30.66           C
ATOM   3464  CG1 VAL A 437      83.470  31.904  42.631  1.00 28.78           C
ATOM   3465  CG2 VAL A 437      81.784  32.090  40.770  1.00 24.81           C
ATOM   3466  N   ILE A 438      82.193  34.804  44.406  1.00 27.48           N
ATOM   3467  CA  ILE A 438      82.720  35.398  45.630  1.00 29.28           C
ATOM   3468  C   ILE A 438      81.706  35.417  46.771  1.00 31.18           C
ATOM   3469  O   ILE A 438      82.052  35.166  47.930  1.00 32.48           O
ATOM   3470  CB  ILE A 438      83.215  36.824  45.345  1.00 30.17           C
ATOM   3471  CG1 ILE A 438      84.592  36.778  44.681  1.00 29.17           C
ATOM   3472  CG2 ILE A 438      83.240  37.683  46.608  1.00 29.77           C
ATOM   3473  CD1 ILE A 438      85.006  38.138  44.099  1.00 39.40           C
ATOM   3474  N   ILE A 439      80.451  35.718  46.448  1.00 32.86           N
ATOM   3475  CA  ILE A 439      79.375  35.642  47.434  1.00 28.15           C
ATOM   3476  C   ILE A 439      79.253  34.226  48.011  1.00 28.73           C
ATOM   3477  O   ILE A 439      79.213  34.050  49.230  1.00 31.22           O
ATOM   3478  CB  ILE A 439      78.038  36.086  46.825  1.00 27.73           C
ATOM   3479  CG1 ILE A 439      78.036  37.605  46.660  1.00 26.71           C
ATOM   3480  CG2 ILE A 439      76.863  35.645  47.704  1.00 25.40           C
ATOM   3481  CD1 ILE A 439      77.159  38.100  45.547  1.00 27.11           C
ATOM   3482  N   CYS A 440      79.179  33.216  47.151  1.00 27.73           N
ATOM   3483  CA  CYS A 440      79.143  31.835  47.642  1.00 31.03           C
ATOM   3484  C   CYS A 440      80.310  31.521  48.580  1.00 34.05           C
ATOM   3485  O   CYS A 440      80.118  31.002  49.682  1.00 33.03           O
ATOM   3486  CB  CYS A 440      79.153  30.835  46.489  1.00 30.35           C
ATOM   3487  SG  CYS A 440      78.864  29.086  47.015  1.00 33.04           S
ATOM   3488  N   ARG A 441      81.521  31.846  48.141  1.00 35.43           N
ATOM   3489  CA  ARG A 441      82.729  31.524  48.908  1.00 34.48           C
ATOM   3490  C   ARG A 441      82.761  32.208  50.286  1.00 35.68           C
ATOM   3491  O   ARG A 441      82.904  31.531  51.302  1.00 34.41           O
ATOM   3492  CB  ARG A 441      83.977  31.900  48.091  1.00 35.42           C
ATOM   3493  CG  ARG A 441      85.279  31.957  48.876  1.00 33.27           C
ATOM   3494  CD  ARG A 441      85.556  30.670  49.629  1.00 32.45           C
ATOM   3495  NE  ARG A 441      85.392  29.490  48.810  1.00 32.43           N
ATOM   3496  CZ  ARG A 441      84.822  28.369  49.242  1.00 38.18           C
ATOM   3497  NH1 ARG A 441      84.343  28.299  50.478  1.00 36.82           N
ATOM   3498  NH2 ARG A 441      84.723  27.316  48.440  1.00 38.35           N
ATOM   3499  N   VAL A 442      82.609  33.532  50.335  1.00 31.96           N
ATOM   3500  CA  VAL A 442      82.767  34.226  51.612  1.00 33.82           C
ATOM   3501  C   VAL A 442      81.599  33.969  52.587  1.00 37.79           C
ATOM   3502  O   VAL A 442      81.804  33.893  53.806  1.00 36.40           O
ATOM   3503  CB  VAL A 442      82.969  35.735  51.403  1.00 34.44           C
ATOM   3504  CG1 VAL A 442      84.175  35.959  50.529  1.00 33.71           C
ATOM   3505  CG2 VAL A 442      81.736  36.406  50.788  1.00 33.94           C
ATOM   3506  N   ILE A 443      80.385  33.800  52.069  1.00 37.22           N
ATOM   3507  CA  ILE A 443      79.253  33.494  52.941  1.00 38.00           C
ATOM   3508  C   ILE A 443      79.403  32.080  53.512  1.00 37.32           C
ATOM   3509  O   ILE A 443      79.171  31.844  54.703  1.00 37.03           O
ATOM   3510  CB  ILE A 443      77.904  33.632  52.199  1.00 36.22           C
ATOM   3511  CG1 ILE A 443      77.645  35.098  51.845  1.00 40.41           C
ATOM   3512  CG2 ILE A 443      76.776  33.101  53.042  1.00 39.45           C
ATOM   3513  CD1 ILE A 443      77.889  36.053  52.993  1.00 43.94           C
ATOM   3514  N   ASP A 444      79.815  31.145  52.664  1.00 35.41           N
ATOM   3515  CA  ASP A 444      80.060  29.788  53.122  1.00 40.12           C
ATOM   3516  C   ASP A 444      81.172  29.723  54.177  1.00 45.24           C
ATOM   3517  O   ASP A 444      81.046  28.976  55.153  1.00 43.88           O
ATOM   3518  CB  ASP A 444      80.404  28.878  51.942  1.00 39.83           C
ATOM   3519  CG  ASP A 444      80.705  27.454  52.373  1.00 46.47           C
ATOM   3520  OD1 ASP A 444      81.742  27.229  53.026  1.00 51.91           O
ATOM   3521  OD2 ASP A 444      79.912  26.546  52.059  1.00 54.77           O
ATOM   3522  N   ASP A 445      82.258  30.478  53.977  1.00 38.01           N
ATOM   3523  CA  ASP A 445      83.385  30.450  54.909  1.00 37.51           C
ATOM   3524  C   ASP A 445      82.992  31.020  56.267  1.00 39.33           C
ATOM   3525  O   ASP A 445      83.403  30.503  57.299  1.00 42.84           O
ATOM   3526  CB  ASP A 445      84.588  31.230  54.362  1.00 37.59           C
ATOM   3527  CG  ASP A 445      85.244  30.560  53.161  1.00 38.44           C
ATOM   3528  OD1 ASP A 445      84.893  29.415  52.795  1.00 38.82           O
ATOM   3529  OD2 ASP A 445      86.139  31.195  52.578  1.00 39.32           O
ATOM   3530  N   THR A 446      82.214  32.101  56.253  1.00 41.34           N
ATOM   3531  CA  THR A 446      81.670  32.698  57.471  1.00 44.45           C
ATOM   3532  C   THR A 446      80.783  31.709  58.233  1.00 44.45           C
ATOM   3533  O   THR A 446      80.828  31.621  59.460  1.00 44.70           O
ATOM   3534  CB  THR A 446      80.840  33.962  57.156  1.00 42.72           C
ATOM   3535  OG1 THR A 446      81.682  34.959  56.566  1.00 47.70           O
ATOM   3536  CG2 THR A 446      80.227  34.534  58.421  1.00 44.66           C
ATOM   3537  N   ALA A 447      79.986  30.953  57.494  1.00 43.24           N
ATOM   3538  CA  ALA A 447      78.996  30.086  58.117  1.00 54.02           C
ATOM   3539  C   ALA A 447      79.607  28.760  58.559  1.00 50.90           C
ATOM   3540  O   ALA A 447      79.181  28.180  59.551  1.00 53.86           O
ATOM   3541  CB  ALA A 447      77.829  29.842  57.166  1.00 47.94           C
ATOM   3542  N   THR A 448      80.607  28.280  57.830  1.00 46.22           N
ATOM   3543  CA  THR A 448      81.171  26.977  58.143  1.00 50.35           C
ATOM   3544  C   THR A 448      82.524  27.065  58.828  1.00 52.36           C
ATOM   3545  O   THR A 448      83.246  26.081  58.888  1.00 63.99           O
ATOM   3546  CB  THR A 448      81.311  26.104  56.880  1.00 53.90           C
ATOM   3547  OG1 THR A 448      82.192  26.738  55.950  1.00 53.08           O
ATOM   3548  CG2 THR A 448      79.954  25.878  56.222  1.00 54.54           C
ATOM   3549  N   TYR A 449      82.859  28.228  59.367  1.00 54.70           N
ATOM   3550  CA  TYR A 449      84.182  28.409  59.947  1.00 62.45           C
ATOM   3551  C   TYR A 449      84.413  27.531  61.172  1.00 67.73           C
ATOM   3552  O   TYR A 449      85.256  26.635  61.140  1.00 70.76           O
ATOM   3553  CB  TYR A 449      84.424  29.871  60.317  1.00 54.21           C
ATOM   3554  CG  TYR A 449      85.671  30.086  61.144  1.00 57.04           C
ATOM   3555  CD1 TYR A 449      86.916  29.648  60.696  1.00 58.93           C
ATOM   3556  CD2 TYR A 449      85.609  30.739  62.367  1.00 61.91           C
ATOM   3557  CE1 TYR A 449      88.066  29.851  61.452  1.00 61.25           C
ATOM   3558  CE2 TYR A 449      86.747  30.945  63.130  1.00 64.45           C
ATOM   3559  CZ  TYR A 449      87.975  30.504  62.670  1.00 65.23           C
ATOM   3560  OH  TYR A 449      89.102  30.714  63.441  1.00 63.00           O
ATOM   3561  N   GLU A 450      83.669  27.791  62.244  1.00 66.63           N
ATOM   3562  CA  GLU A 450      83.959  27.177  63.535  1.00 69.41           C
ATOM   3563  C   GLU A 450      83.775  25.666  63.522  1.00 73.99           C
ATOM   3564  O   GLU A 450      84.397  24.958  64.312  1.00 76.17           O
ATOM   3565  CB  GLU A 450      83.105  27.818  64.628  1.00 70.69           C
ATOM   3566  CG  GLU A 450      83.702  29.132  65.141  1.00 71.86           C
ATOM   3567  CD  GLU A 450      82.677  30.242  65.280  1.00 80.66           C
ATOM   3568  OE1 GLU A 450      81.465  29.936  65.308  1.00 87.87           O
ATOM   3569  OE2 GLU A 450      83.084  31.425  65.356  1.00 81.20           O
ATOM   3570  O   VAL A 451      84.501  22.082  62.176  1.00 84.23           O
ATOM   3571  N   VAL A 451      82.953  25.167  62.609  1.00 72.35           N
ATOM   3572  CA  VAL A 451      82.764  23.728  62.494  1.00 74.99           C
ATOM   3573  C   VAL A 451      83.939  23.095  61.755  1.00 79.87           C
ATOM   3574  CB  VAL A 451      81.436  23.392  61.775  1.00 75.02           C
ATOM   3575  CG1 VAL A 451      81.486  22.008  61.142  1.00 73.85           C
ATOM   3576  CG2 VAL A 451      80.269  23.499  62.751  1.00 79.16           C
ATOM   3577  O   GLU A 452      87.701  22.675  60.137  1.00 81.08           O
ATOM   3578  N   GLU A 452      84.333  23.718  60.659  1.00 77.60           N
ATOM   3579  CA  GLU A 452      85.367  23.156  59.813  1.00 79.83           C
ATOM   3580  C   GLU A 452      86.740  23.374  60.447  1.00 80.92           C
ATOM   3581  CB  GLU A 452      85.268  23.787  58.430  1.00 74.62           C
ATOM   3582  CG  GLU A 452      86.041  23.093  57.334  1.00 83.73           C
ATOM   3583  CD  GLU A 452      85.369  23.247  55.980  1.00 88.74           C
ATOM   3584  OE1 GLU A 452      84.328  23.951  55.931  1.00 80.00           O
ATOM   3585  OE2 GLU A 452      85.891  22.649  55.011  1.00 92.33           O
ATOM   3586  O   LYS A 453      89.351  23.073  63.418  1.00 82.01           O
ATOM   3587  N   LYS A 453      86.809  24.352  61.345  1.00 79.31           N
ATOM   3588  CA  LYS A 453      88.000  24.597  62.145  1.00 76.98           C
ATOM   3589  C   LYS A 453      88.217  23.477  63.155  1.00 83.71           C
ATOM   3590  CB  LYS A 453      87.881  25.936  62.869  1.00 72.81           C
ATOM   3591  CG  LYS A 453      88.836  26.112  64.039  1.00 74.49           C
ATOM   3592  CD  LYS A 453      88.872  27.562  64.516  1.00 70.02           C
ATOM   3593  CE  LYS A 453      89.798  27.723  65.704  1.00 74.41           C
ATOM   3594  NZ  LYS A 453      90.410  29.075  65.732  1.00 76.58           N
ATOM   3595  O   SER A 454      87.901  19.665  64.799  1.00 85.45           O
ATOM   3596  N   SER A 454      87.117  22.985  63.721  1.00 86.62           N
ATOM   3597  CA  SER A 454      87.167  21.937  64.733  1.00 85.06           C
ATOM   3598  C   SER A 454      87.447  20.576  64.116  1.00 85.05           C
ATOM   3599  CB  SER A 454      85.863  21.896  65.529  1.00 85.31           C
ATOM   3600  OG  SER A 454      85.696  23.085  66.287  1.00 85.97           O
ATOM   3601  O   ARG A 455      89.672  18.361  61.293  1.00 92.46           O
ATOM   3602  N   ARG A 455      87.178  20.439  62.821  1.00 89.45           N
ATOM   3603  CA  ARG A 455      87.553  19.227  62.094  1.00 94.26           C
ATOM   3604  C   ARG A 455      89.040  19.335  61.714  1.00 91.75           C
ATOM   3605  CB  ARG A 455      86.634  19.019  60.874  1.00100.41           C
ATOM   3606  CG  ARG A 455      87.113  17.992  59.846  1.00110.54           C
ATOM   3607  CD  ARG A 455      86.015  17.510  58.891  1.00115.39           C
ATOM   3608  NE  ARG A 455      84.811  18.332  58.923  1.00121.91           N
ATOM   3609  CZ  ARG A 455      83.637  17.920  59.394  1.00128.84           C
ATOM   3610  NH1 ARG A 455      82.593  18.738  59.380  1.00127.16           N
ATOM   3611  NH2 ARG A 455      83.502  16.690  59.873  1.00131.78           N
ATOM   3612  O   GLY A 456      92.690  21.176  60.158  1.00 72.36           O
ATOM   3613  N   GLY A 456      89.601  20.525  61.915  1.00 87.37           N
ATOM   3614  CA  GLY A 456      91.032  20.733  61.799  1.00 83.57           C
ATOM   3615  C   GLY A 456      91.515  21.293  60.479  1.00 81.38           C
ATOM   3616  O   GLN A 457      90.826  24.796  58.364  1.00 68.07           O
ATOM   3617  N   GLN A 457      90.625  21.913  59.709  1.00 82.17           N
ATOM   3618  CA  GLN A 457      91.019  22.392  58.384  1.00 78.35           C
ATOM   3619  C   GLN A 457      91.560  23.810  58.479  1.00 70.91           C
ATOM   3620  CB  GLN A 457      89.865  22.317  57.387  1.00 77.22           C
ATOM   3621  CG  GLN A 457      89.283  20.920  57.269  1.00 82.19           C
ATOM   3622  CD  GLN A 457      88.660  20.605  55.908  1.00 85.46           C
ATOM   3623  OE1 GLN A 457      88.548  21.457  55.039  1.00 91.83           O
ATOM   3624  NE2 GLN A 457      88.266  19.359  55.726  1.00 84.66           N
ATOM   3625  O   ILE A 458      94.122  27.236  58.035  1.00 57.60           O
ATOM   3626  N   ILE A 458      92.872  23.872  58.683  1.00 71.09           N
ATOM   3627  CA  ILE A 458      93.601  25.088  59.030  1.00 64.06           C
ATOM   3628  C   ILE A 458      93.704  26.087  57.861  1.00 57.22           C
ATOM   3629  CB  ILE A 458      95.013  24.700  59.538  1.00 63.99           C
ATOM   3630  CG1 ILE A 458      95.703  25.878  60.229  1.00 68.51           C
ATOM   3631  CG2 ILE A 458      95.847  24.111  58.401  1.00 56.90           C
ATOM   3632  CD1 ILE A 458      95.005  26.336  61.508  1.00 69.22           C
ATOM   3633  O   ALA A 459      91.581  27.265  53.958  1.00 51.26           O
ATOM   3634  N   ALA A 459      93.305  25.647  56.673  1.00 56.99           N
ATOM   3635  CA  ALA A 459      93.283  26.510  55.497  1.00 53.54           C
ATOM   3636  C   ALA A 459      91.866  27.013  55.132  1.00 56.10           C
ATOM   3637  CB  ALA A 459      93.893  25.776  54.313  1.00 43.86           C
ATOM   3638  O   SER A 460      90.557  29.839  56.407  1.00 49.75           O
ATOM   3639  N   SER A 460      90.980  27.151  56.119  1.00 52.58           N
ATOM   3640  CA  SER A 460      89.647  27.698  55.853  1.00 52.41           C
ATOM   3641  C   SER A 460      89.741  29.212  55.736  1.00 46.34           C
ATOM   3642  CB  SER A 460      88.643  27.302  56.948  1.00 51.83           C
ATOM   3643  OG  SER A 460      88.993  27.896  58.189  1.00 55.14           O
ATOM   3644  O   GLY A 461      89.975  33.109  55.523  1.00 41.96           O
ATOM   3645  N   GLY A 461      88.892  29.786  54.889  1.00 46.48           N
ATOM   3646  CA  GLY A 461      88.945  31.193  54.533  1.00 43.17           C
ATOM   3647  C   GLY A 461      89.152  32.198  55.644  1.00 45.91           C
ATOM   3648  N   ILE A 462      88.406  32.048  56.730  1.00 47.34           N
ATOM   3649  CA  ILE A 462      88.498  33.011  57.821  1.00 47.85           C
ATOM   3650  C   ILE A 462      89.881  32.944  58.469  1.00 47.88           C
ATOM   3651  O   ILE A 462      90.458  33.975  58.821  1.00 49.89           O
ATOM   3652  CB  ILE A 462      87.386  32.779  58.869  1.00 49.57           C
ATOM   3653  CG1 ILE A 462      86.025  33.076  58.244  1.00 48.59           C
ATOM   3654  CG2 ILE A 462      87.564  33.686  60.071  1.00 46.19           C
ATOM   3655  CD1 ILE A 462      85.875  34.525  57.833  1.00 40.36           C
ATOM   3656  N   GLU A 463      90.426  31.735  58.585  1.00 50.82           N
ATOM   3657  CA  GLU A 463      91.748  31.544  59.181  1.00 50.91           C
ATOM   3658  C   GLU A 463      92.823  32.245  58.361  1.00 47.29           C
ATOM   3659  O   GLU A 463      93.577  33.072  58.883  1.00 48.17           O
ATOM   3660  CB  GLU A 463      92.071  30.053  59.325  1.00 54.83           C
ATOM   3661  CG  GLU A 463      93.221  29.791  60.292  1.00 62.31           C
ATOM   3662  CD  GLU A 463      92.734  29.539  61.707  1.00 68.86           C
ATOM   3663  OE1 GLU A 463      91.773  28.757  61.879  1.00 73.19           O
ATOM   3664  OE2 GLU A 463      93.294  30.147  62.645  1.00 68.91           O
ATOM   3665  N   CYS A 464      92.873  31.913  57.073  1.00 46.02           N
ATOM   3666  CA  CYS A 464      93.716  32.614  56.114  1.00 44.31           C
ATOM   3667  C   CYS A 464      93.606  34.122  56.279  1.00 47.05           C
ATOM   3668  O   CYS A 464      94.601  34.833  56.229  1.00 42.82           O
ATOM   3669  CB  CYS A 464      93.340  32.226  54.682  1.00 39.28           C
ATOM   3670  SG  CYS A 464      93.566  30.481  54.304  1.00 42.34           S
ATOM   3671  N   CYS A 465      92.381  34.595  56.491  1.00 47.55           N
ATOM   3672  CA  CYS A 465      92.115  36.017  56.609  1.00 46.67           C
ATOM   3673  C   CYS A 465      92.625  36.580  57.927  1.00 46.48           C
ATOM   3674  O   CYS A 465      93.139  37.698  57.969  1.00 46.70           O
ATOM   3675  CB  CYS A 465      90.609  36.290  56.469  1.00 47.62           C
ATOM   3676  SG  CYS A 465      90.208  38.037  56.528  1.00 42.89           S
ATOM   3677  N   MET A 466      92.455  35.814  59.004  1.00 48.83           N
ATOM   3678  CA  MET A 466      92.927  36.229  60.324  1.00 51.34           C
ATOM   3679  C   MET A 466      94.450  36.332  60.333  1.00 52.28           C
ATOM   3680  O   MET A 466      95.019  37.361  60.709  1.00 54.99           O
ATOM   3681  CB  MET A 466      92.466  35.248  61.402  1.00 51.67           C
ATOM   3682  CG  MET A 466      90.964  35.208  61.617  1.00 54.72           C
ATOM   3683  SD  MET A 466      90.502  34.072  62.931  1.00 57.66           S
ATOM   3684  CE  MET A 466      91.343  32.598  62.422  1.00 60.04           C
ATOM   3685  N   ARG A 467      95.092  35.249  59.903  1.00 55.42           N
ATOM   3686  CA  ARG A 467      96.553  35.156  59.828  1.00 53.36           C
ATOM   3687  C   ARG A 467      97.136  36.254  58.940  1.00 52.04           C
ATOM   3688  O   ARG A 467      98.061  36.963  59.340  1.00 58.55           O
ATOM   3689  CB  ARG A 467      96.956  33.770  59.308  1.00 50.46           C
ATOM   3690  CG  ARG A 467      98.447  33.518  59.228  1.00 53.07           C
ATOM   3691  CD  ARG A 467      98.748  32.024  59.180  1.00 51.70           C
ATOM   3692  NE  ARG A 467     100.184  31.795  59.256  1.00 51.83           N
ATOM   3693  CZ  ARG A 467     100.773  30.617  59.419  1.00 50.72           C
ATOM   3694  NH1 ARG A 467     100.059  29.503  59.528  1.00 50.12           N
ATOM   3695  NH2 ARG A 467     102.101  30.559  59.471  1.00 51.30           N
ATOM   3696  N   ASP A 468      96.571  36.405  57.746  1.00 52.25           N
ATOM   3697  CA  ASP A 468      97.053  37.378  56.770  1.00 50.64           C
ATOM   3698  C   ASP A 468      97.107  38.802  57.327  1.00 54.84           C
ATOM   3699  O   ASP A 468      98.182  39.410  57.369  1.00 55.89           O
ATOM   3700  CB  ASP A 468      96.167  37.341  55.525  1.00 49.43           C
ATOM   3701  CG  ASP A 468      96.867  37.858  54.297  1.00 47.48           C
ATOM   3702  OD1 ASP A 468      97.900  38.533  54.457  1.00 51.50           O
ATOM   3703  OD2 ASP A 468      96.388  37.588  53.172  1.00 42.55           O
ATOM   3704  N   TYR A 469      95.954  39.321  57.760  1.00 51.91           N
ATOM   3705  CA  TYR A 469      95.836  40.723  58.202  1.00 51.35           C
ATOM   3706  C   TYR A 469      96.131  40.917  59.686  1.00 53.06           C
ATOM   3707  O   TYR A 469      96.187  42.051  60.169  1.00 56.07           O
ATOM   3708  CB  TYR A 469      94.429  41.275  57.912  1.00 49.91           C
ATOM   3709  CG  TYR A 469      94.065  41.306  56.449  1.00 48.99           C
ATOM   3710  CD1 TYR A 469      94.412  42.382  55.647  1.00 53.94           C
ATOM   3711  CD2 TYR A 469      93.379  40.255  55.869  1.00 48.92           C
ATOM   3712  CE1 TYR A 469      94.082  42.406  54.301  1.00 57.40           C
ATOM   3713  CE2 TYR A 469      93.048  40.269  54.526  1.00 50.68           C
ATOM   3714  CZ  TYR A 469      93.401  41.341  53.748  1.00 55.29           C
ATOM   3715  OH  TYR A 469      93.064  41.344  52.414  1.00 61.18           O
ATOM   3716  O   GLY A 470      95.433  41.436  63.266  1.00 52.75           O
ATOM   3717  N   GLY A 470      96.305  39.815  60.408  1.00 53.49           N
ATOM   3718  CA  GLY A 470      96.542  39.884  61.837  1.00 49.76           C
ATOM   3719  C   GLY A 470      95.331  40.444  62.551  1.00 55.57           C
ATOM   3720  N   ILE A 471      94.178  39.807  62.348  1.00 56.46           N
ATOM   3721  CA  ILE A 471      92.924  40.308  62.908  1.00 55.85           C
ATOM   3722  C   ILE A 471      92.114  39.189  63.555  1.00 52.10           C
ATOM   3723  O   ILE A 471      92.344  38.012  63.287  1.00 52.84           O
ATOM   3724  CB  ILE A 471      92.050  41.000  61.832  1.00 54.17           C
ATOM   3725  CG1 ILE A 471      91.811  40.055  60.653  1.00 53.00           C
ATOM   3726  CG2 ILE A 471      92.689  42.296  61.365  1.00 48.03           C
ATOM   3727  CD1 ILE A 471      90.938  40.631  59.565  1.00 50.10           C
ATOM   3728  N   SER A 472      91.162  39.570  64.402  1.00 56.48           N
ATOM   3729  CA  SER A 472      90.322  38.611  65.116  1.00 56.46           C
ATOM   3730  C   SER A 472      89.347  37.895  64.197  1.00 56.46           C
ATOM   3731  O   SER A 472      89.142  38.305  63.054  1.00 55.89           O
ATOM   3732  CB  SER A 472      89.544  39.313  66.225  1.00 56.33           C
ATOM   3733  OG  SER A 472      88.589  40.201  65.674  1.00 64.01           O
ATOM   3734  N   THR A 473      88.745  36.824  64.711  1.00 59.84           N
ATOM   3735  CA  THR A 473      87.731  36.082  63.972  1.00 57.26           C
ATOM   3736  C   THR A 473      86.584  36.994  63.532  1.00 58.25           C
ATOM   3737  O   THR A 473      86.075  36.869  62.414  1.00 55.08           O
ATOM   3738  CB  THR A 473      87.160  34.922  64.803  1.00 60.73           C
ATOM   3739  OG1 THR A 473      88.201  33.982  65.094  1.00 64.21           O
ATOM   3740  CG2 THR A 473      86.049  34.214  64.038  1.00 58.18           C
ATOM   3741  N   LYS A 474      86.196  37.923  64.403  1.00 59.96           N
ATOM   3742  CA  LYS A 474      85.082  38.819  64.106  1.00 59.35           C
ATOM   3743  C   LYS A 474      85.452  39.802  62.996  1.00 57.34           C
ATOM   3744  O   LYS A 474      84.683  39.994  62.051  1.00 59.46           O
ATOM   3745  CB  LYS A 474      84.638  39.569  65.367  1.00 64.41           C
ATOM   3746  CG  LYS A 474      83.534  40.600  65.125  1.00 69.86           C
ATOM   3747  CD  LYS A 474      82.464  40.577  66.214  1.00 74.76           C
ATOM   3748  CE  LYS A 474      83.026  40.919  67.586  1.00 76.39           C
ATOM   3749  NZ  LYS A 474      83.535  42.318  67.650  1.00 80.70           N
ATOM   3750  N   GLU A 475      86.631  40.408  63.106  1.00 57.24           N
ATOM   3751  CA  GLU A 475      87.104  41.368  62.105  1.00 55.84           C
ATOM   3752  C   GLU A 475      87.250  40.713  60.740  1.00 49.05           C
ATOM   3753  O   GLU A 475      87.048  41.350  59.712  1.00 50.62           O
ATOM   3754  CB  GLU A 475      88.448  41.974  62.513  1.00 55.50           C
ATOM   3755  CG  GLU A 475      88.435  42.844  63.753  1.00 58.24           C
ATOM   3756  CD  GLU A 475      89.847  43.114  64.258  1.00 65.62           C
ATOM   3757  OE1 GLU A 475      90.598  42.133  64.467  1.00 62.63           O
ATOM   3758  OE2 GLU A 475      90.213  44.296  64.435  1.00 67.51           O
ATOM   3759  N   ALA A 476      87.625  39.440  60.737  1.00 48.40           N
ATOM   3760  CA  ALA A 476      87.748  38.695  59.494  1.00 48.14           C
ATOM   3761  C   ALA A 476      86.364  38.432  58.889  1.00 46.60           C
ATOM   3762  O   ALA A 476      86.172  38.530  57.677  1.00 41.60           O
ATOM   3763  CB  ALA A 476      88.487  37.397  59.727  1.00 46.68           C
ATOM   3764  N   MET A 477      85.397  38.108  59.739  1.00 48.53           N
ATOM   3765  CA  MET A 477      84.045  37.882  59.255  1.00 44.70           C
ATOM   3766  C   MET A 477      83.467  39.176  58.693  1.00 44.65           C
ATOM   3767  O   MET A 477      82.804  39.150  57.659  1.00 44.37           O
ATOM   3768  CB  MET A 477      83.171  37.287  60.359  1.00 46.04           C
ATOM   3769  CG  MET A 477      83.425  35.791  60.529  1.00 46.92           C
ATOM   3770  SD  MET A 477      82.548  34.973  61.866  1.00 56.20           S
ATOM   3771  CE  MET A 477      82.993  33.270  61.570  1.00 45.54           C
ATOM   3772  N   ALA A 478      83.777  40.306  59.327  1.00 42.72           N
ATOM   3773  CA  ALA A 478      83.325  41.601  58.826  1.00 45.71           C
ATOM   3774  C   ALA A 478      83.922  41.919  57.458  1.00 48.13           C
ATOM   3775  O   ALA A 478      83.234  42.431  56.571  1.00 48.78           O
ATOM   3776  CB  ALA A 478      83.668  42.708  59.818  1.00 44.68           C
ATOM   3777  N   LYS A 479      85.208  41.634  57.297  1.00 45.06           N
ATOM   3778  CA  LYS A 479      85.864  41.810  56.012  1.00 44.69           C
ATOM   3779  C   LYS A 479      85.187  40.934  54.958  1.00 40.66           C
ATOM   3780  O   LYS A 479      84.941  41.376  53.840  1.00 42.37           O
ATOM   3781  CB  LYS A 479      87.361  41.480  56.123  1.00 48.88           C
ATOM   3782  CG  LYS A 479      88.146  41.617  54.820  1.00 49.90           C
ATOM   3783  CD  LYS A 479      87.968  42.999  54.200  1.00 57.68           C
ATOM   3784  CE  LYS A 479      88.202  42.987  52.687  1.00 57.14           C
ATOM   3785  NZ  LYS A 479      89.528  42.401  52.333  1.00 55.49           N
ATOM   3786  N   PHE A 480      84.872  39.696  55.313  1.00 39.74           N
ATOM   3787  CA  PHE A 480      84.209  38.811  54.359  1.00 41.56           C
ATOM   3788  C   PHE A 480      82.806  39.319  54.032  1.00 38.17           C
ATOM   3789  O   PHE A 480      82.349  39.193  52.904  1.00 38.00           O
ATOM   3790  CB  PHE A 480      84.148  37.378  54.881  1.00 37.00           C
ATOM   3791  CG  PHE A 480      85.357  36.560  54.537  1.00 44.89           C
ATOM   3792  CD1 PHE A 480      86.609  37.154  54.431  1.00 44.39           C
ATOM   3793  CD2 PHE A 480      85.244  35.206  54.302  1.00 39.34           C
ATOM   3794  CE1 PHE A 480      87.717  36.405  54.111  1.00 41.37           C
ATOM   3795  CE2 PHE A 480      86.359  34.452  53.992  1.00 42.53           C
ATOM   3796  CZ  PHE A 480      87.589  35.053  53.895  1.00 45.66           C
ATOM   3797  N   GLN A 481      82.140  39.915  55.013  1.00 41.21           N
ATOM   3798  CA  GLN A 481      80.852  40.568  54.772  1.00 43.87           C
ATOM   3799  C   GLN A 481      80.940  41.692  53.731  1.00 43.11           C
ATOM   3800  O   GLN A 481      80.098  41.768  52.829  1.00 40.42           O
ATOM   3801  CB  GLN A 481      80.287  41.110  56.081  1.00 42.02           C
ATOM   3802  CG  GLN A 481      79.254  40.203  56.698  1.00 56.67           C
ATOM   3803  CD  GLN A 481      77.977  40.138  55.868  1.00 64.16           C
ATOM   3804  OE1 GLN A 481      77.457  39.051  55.586  1.00 62.53           O
ATOM   3805  NE2 GLN A 481      77.466  41.308  55.469  1.00 62.42           N
ATOM   3806  N   ASN A 482      81.954  42.554  53.846  1.00 41.14           N
ATOM   3807  CA  ASN A 482      82.115  43.665  52.903  1.00 37.54           C
ATOM   3808  C   ASN A 482      82.395  43.177  51.501  1.00 34.97           C
ATOM   3809  O   ASN A 482      82.004  43.809  50.523  1.00 35.99           O
ATOM   3810  CB  ASN A 482      83.246  44.617  53.322  1.00 45.19           C
ATOM   3811  CG  ASN A 482      83.003  45.264  54.669  1.00 53.62           C
ATOM   3812  OD1 ASN A 482      83.932  45.418  55.462  1.00 60.89           O
ATOM   3813  ND2 ASN A 482      81.754  45.643  54.940  1.00 52.09           N
ATOM   3814  N   MET A 483      83.102  42.059  51.406  1.00 37.62           N
ATOM   3815  CA  MET A 483      83.378  41.460  50.118  1.00 36.06           C
ATOM   3816  C   MET A 483      82.083  40.983  49.483  1.00 34.36           C
ATOM   3817  O   MET A 483      81.898  41.112  48.273  1.00 33.76           O
ATOM   3818  CB  MET A 483      84.361  40.306  50.268  1.00 36.76           C
ATOM   3819  CG  MET A 483      85.782  40.766  50.547  1.00 37.55           C
ATOM   3820  SD  MET A 483      86.833  39.377  51.031  1.00 42.01           S
ATOM   3821  CE  MET A 483      86.767  38.336  49.574  1.00 24.12           C
ATOM   3822  N   ALA A 484      81.185  40.447  50.304  1.00 32.18           N
ATOM   3823  CA  ALA A 484      79.869  40.046  49.817  1.00 34.75           C
ATOM   3824  C   ALA A 484      79.077  41.269  49.354  1.00 31.55           C
ATOM   3825  O   ALA A 484      78.480  41.255  48.283  1.00 31.92           O
ATOM   3826  CB  ALA A 484      79.100  39.270  50.899  1.00 32.94           C
ATOM   3827  N   GLU A 485      79.097  42.340  50.135  1.00 34.47           N
ATOM   3828  CA  GLU A 485      78.350  43.563  49.767  1.00 38.00           C
ATOM   3829  C   GLU A 485      78.859  44.214  48.476  1.00 36.98           C
ATOM   3830  O   GLU A 485      78.074  44.681  47.634  1.00 35.14           O
ATOM   3831  CB  GLU A 485      78.408  44.578  50.908  1.00 37.50           C
ATOM   3832  CG  GLU A 485      77.577  44.173  52.117  1.00 45.59           C
ATOM   3833  CD  GLU A 485      77.923  44.971  53.362  1.00 56.04           C
ATOM   3834  OE1 GLU A 485      78.541  46.047  53.221  1.00 55.80           O
ATOM   3835  OE2 GLU A 485      77.583  44.517  54.479  1.00 60.44           O
ATOM   3836  N   THR A 486      80.182  44.251  48.342  1.00 37.16           N
ATOM   3837  CA  THR A 486      80.862  44.697  47.130  1.00 32.67           C
ATOM   3838  C   THR A 486      80.436  43.840  45.941  1.00 29.44           C
ATOM   3839  O   THR A 486      80.094  44.349  44.875  1.00 29.66           O
ATOM   3840  CB  THR A 486      82.403  44.620  47.326  1.00 36.70           C
ATOM   3841  OG1 THR A 486      82.820  45.697  48.167  1.00 39.14           O
ATOM   3842  CG2 THR A 486      83.151  44.680  45.998  1.00 30.04           C
ATOM   3843  N   ALA A 487      80.428  42.530  46.150  1.00 27.90           N
ATOM   3844  CA  ALA A 487      80.005  41.594  45.113  1.00 29.87           C
ATOM   3845  C   ALA A 487      78.541  41.806  44.695  1.00 29.32           C
ATOM   3846  O   ALA A 487      78.208  41.741  43.506  1.00 28.69           O
ATOM   3847  CB  ALA A 487      80.229  40.160  45.582  1.00 29.07           C
ATOM   3848  N   TRP A 488      77.659  42.075  45.649  1.00 29.51           N
ATOM   3849  CA  TRP A 488      76.265  42.342  45.272  1.00 28.65           C
ATOM   3850  C   TRP A 488      76.160  43.617  44.426  1.00 29.35           C
ATOM   3851  O   TRP A 488      75.377  43.665  43.473  1.00 27.69           O
ATOM   3852  CB  TRP A 488      75.357  42.420  46.508  1.00 25.41           C
ATOM   3853  CG  TRP A 488      74.751  41.082  46.811  1.00 26.76           C
ATOM   3854  CD1 TRP A 488      75.077  40.236  47.834  1.00 27.27           C
ATOM   3855  CD2 TRP A 488      73.750  40.410  46.039  1.00 29.40           C
ATOM   3856  NE1 TRP A 488      74.315  39.089  47.762  1.00 26.17           N
ATOM   3857  CE2 TRP A 488      73.495  39.172  46.668  1.00 26.88           C
ATOM   3858  CE3 TRP A 488      73.018  40.752  44.893  1.00 28.30           C
ATOM   3859  CZ2 TRP A 488      72.549  38.269  46.183  1.00 27.69           C
ATOM   3860  CZ3 TRP A 488      72.071  39.851  44.411  1.00 29.61           C
ATOM   3861  CH2 TRP A 488      71.851  38.621  45.053  1.00 29.27           C
ATOM   3862  N   LYS A 489      76.970  44.632  44.733  1.00 30.84           N
ATOM   3863  CA  LYS A 489      76.942  45.845  43.918  1.00 27.67           C
ATOM   3864  C   LYS A 489      77.392  45.521  42.508  1.00 28.48           C
ATOM   3865  O   LYS A 489      76.831  46.048  41.557  1.00 28.26           O
ATOM   3866  CB  LYS A 489      77.807  46.943  44.525  1.00 29.00           C
ATOM   3867  CG  LYS A 489      77.191  47.541  45.763  1.00 29.53           C
ATOM   3868  CD  LYS A 489      78.176  48.359  46.554  1.00 34.27           C
ATOM   3869  CE  LYS A 489      77.503  48.910  47.794  1.00 40.70           C
ATOM   3870  NZ  LYS A 489      78.485  49.604  48.669  1.00 48.07           N
ATOM   3871  N   ASP A 490      78.374  44.617  42.379  1.00 27.11           N
ATOM   3872  CA  ASP A 490      78.878  44.200  41.071  1.00 27.09           C
ATOM   3873  C   ASP A 490      77.846  43.413  40.267  1.00 27.90           C
ATOM   3874  O   ASP A 490      77.661  43.660  39.076  1.00 30.25           O
ATOM   3875  CB  ASP A 490      80.165  43.361  41.217  1.00 30.51           C
ATOM   3876  CG  ASP A 490      81.350  44.186  41.720  1.00 35.78           C
ATOM   3877  OD1 ASP A 490      81.297  45.438  41.640  1.00 31.89           O
ATOM   3878  OD2 ASP A 490      82.341  43.576  42.184  1.00 34.98           O
ATOM   3879  N   ILE A 491      77.207  42.433  40.897  1.00 27.40           N
ATOM   3880  CA  ILE A 491      76.064  41.764  40.272  1.00 26.71           C
ATOM   3881  C   ILE A 491      75.049  42.791  39.760  1.00 26.88           C
ATOM   3882  O   ILE A 491      74.674  42.768  38.586  1.00 26.40           O
ATOM   3883  CB  ILE A 491      75.389  40.796  41.245  1.00 28.22           C
ATOM   3884  CG1 ILE A 491      76.282  39.565  41.437  1.00 26.94           C
ATOM   3885  CG2 ILE A 491      73.987  40.400  40.737  1.00 26.73           C
ATOM   3886  CD1 ILE A 491      75.692  38.493  42.308  1.00 28.25           C
ATOM   3887  N   ASN A 492      74.654  43.725  40.622  1.00 26.05           N
ATOM   3888  CA  ASN A 492      73.612  44.691  40.270  1.00 27.13           C
ATOM   3889  C   ASN A 492      74.016  45.572  39.102  1.00 31.03           C
ATOM   3890  O   ASN A 492      73.211  45.906  38.230  1.00 30.28           O
ATOM   3891  CB  ASN A 492      73.257  45.561  41.478  1.00 27.73           C
ATOM   3892  CG  ASN A 492      72.470  44.798  42.526  1.00 30.40           C
ATOM   3893  OD1 ASN A 492      71.796  43.804  42.213  1.00 25.95           O
ATOM   3894  ND2 ASN A 492      72.552  45.249  43.777  1.00 27.76           N
ATOM   3895  N   GLU A 493      75.288  45.938  39.088  1.00 34.62           N
ATOM   3896  CA  GLU A 493      75.840  46.730  38.007  1.00 31.37           C
ATOM   3897  C   GLU A 493      75.896  45.907  36.722  1.00 30.52           C
ATOM   3898  O   GLU A 493      75.614  46.423  35.644  1.00 31.86           O
ATOM   3899  CB  GLU A 493      77.236  47.238  38.389  1.00 32.63           C
ATOM   3900  CG  GLU A 493      77.828  48.156  37.372  1.00 38.13           C
ATOM   3901  CD  GLU A 493      79.185  48.668  37.791  1.00 45.61           C
ATOM   3902  OE1 GLU A 493      79.380  48.939  38.995  1.00 47.52           O
ATOM   3903  OE2 GLU A 493      80.046  48.799  36.905  1.00 47.04           O
ATOM   3904  N   GLY A 494      76.250  44.624  36.845  1.00 28.33           N
ATOM   3905  CA  GLY A 494      76.380  43.744  35.696  1.00 25.54           C
ATOM   3906  C   GLY A 494      75.065  43.416  34.997  1.00 33.09           C
ATOM   3907  O   GLY A 494      75.060  42.802  33.928  1.00 31.48           O
ATOM   3908  N   LEU A 495      73.944  43.818  35.593  1.00 33.51           N
ATOM   3909  CA  LEU A 495      72.629  43.617  34.972  1.00 32.25           C
ATOM   3910  C   LEU A 495      72.175  44.854  34.184  1.00 36.97           C
ATOM   3911  O   LEU A 495      71.163  44.810  33.479  1.00 36.75           O
ATOM   3912  CB  LEU A 495      71.581  43.278  36.036  1.00 27.33           C
ATOM   3913  CG  LEU A 495      71.729  41.986  36.839  1.00 33.21           C
ATOM   3914  CD1 LEU A 495      70.757  41.980  38.018  1.00 29.54           C
ATOM   3915  CD2 LEU A 495      71.498  40.756  35.951  1.00 33.20           C
ATOM   3916  N   LEU A 496      72.904  45.965  34.321  1.00 35.18           N
ATOM   3917  CA  LEU A 496      72.502  47.206  33.647  1.00 37.38           C
ATOM   3918  C   LEU A 496      72.796  47.160  32.150  1.00 36.10           C
ATOM   3919  O   LEU A 496      73.804  46.607  31.721  1.00 32.77           O
ATOM   3920  CB  LEU A 496      73.193  48.419  34.270  1.00 34.64           C
ATOM   3921  CG  LEU A 496      72.859  48.703  35.732  1.00 34.03           C
ATOM   3922  CD1 LEU A 496      73.741  49.838  36.269  1.00 32.00           C
ATOM   3923  CD2 LEU A 496      71.390  49.034  35.884  1.00 31.42           C
ATOM   3924  N   ARG A 497      71.894  47.734  31.360  1.00 37.82           N
ATOM   3925  CA  ARG A 497      72.051  47.767  29.913  1.00 40.15           C
ATOM   3926  C   ARG A 497      73.060  48.833  29.502  1.00 38.44           C
ATOM   3927  O   ARG A 497      73.161  49.867  30.156  1.00 38.13           O
ATOM   3928  CB  ARG A 497      70.712  48.033  29.244  1.00 37.53           C
ATOM   3929  CG  ARG A 497      69.626  47.099  29.692  1.00 45.43           C
ATOM   3930  CD  ARG A 497      68.283  47.517  29.127  1.00 42.46           C
ATOM   3931  NE  ARG A 497      67.238  46.603  29.559  1.00 44.34           N
ATOM   3932  CZ  ARG A 497      66.041  46.513  28.991  1.00 47.60           C
ATOM   3933  NH1 ARG A 497      65.736  47.275  27.951  1.00 46.89           N
ATOM   3934  NH2 ARG A 497      65.156  45.643  29.455  1.00 48.20           N
ATOM   3935  N   PRO A 498      73.802  48.590  28.411  1.00 37.95           N
ATOM   3936  CA  PRO A 498      73.774  47.392  27.563  1.00 39.21           C
ATOM   3937  C   PRO A 498      74.488  46.212  28.209  1.00 40.13           C
ATOM   3938  O   PRO A 498      75.629  46.368  28.680  1.00 42.57           O
ATOM   3939  CB  PRO A 498      74.525  47.841  26.310  1.00 44.18           C
ATOM   3940  CG  PRO A 498      75.532  48.821  26.842  1.00 37.74           C
ATOM   3941  CD  PRO A 498      74.823  49.553  27.958  1.00 39.49           C
ATOM   3942  N   THR A 499      73.833  45.054  28.216  1.00 40.86           N
ATOM   3943  CA  THR A 499      74.380  43.833  28.815  1.00 40.77           C
ATOM   3944  C   THR A 499      75.289  43.135  27.819  1.00 37.35           C
ATOM   3945  O   THR A 499      75.049  43.223  26.624  1.00 41.21           O
ATOM   3946  CB  THR A 499      73.243  42.874  29.258  1.00 35.23           C
ATOM   3947  OG1 THR A 499      72.520  42.432  28.105  1.00 34.35           O
ATOM   3948  CG2 THR A 499      72.280  43.597  30.188  1.00 37.45           C
ATOM   3949  N   PRO A 500      76.328  42.434  28.304  1.00 39.11           N
ATOM   3950  CA  PRO A 500      77.309  41.817  27.398  1.00 39.80           C
ATOM   3951  C   PRO A 500      76.773  40.567  26.697  1.00 42.15           C
ATOM   3952  O   PRO A 500      77.268  40.163  25.641  1.00 44.41           O
ATOM   3953  CB  PRO A 500      78.469  41.457  28.337  1.00 39.26           C
ATOM   3954  CG  PRO A 500      77.803  41.195  29.656  1.00 41.74           C
ATOM   3955  CD  PRO A 500      76.635  42.163  29.723  1.00 40.31           C
ATOM   3956  N   VAL A 501      75.785  39.936  27.317  1.00 41.62           N
ATOM   3957  CA  VAL A 501      75.041  38.840  26.707  1.00 39.37           C
ATOM   3958  C   VAL A 501      73.586  39.087  27.030  1.00 37.95           C
ATOM   3959  O   VAL A 501      73.277  40.003  27.784  1.00 38.63           O
ATOM   3960  CB  VAL A 501      75.466  37.445  27.233  1.00 40.25           C
ATOM   3961  CG1 VAL A 501      76.895  37.131  26.845  1.00 39.17           C
ATOM   3962  CG2 VAL A 501      75.290  37.373  28.741  1.00 39.15           C
ATOM   3963  N   SER A 502      72.695  38.284  26.464  1.00 37.13           N
ATOM   3964  CA  SER A 502      71.277  38.405  26.763  1.00 40.98           C
ATOM   3965  C   SER A 502      70.995  38.236  28.257  1.00 41.64           C
ATOM   3966  O   SER A 502      71.615  37.401  28.913  1.00 38.14           O
ATOM   3967  CB  SER A 502      70.483  37.373  25.972  1.00 43.38           C
ATOM   3968  OG  SER A 502      69.103  37.638  26.077  1.00 48.68           O
ATOM   3969  N   THR A 503      70.058  39.028  28.783  1.00 43.05           N
ATOM   3970  CA  THR A 503      69.638  38.952  30.191  1.00 41.52           C
ATOM   3971  C   THR A 503      69.290  37.531  30.590  1.00 36.51           C
ATOM   3972  O   THR A 503      69.510  37.110  31.734  1.00 34.90           O
ATOM   3973  CB  THR A 503      68.419  39.857  30.468  1.00 44.67           C
ATOM   3974  OG1 THR A 503      68.814  41.217  30.315  1.00 43.58           O
ATOM   3975  CG2 THR A 503      67.905  39.665  31.888  1.00 41.82           C
ATOM   3976  N   GLU A 504      68.786  36.780  29.623  1.00 35.90           N
ATOM   3977  CA  GLU A 504      68.475  35.376  29.833  1.00 37.64           C
ATOM   3978  C   GLU A 504      69.671  34.593  30.395  1.00 37.34           C
ATOM   3979  O   GLU A 504      69.509  33.612  31.125  1.00 32.28           O
ATOM   3980  CB  GLU A 504      68.006  34.751  28.524  1.00 38.43           C
ATOM   3981  CG  GLU A 504      67.459  33.363  28.707  1.00 44.85           C
ATOM   3982  CD  GLU A 504      67.122  32.678  27.405  1.00 43.59           C
ATOM   3983  OE1 GLU A 504      67.419  33.246  26.333  1.00 44.73           O
ATOM   3984  OE2 GLU A 504      66.552  31.568  27.466  1.00 44.30           O
ATOM   3985  N   PHE A 505      70.882  35.043  30.090  1.00 35.75           N
ATOM   3986  CA  PHE A 505      72.049  34.288  30.529  1.00 37.23           C
ATOM   3987  C   PHE A 505      72.695  34.906  31.750  1.00 32.78           C
ATOM   3988  O   PHE A 505      73.618  34.331  32.325  1.00 31.06           O
ATOM   3989  CB  PHE A 505      73.032  34.145  29.373  1.00 36.02           C
ATOM   3990  CG  PHE A 505      72.411  33.504  28.172  1.00 40.71           C
ATOM   3991  CD1 PHE A 505      71.947  32.195  28.240  1.00 38.85           C
ATOM   3992  CD2 PHE A 505      72.227  34.214  27.000  1.00 43.19           C
ATOM   3993  CE1 PHE A 505      71.336  31.605  27.149  1.00 40.77           C
ATOM   3994  CE2 PHE A 505      71.617  33.620  25.900  1.00 44.70           C
ATOM   3995  CZ  PHE A 505      71.169  32.317  25.980  1.00 42.67           C
ATOM   3996  N   LEU A 506      72.164  36.052  32.170  1.00 31.54           N
ATOM   3997  CA  LEU A 506      72.619  36.715  33.388  1.00 29.55           C
ATOM   3998  C   LEU A 506      71.840  36.245  34.603  1.00 30.83           C
ATOM   3999  O   LEU A 506      72.408  36.062  35.679  1.00 32.80           O
ATOM   4000  CB  LEU A 506      72.488  38.233  33.256  1.00 29.90           C
ATOM   4001  CG  LEU A 506      73.337  38.856  32.154  1.00 34.57           C
ATOM   4002  CD1 LEU A 506      73.248  40.351  32.228  1.00 32.45           C
ATOM   4003  CD2 LEU A 506      74.781  38.391  32.281  1.00 33.03           C
ATOM   4004  N   THR A 507      70.532  36.076  34.434  1.00 31.31           N
ATOM   4005  CA  THR A 507      69.647  35.713  35.540  1.00 30.08           C
ATOM   4006  C   THR A 507      70.055  34.409  36.250  1.00 30.06           C
ATOM   4007  O   THR A 507      69.948  34.339  37.479  1.00 28.44           O
ATOM   4008  CB  THR A 507      68.182  35.615  35.056  1.00 32.15           C
ATOM   4009  OG1 THR A 507      67.832  36.831  34.385  1.00 29.63           O
ATOM   4010  CG2 THR A 507      67.211  35.412  36.233  1.00 31.68           C
ATOM   4011  N   PRO A 508      70.545  33.385  35.512  1.00 29.24           N
ATOM   4012  CA  PRO A 508      70.958  32.219  36.313  1.00 29.96           C
ATOM   4013  C   PRO A 508      72.106  32.538  37.277  1.00 28.33           C
ATOM   4014  O   PRO A 508      72.178  31.969  38.366  1.00 26.60           O
ATOM   4015  CB  PRO A 508      71.397  31.200  35.256  1.00 28.73           C
ATOM   4016  CG  PRO A 508      70.607  31.560  34.048  1.00 32.27           C
ATOM   4017  CD  PRO A 508      70.528  33.074  34.069  1.00 28.42           C
ATOM   4018  N   ILE A 509      72.967  33.472  36.892  1.00 28.64           N
ATOM   4019  CA  ILE A 509      74.116  33.839  37.716  1.00 29.48           C
ATOM   4020  C   ILE A 509      73.634  34.603  38.943  1.00 29.00           C
ATOM   4021  O   ILE A 509      74.078  34.351  40.069  1.00 28.57           O
ATOM   4022  CB  ILE A 509      75.126  34.668  36.904  1.00 30.71           C
ATOM   4023  CG1 ILE A 509      75.799  33.769  35.865  1.00 28.09           C
ATOM   4024  CG2 ILE A 509      76.173  35.345  37.815  1.00 28.45           C
ATOM   4025  CD1 ILE A 509      76.528  34.540  34.785  1.00 33.69           C
ATOM   4026  N   LEU A 510      72.706  35.529  38.719  1.00 25.85           N
ATOM   4027  CA  LEU A 510      72.026  36.220  39.802  1.00 23.01           C
ATOM   4028  C   LEU A 510      71.327  35.241  40.750  1.00 27.98           C
ATOM   4029  O   LEU A 510      71.409  35.388  41.977  1.00 27.32           O
ATOM   4030  CB  LEU A 510      71.009  37.194  39.225  1.00 25.59           C
ATOM   4031  CG  LEU A 510      69.985  37.836  40.157  1.00 27.22           C
ATOM   4032  CD1 LEU A 510      70.675  38.758  41.150  1.00 28.95           C
ATOM   4033  CD2 LEU A 510      68.983  38.602  39.313  1.00 25.66           C
ATOM   4034  N   ASN A 511      70.652  34.237  40.181  1.00 23.68           N
ATOM   4035  CA  ASN A 511      69.887  33.287  40.989  1.00 27.32           C
ATOM   4036  C   ASN A 511      70.788  32.380  41.815  1.00 27.75           C
ATOM   4037  O   ASN A 511      70.415  31.974  42.921  1.00 25.86           O
ATOM   4038  CB  ASN A 511      68.941  32.460  40.100  1.00 24.05           C
ATOM   4039  CG  ASN A 511      67.698  33.248  39.683  1.00 27.25           C
ATOM   4040  OD1 ASN A 511      67.418  34.330  40.225  1.00 28.07           O
ATOM   4041  ND2 ASN A 511      66.966  32.732  38.699  1.00 27.41           N
ATOM   4042  N   LEU A 512      71.985  32.090  41.298  1.00 29.47           N
ATOM   4043  CA  LEU A 512      72.990  31.338  42.060  1.00 25.50           C
ATOM   4044  C   LEU A 512      73.384  32.086  43.334  1.00 24.52           C
ATOM   4045  O   LEU A 512      73.523  31.491  44.393  1.00 27.51           O
ATOM   4046  CB  LEU A 512      74.225  31.062  41.198  1.00 27.23           C
ATOM   4047  CG  LEU A 512      74.094  29.921  40.171  1.00 28.23           C
ATOM   4048  CD1 LEU A 512      75.343  29.880  39.294  1.00 28.96           C
ATOM   4049  CD2 LEU A 512      73.871  28.560  40.852  1.00 22.54           C
ATOM   4050  N   ALA A 513      73.532  33.397  43.236  1.00 25.69           N
ATOM   4051  CA  ALA A 513      73.863  34.209  44.403  1.00 29.48           C
ATOM   4052  C   ALA A 513      72.714  34.221  45.401  1.00 27.34           C
ATOM   4053  O   ALA A 513      72.929  34.138  46.608  1.00 28.27           O
ATOM   4054  CB  ALA A 513      74.228  35.647  43.984  1.00 26.44           C
ATOM   4055  N   ARG A 514      71.493  34.339  44.890  1.00 28.01           N
ATOM   4056  CA  ARG A 514      70.294  34.249  45.722  1.00 29.27           C
ATOM   4057  C   ARG A 514      70.225  32.928  46.481  1.00 27.89           C
ATOM   4058  O   ARG A 514      69.907  32.900  47.678  1.00 30.00           O
ATOM   4059  CB  ARG A 514      69.039  34.413  44.866  1.00 28.59           C
ATOM   4060  CG  ARG A 514      68.865  35.809  44.344  1.00 25.91           C
ATOM   4061  CD  ARG A 514      67.893  35.848  43.202  1.00 26.91           C
ATOM   4062  NE  ARG A 514      67.408  37.206  43.014  1.00 28.80           N
ATOM   4063  CZ  ARG A 514      66.713  37.621  41.963  1.00 27.81           C
ATOM   4064  NH1 ARG A 514      66.438  36.779  40.977  1.00 28.03           N
ATOM   4065  NH2 ARG A 514      66.315  38.887  41.893  1.00 26.01           N
ATOM   4066  N   ILE A 515      70.529  31.834  45.789  1.00 29.24           N
ATOM   4067  CA  ILE A 515      70.594  30.517  46.443  1.00 30.37           C
ATOM   4068  C   ILE A 515      71.542  30.548  47.646  1.00 30.86           C
ATOM   4069  O   ILE A 515      71.234  29.982  48.691  1.00 31.43           O
ATOM   4070  CB  ILE A 515      71.010  29.420  45.449  1.00 30.92           C
ATOM   4071  CG1 ILE A 515      69.821  29.085  44.545  1.00 27.48           C
ATOM   4072  CG2 ILE A 515      71.501  28.157  46.173  1.00 28.01           C
ATOM   4073  CD1 ILE A 515      70.224  28.438  43.237  1.00 29.45           C
ATOM   4074  N   VAL A 516      72.661  31.256  47.522  1.00 28.25           N
ATOM   4075  CA  VAL A 516      73.597  31.387  48.643  1.00 33.18           C
ATOM   4076  C   VAL A 516      72.959  32.091  49.842  1.00 33.32           C
ATOM   4077  O   VAL A 516      73.031  31.604  50.969  1.00 32.69           O
ATOM   4078  CB  VAL A 516      74.871  32.186  48.233  1.00 30.77           C
ATOM   4079  CG1 VAL A 516      75.673  32.586  49.456  1.00 27.72           C
ATOM   4080  CG2 VAL A 516      75.691  31.402  47.233  1.00 29.01           C
ATOM   4081  N   GLU A 517      72.360  33.251  49.587  1.00 28.33           N
ATOM   4082  CA  GLU A 517      71.735  34.052  50.639  1.00 33.97           C
ATOM   4083  C   GLU A 517      70.636  33.271  51.363  1.00 36.76           C
ATOM   4084  O   GLU A 517      70.484  33.364  52.579  1.00 38.05           O
ATOM   4085  CB  GLU A 517      71.157  35.341  50.050  1.00 31.68           C
ATOM   4086  CG  GLU A 517      72.211  36.250  49.402  1.00 35.48           C
ATOM   4087  CD  GLU A 517      73.010  37.062  50.412  1.00 37.71           C
ATOM   4088  OE1 GLU A 517      72.559  37.201  51.568  1.00 39.26           O
ATOM   4089  OE2 GLU A 517      74.093  37.571  50.043  1.00 38.58           O
ATOM   4090  N   VAL A 518      69.881  32.492  50.606  1.00 31.80           N
ATOM   4091  CA  VAL A 518      68.785  31.718  51.170  1.00 37.88           C
ATOM   4092  C   VAL A 518      69.288  30.496  51.959  1.00 42.70           C
ATOM   4093  O   VAL A 518      68.774  30.191  53.035  1.00 40.10           O
ATOM   4094  CB  VAL A 518      67.823  31.288  50.050  1.00 38.04           C
ATOM   4095  CG1 VAL A 518      66.881  30.179  50.512  1.00 36.06           C
ATOM   4096  CG2 VAL A 518      67.066  32.525  49.539  1.00 33.42           C
ATOM   4097  N   THR A 519      70.323  29.830  51.445  1.00 39.30           N
ATOM   4098  CA  THR A 519      70.837  28.601  52.056  1.00 40.50           C
ATOM   4099  C   THR A 519      71.596  28.832  53.376  1.00 40.98           C
ATOM   4100  O   THR A 519      71.572  27.998  54.287  1.00 41.56           O
ATOM   4101  CB  THR A 519      71.755  27.876  51.066  1.00 40.96           C
ATOM   4102  OG1 THR A 519      70.993  27.535  49.903  1.00 40.54           O
ATOM   4103  CG2 THR A 519      72.332  26.619  51.675  1.00 46.73           C
ATOM   4104  N   TYR A 520      72.259  29.972  53.479  1.00 39.82           N
ATOM   4105  CA  TYR A 520      73.036  30.288  54.669  1.00 49.01           C
ATOM   4106  C   TYR A 520      72.422  31.432  55.454  1.00 48.57           C
ATOM   4107  O   TYR A 520      73.141  32.212  56.066  1.00 56.06           O
ATOM   4108  CB  TYR A 520      74.471  30.654  54.296  1.00 43.82           C
ATOM   4109  CG  TYR A 520      75.249  29.574  53.579  1.00 45.83           C
ATOM   4110  CD1 TYR A 520      76.034  28.669  54.283  1.00 48.28           C
ATOM   4111  CD2 TYR A 520      75.222  29.476  52.193  1.00 43.79           C
ATOM   4112  CE1 TYR A 520      76.767  27.688  53.628  1.00 46.30           C
ATOM   4113  CE2 TYR A 520      75.948  28.506  51.532  1.00 44.96           C
ATOM   4114  CZ  TYR A 520      76.721  27.613  52.253  1.00 46.32           C
ATOM   4115  OH  TYR A 520      77.438  26.643  51.585  1.00 45.71           O
ATOM   4116  N   ILE A 521      71.099  31.543  55.427  1.00 49.47           N
ATOM   4117  CA  ILE A 521      70.419  32.623  56.139  1.00 57.45           C
ATOM   4118  C   ILE A 521      70.720  32.492  57.644  1.00 66.25           C
ATOM   4119  O   ILE A 521      70.566  31.422  58.235  1.00 65.59           O
ATOM   4120  CB  ILE A 521      68.877  32.634  55.829  1.00 55.73           C
ATOM   4121  CG1 ILE A 521      68.225  33.930  56.315  1.00 57.09           C
ATOM   4122  CG2 ILE A 521      68.158  31.376  56.362  1.00 46.14           C
ATOM   4123  CD1 ILE A 521      66.855  34.195  55.718  1.00 47.84           C
ATOM   4124  O   HIS A 522      72.835  32.123  61.152  1.00 91.10           O
ATOM   4125  N   HIS A 522      71.219  33.579  58.232  1.00 72.75           N
ATOM   4126  CA  HIS A 522      71.711  33.600  59.619  1.00 79.21           C
ATOM   4127  C   HIS A 522      72.745  32.511  59.986  1.00 82.53           C
ATOM   4128  CB  HIS A 522      70.537  33.511  60.600  1.00 88.61           C
ATOM   4129  CG  HIS A 522      69.346  34.328  60.204  1.00 91.58           C
ATOM   4130  ND1 HIS A 522      69.434  35.663  59.868  1.00 95.50           N
ATOM   4131  CD2 HIS A 522      68.032  34.006  60.118  1.00 94.87           C
ATOM   4132  CE1 HIS A 522      68.230  36.123  59.576  1.00 92.30           C
ATOM   4133  NE2 HIS A 522      67.361  35.138  59.720  1.00 92.83           N
ATOM   4134  O   ASN A 523      75.888  29.502  60.253  1.00 79.07           O
ATOM   4135  N   ASN A 523      73.462  31.988  58.987  1.00 75.82           N
ATOM   4136  CA  ASN A 523      74.773  31.328  59.161  1.00 72.75           C
ATOM   4137  C   ASN A 523      74.910  29.846  59.574  1.00 79.83           C
ATOM   4138  CB  ASN A 523      75.596  32.138  60.168  1.00 72.36           C
ATOM   4139  CG  ASN A 523      76.185  33.382  59.559  1.00 77.33           C
ATOM   4140  OD1 ASN A 523      77.254  33.336  58.948  1.00 67.26           O
ATOM   4141  ND2 ASN A 523      75.482  34.504  59.705  1.00 80.53           N
ATOM   4142  O   LEU A 524      73.379  27.211  57.100  1.00 70.43           O
ATOM   4143  N   LEU A 524      74.006  28.957  59.162  1.00 76.00           N
ATOM   4144  CA  LEU A 524      74.334  27.521  59.251  1.00 77.34           C
ATOM   4145  C   LEU A 524      74.265  26.876  57.876  1.00 70.51           C
ATOM   4146  CB  LEU A 524      73.408  26.774  60.204  1.00 84.69           C
ATOM   4147  CG  LEU A 524      72.809  27.337  61.493  1.00 89.06           C
ATOM   4148  CD1 LEU A 524      72.042  26.216  62.173  1.00 88.74           C
ATOM   4149  CD2 LEU A 524      73.864  27.927  62.417  1.00 85.13           C
ATOM   4150  O   ASP A 525      73.450  23.669  56.819  1.00 73.54           O
ATOM   4151  N   ASP A 525      75.173  25.950  57.568  1.00 71.92           N
ATOM   4152  CA  ASP A 525      75.127  25.312  56.252  1.00 70.86           C
ATOM   4153  C   ASP A 525      73.794  24.585  56.068  1.00 70.57           C
ATOM   4154  CB  ASP A 525      76.298  24.344  56.042  1.00 67.29           C
ATOM   4155  CG  ASP A 525      76.398  23.838  54.586  1.00 73.55           C
ATOM   4156  OD1 ASP A 525      75.360  23.732  53.880  1.00 72.32           O
ATOM   4157  OD2 ASP A 525      77.532  23.526  54.137  1.00 72.83           O
ATOM   4158  O   GLY A 526      70.690  22.587  53.817  1.00 69.00           O
ATOM   4159  N   GLY A 526      73.062  24.997  55.042  1.00 65.34           N
ATOM   4160  CA  GLY A 526      71.731  24.485  54.805  1.00 65.60           C
ATOM   4161  C   GLY A 526      71.667  23.332  53.830  1.00 65.65           C
ATOM   4162  O   TYR A 527      72.572  19.672  52.530  1.00 70.60           O
ATOM   4163  N   TYR A 527      72.683  23.173  52.992  1.00 70.31           N
ATOM   4164  CA  TYR A 527      72.667  22.031  52.080  1.00 71.89           C
ATOM   4165  C   TYR A 527      73.111  20.753  52.792  1.00 74.69           C
ATOM   4166  CB  TYR A 527      73.547  22.283  50.848  1.00 73.57           C
ATOM   4167  CG  TYR A 527      73.691  21.062  49.948  1.00 73.21           C
ATOM   4168  CD1 TYR A 527      72.701  20.726  49.030  1.00 64.49           C
ATOM   4169  CD2 TYR A 527      74.812  20.243  50.028  1.00 71.99           C
ATOM   4170  CE1 TYR A 527      72.829  19.614  48.215  1.00 58.41           C
ATOM   4171  CE2 TYR A 527      74.944  19.126  49.217  1.00 68.98           C
ATOM   4172  CZ  TYR A 527      73.952  18.820  48.312  1.00 62.88           C
ATOM   4173  OH  TYR A 527      74.087  17.711  47.508  1.00 62.10           O
ATOM   4174  N   THR A 528      74.087  20.879  53.690  1.00 74.98           N
ATOM   4175  CA  THR A 528      74.585  19.722  54.420  1.00 79.03           C
ATOM   4176  C   THR A 528      73.640  19.433  55.595  1.00 78.42           C
ATOM   4177  O   THR A 528      73.449  18.285  55.988  1.00 80.07           O
ATOM   4178  CB  THR A 528      76.032  19.939  54.933  1.00 78.95           C
ATOM   4179  OG1 THR A 528      76.773  20.733  53.996  1.00 81.91           O
ATOM   4180  CG2 THR A 528      76.737  18.599  55.067  1.00 75.44           C
ATOM   4181  N   HIS A 529      73.025  20.487  56.127  1.00 78.85           N
ATOM   4182  CA  HIS A 529      72.044  20.344  57.210  1.00 75.77           C
ATOM   4183  C   HIS A 529      70.709  21.007  56.881  1.00 70.98           C
ATOM   4184  O   HIS A 529      70.346  22.044  57.452  1.00 64.44           O
ATOM   4185  CB  HIS A 529      72.616  20.901  58.508  1.00 73.94           C
ATOM   4186  CG  HIS A 529      73.846  20.184  58.951  1.00 86.04           C
ATOM   4187  ND1 HIS A 529      75.091  20.421  58.381  1.00 87.14           N
ATOM   4188  CD2 HIS A 529      74.037  19.207  59.861  1.00 89.09           C
ATOM   4189  CE1 HIS A 529      75.984  19.614  58.936  1.00 92.20           C
ATOM   4190  NE2 HIS A 529      75.366  18.875  59.841  1.00 96.21           N
ATOM   4191  N   PRO A 530      69.953  20.365  55.981  1.00 71.01           N
ATOM   4192  CA  PRO A 530      68.768  20.933  55.333  1.00 67.15           C
ATOM   4193  C   PRO A 530      67.511  20.973  56.189  1.00 62.07           C
ATOM   4194  O   PRO A 530      66.521  21.556  55.754  1.00 60.10           O
ATOM   4195  CB  PRO A 530      68.564  20.000  54.149  1.00 64.46           C
ATOM   4196  CG  PRO A 530      69.037  18.683  54.649  1.00 63.15           C
ATOM   4197  CD  PRO A 530      70.211  18.980  55.537  1.00 68.76           C
ATOM   4198  N   GLU A 531      67.542  20.367  57.368  1.00 66.91           N
ATOM   4199  CA  GLU A 531      66.349  20.291  58.205  1.00 66.79           C
ATOM   4200  C   GLU A 531      65.979  21.682  58.711  1.00 67.13           C
ATOM   4201  O   GLU A 531      64.799  22.019  58.845  1.00 63.42           O
ATOM   4202  CB  GLU A 531      66.574  19.326  59.372  1.00 65.54           C
ATOM   4203  CG  GLU A 531      67.473  18.129  59.028  1.00 75.43           C
ATOM   4204  CD  GLU A 531      68.977  18.431  59.175  1.00 76.71           C
ATOM   4205  OE1 GLU A 531      69.347  19.246  60.044  1.00 75.36           O
ATOM   4206  OE2 GLU A 531      69.784  17.848  58.418  1.00 78.16           O
ATOM   4207  O   LYS A 532      65.243  25.366  58.408  1.00 65.61           O
ATOM   4208  N   LYS A 532      67.000  22.491  58.969  1.00 67.15           N
ATOM   4209  CA  LYS A 532      66.793  23.854  59.439  1.00 71.62           C
ATOM   4210  C   LYS A 532      66.324  24.784  58.326  1.00 67.18           C
ATOM   4211  CB  LYS A 532      68.080  24.406  60.059  1.00 73.76           C
ATOM   4212  CG  LYS A 532      69.105  23.343  60.437  1.00 78.22           C
ATOM   4213  CD  LYS A 532      68.972  22.955  61.912  1.00 83.02           C
ATOM   4214  CE  LYS A 532      70.042  21.943  62.350  1.00 85.98           C
ATOM   4215  NZ  LYS A 532      69.884  20.575  61.771  1.00 83.77           N
ATOM   4216  N   VAL A 533      67.136  24.901  57.278  1.00 65.10           N
ATOM   4217  CA  VAL A 533      66.934  25.934  56.263  1.00 59.49           C
ATOM   4218  C   VAL A 533      66.095  25.479  55.069  1.00 49.64           C
ATOM   4219  O   VAL A 533      65.104  26.118  54.730  1.00 49.54           O
ATOM   4220  CB  VAL A 533      68.294  26.452  55.733  1.00 58.18           C
ATOM   4221  CG1 VAL A 533      68.162  27.885  55.243  1.00 54.05           C
ATOM   4222  CG2 VAL A 533      69.358  26.356  56.816  1.00 63.55           C
ATOM   4223  N   LEU A 534      66.487  24.372  54.442  1.00 50.21           N
ATOM   4224  CA  LEU A 534      65.926  23.991  53.147  1.00 45.21           C
ATOM   4225  C   LEU A 534      64.626  23.187  53.219  1.00 44.33           C
ATOM   4226  O   LEU A 534      63.837  23.193  52.268  1.00 39.18           O
ATOM   4227  CB  LEU A 534      66.958  23.197  52.344  1.00 42.65           C
ATOM   4228  CG  LEU A 534      68.180  23.964  51.826  1.00 49.07           C
ATOM   4229  CD1 LEU A 534      68.873  23.173  50.726  1.00 44.15           C
ATOM   4230  CD2 LEU A 534      67.798  25.365  51.327  1.00 43.24           C
ATOM   4231  N   LYS A 535      64.410  22.493  54.330  1.00 44.08           N
ATOM   4232  CA  LYS A 535      63.272  21.594  54.457  1.00 40.80           C
ATOM   4233  C   LYS A 535      61.919  22.328  54.293  1.00 39.92           C
ATOM   4234  O   LYS A 535      61.098  21.899  53.483  1.00 38.09           O
ATOM   4235  CB  LYS A 535      63.344  20.845  55.795  1.00 45.90           C
ATOM   4236  CG  LYS A 535      62.251  19.800  55.997  1.00 48.21           C
ATOM   4237  CD  LYS A 535      62.213  19.320  57.447  1.00 49.26           C
ATOM   4238  CE  LYS A 535      61.041  18.371  57.705  1.00 50.47           C
ATOM   4239  NZ  LYS A 535      60.674  18.333  59.157  1.00 55.56           N
ATOM   4240  N   PRO A 536      61.691  23.440  55.028  1.00 35.92           N
ATOM   4241  CA  PRO A 536      60.438  24.176  54.808  1.00 36.49           C
ATOM   4242  C   PRO A 536      60.218  24.636  53.360  1.00 41.41           C
ATOM   4243  O   PRO A 536      59.074  24.611  52.889  1.00 35.14           O
ATOM   4244  CB  PRO A 536      60.582  25.396  55.725  1.00 40.39           C
ATOM   4245  CG  PRO A 536      61.506  24.959  56.780  1.00 47.90           C
ATOM   4246  CD  PRO A 536      62.488  24.057  56.104  1.00 40.92           C
ATOM   4247  N   HIS A 537      61.284  25.053  52.672  1.00 36.02           N
ATOM   4248  CA  HIS A 537      61.153  25.503  51.295  1.00 31.98           C
ATOM   4249  C   HIS A 537      60.800  24.370  50.353  1.00 33.85           C
ATOM   4250  O   HIS A 537      59.987  24.542  49.445  1.00 34.85           O
ATOM   4251  CB  HIS A 537      62.434  26.178  50.827  1.00 34.12           C
ATOM   4252  CG  HIS A 537      62.784  27.403  51.611  1.00 37.26           C
ATOM   4253  ND1 HIS A 537      64.075  27.706  51.992  1.00 40.57           N
ATOM   4254  CD2 HIS A 537      62.006  28.396  52.096  1.00 31.97           C
ATOM   4255  CE1 HIS A 537      64.078  28.834  52.675  1.00 35.06           C
ATOM   4256  NE2 HIS A 537      62.835  29.273  52.754  1.00 39.56           N
ATOM   4257  N   ILE A 538      61.431  23.218  50.554  1.00 33.18           N
ATOM   4258  CA  ILE A 538      61.172  22.054  49.730  1.00 33.27           C
ATOM   4259  C   ILE A 538      59.726  21.595  49.921  1.00 33.76           C
ATOM   4260  O   ILE A 538      59.039  21.242  48.955  1.00 32.21           O
ATOM   4261  CB  ILE A 538      62.145  20.910  50.061  1.00 36.49           C
ATOM   4262  CG1 ILE A 538      63.557  21.288  49.600  1.00 35.86           C
ATOM   4263  CG2 ILE A 538      61.687  19.603  49.406  1.00 32.89           C
ATOM   4264  CD1 ILE A 538      64.606  20.233  49.857  1.00 35.50           C
ATOM   4265  N   ILE A 539      59.260  21.629  51.166  1.00 34.02           N
ATOM   4266  CA  ILE A 539      57.868  21.292  51.459  1.00 35.87           C
ATOM   4267  C   ILE A 539      56.936  22.278  50.764  1.00 36.47           C
ATOM   4268  O   ILE A 539      56.003  21.865  50.076  1.00 34.22           O
ATOM   4269  CB  ILE A 539      57.586  21.259  52.993  1.00 38.42           C
ATOM   4270  CG1 ILE A 539      58.180  19.981  53.611  1.00 39.85           C
ATOM   4271  CG2 ILE A 539      56.072  21.284  53.279  1.00 36.04           C
ATOM   4272  CD1 ILE A 539      58.267  20.011  55.125  1.00 40.63           C
ATOM   4273  N   ASN A 540      57.218  23.576  50.904  1.00 33.69           N
ATOM   4274  CA  ASN A 540      56.358  24.612  50.327  1.00 35.72           C
ATOM   4275  C   ASN A 540      56.373  24.635  48.804  1.00 34.78           C
ATOM   4276  O   ASN A 540      55.403  25.074  48.174  1.00 31.42           O
ATOM   4277  CB  ASN A 540      56.756  25.995  50.853  1.00 38.50           C
ATOM   4278  CG  ASN A 540      56.330  26.219  52.286  1.00 39.15           C
ATOM   4279  OD1 ASN A 540      55.480  25.499  52.806  1.00 44.68           O
ATOM   4280  ND2 ASN A 540      56.917  27.215  52.935  1.00 35.34           N
ATOM   4281  N   LEU A 541      57.463  24.162  48.207  1.00 29.60           N
ATOM   4282  CA  LEU A 541      57.613  24.246  46.755  1.00 32.37           C
ATOM   4283  C   LEU A 541      57.296  22.927  46.039  1.00 30.12           C
ATOM   4284  O   LEU A 541      56.827  22.928  44.898  1.00 31.11           O
ATOM   4285  CB  LEU A 541      59.038  24.704  46.382  1.00 33.47           C
ATOM   4286  CG  LEU A 541      59.485  26.147  46.679  1.00 33.04           C
ATOM   4287  CD1 LEU A 541      60.808  26.498  45.982  1.00 30.82           C
ATOM   4288  CD2 LEU A 541      58.421  27.143  46.323  1.00 31.60           C
ATOM   4289  N   LEU A 542      57.547  21.807  46.708  1.00 31.55           N
ATOM   4290  CA  LEU A 542      57.500  20.504  46.043  1.00 35.19           C
ATOM   4291  C   LEU A 542      56.554  19.481  46.695  1.00 36.62           C
ATOM   4292  O   LEU A 542      56.311  18.409  46.130  1.00 38.14           O
ATOM   4293  CB  LEU A 542      58.925  19.927  45.967  1.00 33.22           C
ATOM   4294  CG  LEU A 542      59.932  20.836  45.258  1.00 34.97           C
ATOM   4295  CD1 LEU A 542      61.376  20.350  45.422  1.00 34.15           C
ATOM   4296  CD2 LEU A 542      59.550  20.967  43.783  1.00 36.45           C
ATOM   4297  N   VAL A 543      56.015  19.802  47.869  1.00 34.99           N
ATOM   4298  CA  VAL A 543      55.052  18.909  48.508  1.00 38.16           C
ATOM   4299  C   VAL A 543      53.640  19.509  48.527  1.00 37.16           C
ATOM   4300  O   VAL A 543      52.754  19.027  47.827  1.00 35.09           O
ATOM   4301  CB  VAL A 543      55.472  18.550  49.946  1.00 39.49           C
ATOM   4302  CG1 VAL A 543      54.457  17.570  50.563  1.00 36.71           C
ATOM   4303  CG2 VAL A 543      56.889  17.942  49.954  1.00 36.40           C
ATOM   4304  N   ASP A 544      53.444  20.567  49.312  1.00 35.08           N
ATOM   4305  CA  ASP A 544      52.129  21.186  49.485  1.00 36.15           C
ATOM   4306  C   ASP A 544      51.775  22.151  48.354  1.00 40.25           C
ATOM   4307  O   ASP A 544      52.488  23.155  48.110  1.00 38.19           O
ATOM   4308  CB  ASP A 544      52.057  21.929  50.830  1.00 33.18           C
ATOM   4309  CG  ASP A 544      52.219  21.004  52.032  1.00 41.52           C
ATOM   4310  OD1 ASP A 544      52.074  19.762  51.882  1.00 51.70           O
ATOM   4311  OD2 ASP A 544      52.487  21.515  53.142  1.00 39.99           O
ATOM   4312  N   SER A 545      50.659  21.867  47.681  1.00 34.87           N
ATOM   4313  CA  SER A 545      50.109  22.794  46.688  1.00 36.63           C
ATOM   4314  C   SER A 545      49.497  24.020  47.381  1.00 37.16           C
ATOM   4315  O   SER A 545      49.306  24.015  48.598  1.00 37.88           O
ATOM   4316  CB  SER A 545      49.059  22.103  45.823  1.00 38.61           C
ATOM   4317  OG  SER A 545      47.963  21.691  46.620  1.00 41.95           O
ATOM   4318  N   ILE A 546      49.210  25.078  46.629  1.00 33.36           N
ATOM   4319  CA  ILE A 546      48.599  26.249  47.245  1.00 41.08           C
ATOM   4320  C   ILE A 546      47.089  26.018  47.326  1.00 41.75           C
ATOM   4321  O   ILE A 546      46.447  25.674  46.330  1.00 40.85           O
ATOM   4322  CB  ILE A 546      48.899  27.542  46.471  1.00 35.92           C
ATOM   4323  CG1 ILE A 546      50.408  27.775  46.393  1.00 41.42           C
ATOM   4324  CG2 ILE A 546      48.235  28.734  47.153  1.00 37.03           C
ATOM   4325  CD1 ILE A 546      50.790  29.140  45.824  1.00 35.57           C
ATOM   4326  N   LYS A 547      46.513  26.173  48.509  1.00 44.24           N
ATOM   4327  CA  LYS A 547      45.101  25.851  48.629  1.00 49.76           C
ATOM   4328  C   LYS A 547      44.289  26.928  47.919  1.00 44.86           C
ATOM   4329  O   LYS A 547      44.444  28.131  48.168  1.00 41.29           O
ATOM   4330  CB  LYS A 547      44.673  25.698  50.093  1.00 55.44           C
ATOM   4331  CG  LYS A 547      43.990  24.356  50.361  1.00 61.70           C
ATOM   4332  CD  LYS A 547      43.277  24.319  51.710  1.00 72.86           C
ATOM   4333  CE  LYS A 547      42.094  25.300  51.751  1.00 69.91           C
ATOM   4334  NZ  LYS A 547      40.913  24.866  50.930  1.00 72.88           N
ATOM   4335  N   ILE A 548      43.466  26.472  46.984  1.00 45.48           N
ATOM   4336  CA  ILE A 548      42.645  27.352  46.173  1.00 50.29           C
ATOM   4337  C   ILE A 548      41.307  27.630  46.862  1.00 55.77           C
ATOM   4338  O   ILE A 548      40.647  26.734  47.408  1.00 53.82           O
ATOM   4339  CB  ILE A 548      42.421  26.745  44.779  1.00 48.62           C
ATOM   4340  CG1 ILE A 548      43.716  26.815  43.972  1.00 47.21           C
ATOM   4341  CG2 ILE A 548      41.323  27.477  44.045  1.00 53.58           C
ATOM   4342  CD1 ILE A 548      43.743  25.862  42.788  1.00 48.13           C
ATOM   4343  OXT ILE A 548      40.865  28.777  46.905  1.00 57.77           O1-
TER
HETATM 4344 MG    MG M   1      83.082  25.219  53.349  1.00 56.13          Mg
HETATM 4345 MG    MG M   2      84.031  20.162  50.832  1.00 69.02          Mg
HETATM 4346 MG    MG M   3      86.147  19.237  49.598  1.00 59.69          Mg
TER
HETATM 4347  O   HOH S   1      55.270  57.413  50.479  1.00 34.82           O
HETATM 4348  O   HOH S   2      76.658  52.702  46.191  1.00 39.75           O
HETATM 4349  O   HOH S   3      83.567  26.404  39.838  1.00 26.80           O
HETATM 4350  O   HOH S   4      64.000  33.214  49.375  1.00 22.49           O
HETATM 4351  O   HOH S   5      55.680  26.306  41.092  1.00 29.02           O
HETATM 4352  O   HOH S   6      79.819  41.154  34.002  1.00 33.17           O
HETATM 4353  O   HOH S   7      71.128  48.635  40.008  1.00 29.60           O
HETATM 4354  O   HOH S   8      58.662  32.860  40.965  1.00 27.68           O
HETATM 4355  O   HOH S   9      57.238  46.787  46.419  1.00 40.63           O
HETATM 4356  O   HOH S  10      60.717  48.930  46.105  1.00 31.41           O
HETATM 4357  O   HOH S  11      71.694  51.764  52.038  1.00 35.41           O
HETATM 4358  O   HOH S  12      64.658  43.820  47.676  1.00 27.62           O
HETATM 4359  O   HOH S  13      53.826  30.079  38.785  1.00 32.37           O
HETATM 4360  O   HOH S  14      58.929  29.081  30.302  1.00 49.93           O
HETATM 4361  O   HOH S  15      74.468  40.193  51.595  1.00 63.46           O
HETATM 4362  O   HOH S  16      59.089  43.033  41.903  1.00 32.16           O
HETATM 4363  O   HOH S  17      61.520  43.804  39.247  1.00 31.68           O
HETATM 4364  O   HOH S  18      44.657  43.270  60.720  1.00 34.61           O
HETATM 4365  O   HOH S  19      58.018  40.904  52.070  1.00 29.26           O
HETATM 4366  O   HOH S  20      71.841  57.922  51.736  1.00 45.65           O
HETATM 4367  O   HOH S  21      64.726  32.465  35.054  1.00 32.04           O
HETATM 4368  O   HOH S  22      60.674  40.716  50.807  1.00 35.89           O
HETATM 4369  O   HOH S  23      50.547  21.058  42.253  1.00 32.76           O
HETATM 4370  O   HOH S  24      51.545  19.104  45.206  1.00 44.62           O
HETATM 4371  O   HOH S  25      55.533  15.840  46.224  1.00 36.81           O
HETATM 4372  O   HOH S  26      52.262  31.888  40.396  1.00 30.26           O
HETATM 4373  O   HOH S  27      65.554  23.543  29.065  1.00 40.96           O
HETATM 4374  O   HOH S  28      62.979  30.019  41.813  1.00 24.37           O
HETATM 4375  O   HOH S  29      55.896  40.018  50.419  1.00 33.21           O
HETATM 4376  O   HOH S  30      52.414  54.890  57.493  1.00 41.08           O
HETATM 4377  O   HOH S  31      85.210  25.396  37.835  1.00 30.11           O
HETATM 4378  O   HOH S  32      70.426  46.537  38.541  1.00 24.67           O
HETATM 4379  O   HOH S  33      62.570  43.792  30.815  1.00 45.17           O
HETATM 4380  O   HOH S  34      57.064  24.831  42.431  1.00 31.84           O
HETATM 4381  O   HOH S  35      57.455  37.457  45.486  1.00 30.18           O
HETATM 4382  O   HOH S  36      57.849  30.370  51.017  1.00 33.83           O
HETATM 4383  O   HOH S  37      89.768  29.609  41.719  1.00 37.04           O
HETATM 4384  O   HOH S  38      68.103  45.271  57.391  1.00 37.43           O
HETATM 4385  O   HOH S  39      72.427  48.985  50.976  1.00 38.11           O
HETATM 4386  O   HOH S  40      78.551  56.346  44.221  1.00 41.93           O
HETATM 4387  O   HOH S  41      83.709   7.665  44.254  1.00 54.15           O
HETATM 4388  O   HOH S  42      50.483  44.136  51.985  1.00 35.18           O
HETATM 4389  O   HOH S  43      64.659  32.886  52.477  1.00 31.89           O
HETATM 4390  O   HOH S  44      67.387  42.080  34.468  1.00 40.34           O
HETATM 4391  O   HOH S  45      73.638   9.040  33.517  1.00 42.30           O
HETATM 4392  O   HOH S  46      64.252  31.145  39.397  1.00 32.85           O
HETATM 4393  O   HOH S  47      48.175  42.860  62.715  1.00 40.20           O
HETATM 4394  O   HOH S  48      75.088  58.304  44.097  1.00 42.81           O
HETATM 4395  O   HOH S  49      53.477  27.968  32.184  1.00 39.26           O
HETATM 4396  O   HOH S  50      67.407  31.661  43.078  1.00 30.51           O
HETATM 4397  O   HOH S  51      59.382  34.996  39.300  1.00 31.74           O
HETATM 4398  O   HOH S  52      65.159  64.187  44.191  1.00 45.79           O
HETATM 4399  O   HOH S  53      83.264  41.506  32.802  1.00 41.65           O
HETATM 4400  O   HOH S  54      94.947  26.725  42.757  1.00 39.59           O
HETATM 4401  O   HOH S  55      49.904  36.303  56.638  1.00 42.14           O
HETATM 4402  O   HOH S  56      62.040  35.333  38.171  1.00 38.06           O
HETATM 4403  O   HOH S  57      86.147  29.938  56.985  1.00 44.06           O
HETATM 4404  O   HOH S  58      66.899  32.623  32.487  1.00 40.45           O
HETATM 4405  O   HOH S  59      52.388  54.803  54.010  1.00 35.61           O
HETATM 4406  O   HOH S  60      47.504  44.838  55.022  1.00 36.01           O
HETATM 4407  O   HOH S  61      53.038  51.623  63.410  1.00 39.92           O
HETATM 4408  O   HOH S  62      53.230  12.090  35.847  1.00 57.42           O
HETATM 4409  O   HOH S  63      57.194  39.164  47.707  1.00 33.04           O
HETATM 4410  O   HOH S  64      72.270  56.163  36.856  1.00 40.24           O
HETATM 4411  O   HOH S  65      69.670  14.958  32.007  1.00 46.51           O
HETATM 4412  O   HOH S  66      38.891  35.222  45.080  1.00 32.81           O
HETATM 4413  O   HOH S  67      45.325  54.685  37.699  1.00 53.00           O
HETATM 4414  O   HOH S  68      96.450  38.372  50.777  1.00 40.61           O
HETATM 4415  O   HOH S  69      61.875  33.503  52.519  1.00 34.23           O
HETATM 4416  O   HOH S  70      97.102  33.543  55.517  1.00 43.07           O
HETATM 4417  O   HOH S  71      91.177  25.921  48.742  1.00 33.80           O
HETATM 4418  O   HOH S  72      82.382  22.047  46.864  1.00 38.32           O
HETATM 4419  O   HOH S  73      66.724  43.490  58.941  1.00 36.30           O
HETATM 4420  O   HOH S  74      59.605  40.077  35.172  1.00 37.92           O
HETATM 4421  O   HOH S  75      72.563  51.662  55.535  1.00 37.45           O
HETATM 4422  O   HOH S  76      71.368  23.009  31.737  1.00 37.40           O
HETATM 4423  O   HOH S  77      65.548  10.612  49.259  1.00 52.66           O
HETATM 4424  O   HOH S  78      82.396  28.872  31.390  1.00 34.66           O
HETATM 4425  O   HOH S  79      87.422  26.401  52.031  1.00 47.98           O
HETATM 4426  O   HOH S  80      68.013  35.147  24.871  1.00 42.46           O
HETATM 4427  O   HOH S  81      64.134  33.417  37.884  1.00 30.18           O
HETATM 4428  O   HOH S  82      67.171  31.881  34.841  1.00 35.93           O
HETATM 4429  O   HOH S  83      57.723  35.508  37.049  1.00 39.17           O
HETATM 4430  O   HOH S  84      65.125  40.515  39.727  1.00 39.37           O
HETATM 4431  O   HOH S  85      68.182  48.367  63.338  1.00 49.58           O
HETATM 4432  O   HOH S  86      62.792  41.556  38.132  1.00 36.75           O
HETATM 4433  O   HOH S  87      59.827  39.148  49.391  1.00 36.85           O
HETATM 4434  O   HOH S  88      81.242  46.082  39.274  1.00 42.36           O
HETATM 4435  O   HOH S  89      82.343  28.664  29.180  1.00 43.17           O
HETATM 4436  O   HOH S  90      61.241  33.578  31.844  1.00 44.01           O
HETATM 4437  O   HOH S  91      69.545  66.815  49.884  1.00 57.92           O
HETATM 4438  O   HOH S  92      71.890  35.477  53.922  1.00 47.76           O
HETATM 4439  O   HOH S  93      38.415  32.192  36.047  1.00 43.09           O
HETATM 4440  O   HOH S  94      40.011  30.912  42.872  1.00 44.11           O
HETATM 4441  O   HOH S  95      67.518  13.932  49.690  1.00 42.60           O
HETATM 4442  O   HOH S  96      67.237  58.655  34.832  1.00 44.77           O
HETATM 4443  O   HOH S  97      40.011  33.765  47.488  1.00 47.60           O
HETATM 4444  O   HOH S  98      50.865  18.145  42.478  1.00 39.66           O
HETATM 4445  O   HOH S  99      83.890  41.309  46.173  1.00 40.07           O
HETATM 4446  O   HOH S 100      62.100  10.244  46.914  1.00 46.89           O
HETATM 4447  O   HOH S 101      63.792  50.187  66.070  1.00 45.01           O
HETATM 4448  O   HOH S 102      41.736  32.021  44.261  1.00 39.89           O
HETATM 4449  O   HOH S 103      66.903  22.629  25.209  1.00 53.18           O
HETATM 4450  O   HOH S 104      79.749  44.464  36.576  1.00 35.66           O
HETATM 4451  O   HOH S 105      55.935  14.354  44.335  1.00 41.40           O
HETATM 4452  O   HOH S 106      77.570  22.242  44.250  1.00 42.08           O
HETATM 4453  O   HOH S 107      69.257  42.941  32.500  1.00 41.00           O
HETATM 4454  O   HOH S 108      80.853  29.557  61.804  1.00 55.43           O
HETATM 4455  O   HOH S 109      59.663  44.508  65.190  1.00 47.81           O
HETATM 4456  O   HOH S 110      92.936  14.997  52.259  1.00 57.19           O
HETATM 4457  O   HOH S 111      39.052  25.714  41.116  1.00 52.84           O
HETATM 4458  O   HOH S 112      66.094  10.579  46.889  1.00 48.72           O
HETATM 4459  O   HOH S 113      50.634  28.449  32.696  1.00 41.80           O
HETATM 4460  O   HOH S 114      92.477  22.941  53.041  1.00 44.23           O
HETATM 4461  O   HOH S 115      79.823  44.083  34.337  1.00 47.98           O
HETATM 4462  O   HOH S 116      73.631  -0.797  43.425  1.00 62.58           O
HETATM 4463  O   HOH S 117      75.242   8.652  34.397  1.00 45.01           O
HETATM 4464  O   HOH S 118      62.006  37.455  42.700  1.00 39.06           O
HETATM 4465  O   HOH S 119      63.564  40.830  35.758  1.00 47.23           O
HETATM 4466  O   HOH S 120      68.561  43.540  55.262  1.00 45.20           O
HETATM 4467  O   HOH S 121      56.153  37.198  58.168  1.00 37.31           O
HETATM 4468  O   HOH S 122      36.370  37.934  46.743  1.00 42.51           O
HETATM 4469  O   HOH S 123      48.293  16.901  41.596  1.00 44.09           O
HETATM 4470  O   HOH S 124      75.663  44.854  31.774  1.00 43.50           O
HETATM 4471  O   HOH S 125      74.042  55.608  39.252  1.00 45.09           O
HETATM 4472  O   HOH S 126      47.461  48.627  40.400  1.00 47.95           O
HETATM 4473  O   HOH S 127      91.758  27.923  39.007  1.00 52.50           O
HETATM 4474  O   HOH S 128      52.842  52.842  61.710  1.00 43.26           O
HETATM 4475  O   HOH S 129      80.058  40.479  24.663  1.00 51.65           O
HETATM 4476  O   HOH S 130      59.382  33.145  29.950  1.00 54.27           O
HETATM 4477  O   HOH S 131      62.386  17.675  31.260  1.00 44.17           O
HETATM 4478  O   HOH S 132      40.993  34.547  43.686  1.00 33.69           O
HETATM 4479  O   HOH S 133      72.860  47.109  47.796  1.00 31.51           O
HETATM 4480  O   HOH S 134      58.520  14.155  42.430  1.00 34.88           O
HETATM 4481  O   HOH S 135      74.566  44.942  49.391  1.00 40.87           O
HETATM 4482  O   HOH S 136      63.938  11.658  45.987  1.00 42.10           O
HETATM 4483  O   HOH S 137      73.092  44.898  47.735  1.00 40.36           O
HETATM 4484  O   HOH S 138      58.128  43.558  50.660  1.00 35.58           O
HETATM 4485  O   HOH S 139      73.344  36.501  24.145  1.00 44.14           O
HETATM 4486  O   HOH S 140      59.108  14.606  55.368  1.00 52.32           O
HETATM 4487  O   HOH S 141      60.897  61.687  42.603  1.00 64.45           O
HETATM 4488  O   HOH S 142      63.980  36.833  44.232  1.00 35.96           O
HETATM 4489  O   HOH S 143      77.018   2.445  42.780  1.00 57.04           O
HETATM 4490  O   HOH S 144      67.557  16.998  30.606  1.00 46.89           O
HETATM 4491  O   HOH S 145      66.180   8.415  44.535  1.00 49.37           O
HETATM 4492  O   HOH S 146      91.591  25.707  51.654  1.00 46.06           O
HETATM 4493  O   HOH S 147      55.987  14.042  48.946  1.00 45.65           O
HETATM 4494  O   HOH S 148      41.047  34.951  49.197  1.00 43.07           O
HETATM 4495  O   HOH S 149      84.670  45.411  42.400  1.00 50.45           O
HETATM 4496  O   HOH S 150      38.281  30.086  44.760  1.00 38.35           O
HETATM 4497  O   HOH S 151      50.537  29.347  29.053  1.00 57.58           O
HETATM 4498  O   HOH S 152      88.789  30.162  36.696  1.00 33.91           O
HETATM 4499  O   HOH S 153      67.373  39.515  35.923  1.00 43.44           O
HETATM 4500  O   HOH S 154      74.199  35.376  55.995  1.00 60.36           O
HETATM 4501  O   HOH S 155      48.908  19.588  49.070  1.00 45.45           O
HETATM 4502  O   HOH S 156      59.748  31.607  53.470  1.00 45.78           O
HETATM 4503  O   HOH S 157      75.838  51.255  53.499  1.00 51.24           O
HETATM 4504  O   HOH S 158      51.550  10.455  41.594  1.00 53.99           O
HETATM 4505  O   HOH S 159      79.093  25.573  47.800  1.00 54.31           O
HETATM 4506  O   HOH S 160      44.603  44.752  54.861  1.00 47.35           O
HETATM 4507  O   HOH S 161      58.356  59.055  35.031  1.00 55.46           O
HETATM 4508  O   HOH S 162      56.853  15.384  53.589  1.00 57.10           O
HETATM 4509  O   HOH S 163      69.519   3.352  44.805  1.00 57.54           O
HETATM 4510  O   HOH S 164      72.553   7.365  44.051  1.00 53.03           O
HETATM 4511  O   HOH S 165      87.634   0.452  46.386  1.00 63.91           O
HETATM 4512  O   HOH S 166      53.657  47.730  45.637  1.00 45.56           O
HETATM 4513  O   HOH S 167      40.925  42.952  36.742  1.00 44.58           O
HETATM 4514  O   HOH S 168      53.314  53.260  44.715  1.00 52.90           O
HETATM 4515  O   HOH S 169      60.635  41.879  31.108  1.00 48.57           O
HETATM 4516  O   HOH S 170      79.714  51.860  47.193  1.00 46.80           O
HETATM 4517  O   HOH S 171      48.763  18.210  46.184  1.00 47.88           O
HETATM 4518  O   HOH S 172      56.454  30.343  28.794  1.00 59.94           O
HETATM 4519  O   HOH S 173      80.930  47.993  49.270  1.00 45.77           O
HETATM 4520  O   HOH S 174      76.257  35.157  56.833  1.00 67.04           O
HETATM 4521  O   HOH S 175      53.077  25.402  31.874  1.00 44.12           O
HETATM 4522  O   HOH S 176      49.662  43.364  48.309  1.00 44.75           O
HETATM 4523  O   HOH S 177      41.071  42.291  31.865  1.00 48.82           O
HETATM 4524  O   HOH S 178      77.439  25.946  48.631  1.00 53.43           O
HETATM 4525  O   HOH S 179      83.697  24.877  51.134  1.00 58.30           O
HETATM 4526  O   HOH S 180      84.087  27.145  53.993  1.00 50.78           O
HETATM 4527  O   HOH S 181      81.151  23.796  52.974  1.00 60.49           O
HETATM 4528  O   HOH S 182      86.513  20.459  51.740  1.00 63.47           O
HETATM 4529  O   HOH S 183      77.884  19.894  33.628  1.00 36.79           O
HETATM 4530  O   HOH S 184      90.582   2.013  38.592  1.00 69.47           O
HETATM 4531  O   HOH S 185      67.836  39.965  53.218  1.00 33.58           O
HETATM 4532  O   HOH S 186      67.978  40.960  54.927  1.00 45.79           O
HETATM 4533  O   HOH S 187      46.263  44.639  43.557  1.00 52.72           O
HETATM 4534  O   HOH S 188      72.319  57.578  35.156  1.00 52.83           O
HETATM 4535  O   HOH S 189      62.445  40.404  42.157  1.00 36.17           O
HETATM 4536  O   HOH S 190      60.822  39.690  41.020  1.00 46.98           O
HETATM 4537  O   HOH S 191      44.465  47.858  34.028  1.00 51.23           O
HETATM 4538  O   HOH S 192      77.000  27.385  18.874  1.00 56.79           O
HETATM 4539  O   HOH S 193      81.765   5.592  29.510  1.00 52.83           O
HETATM 4540  O   HOH S 194      76.120  55.392  35.962  1.00 51.98           O
HETATM 4541  O   HOH S 195      99.861  34.741  55.956  1.00 49.14           O
HETATM 4542  O   HOH S 196      94.688  28.445  40.946  1.00 47.02           O
HETATM 4543  O   HOH S 197      99.124  28.272  45.480  1.00 53.86           O
HETATM 4544  O   HOH S 198      52.736  46.346  49.909  1.00 44.31           O
HETATM 4545  O   HOH S 199      73.232  45.221  52.325  1.00 36.90           O
HETATM 4546  O   HOH S 200      95.860  28.594  43.742  1.00 42.14           O
HETATM 4547  O   HOH S 201      48.501  16.214  38.667  1.00 54.33           O
HETATM 4548  O   HOH S 202      74.372  53.179  37.904  1.00 44.47           O
HETATM 4549  O   HOH S 203      76.821  36.090  23.187  1.00 51.43           O
HETATM 4550  O   HOH S 204      74.723  48.978  54.650  1.00 49.68           O
HETATM 4551  O   HOH S 205      51.057  58.398  40.190  1.00 51.23           O
HETATM 4552  O   HOH S 206      52.765  21.242  34.077  1.00 44.29           O
HETATM 4553  O   HOH S 207      62.647  43.975  65.547  1.00 54.58           O
HETATM 4554  O   HOH S 208      68.933  40.518  56.567  1.00 64.85           O
HETATM 4555  O   HOH S 209      78.312  56.531  36.618  1.00 68.80           O
HETATM 4556  O   HOH S 210      93.167  36.403  44.019  1.00 44.67           O
HETATM 4557  O   HOH S 211      82.116  21.946  55.538  1.00 62.25           O
HETATM 4558  O   HOH S 212      74.303  47.472  52.374  1.00 43.41           O
HETATM 4559  O   HOH S 213      87.621   0.392  49.287  1.00 60.31           O
HETATM 4560  O   HOH S 214      60.236  65.486  50.964  1.00 54.31           O
HETATM 4561  O   HOH S 215      71.312  64.056  48.041  1.00 51.21           O
HETATM 4562  O   HOH S 216      65.347  27.025  26.491  1.00 47.33           O
HETATM 4563  O   HOH S 217      74.576  57.351  33.805  1.00 50.33           O
HETATM 4564  O   HOH S 218      80.573  43.761  30.103  1.00 43.89           O
HETATM 4565  O   HOH S 219      80.981  44.208  57.851  1.00 52.77           O
HETATM 4566  O   HOH S 220      66.281  28.839  26.164  1.00 54.98           O
HETATM 4567  O   HOH S 221      68.962  11.601  48.407  1.00 59.48           O
HETATM 4568  O   HOH S 222      81.466  41.342  31.030  1.00 44.24           O
HETATM 4569  O   HOH S 223      65.900  30.768  53.877  1.00 46.77           O
HETATM 4570  O   HOH S 224      83.216  41.141  42.881  1.00 41.22           O
HETATM 4571  O   HOH S 225      61.442  35.189  35.842  1.00 50.72           O
HETATM 4572  O   HOH S 226      37.964  35.310  35.552  1.00 47.80           O
HETATM 4573  O   HOH S 227      73.363  49.377  56.372  1.00 53.30           O
HETATM 4574  O   HOH S 228      65.804  53.013  26.671  1.00 55.61           O
HETATM 4575  O   HOH S 229      59.335  36.532  43.303  1.00 50.49           O
HETATM 4576  O   HOH S 230      72.224  34.196  22.507  1.00 63.12           O
HETATM 4577  O   HOH S 231      54.052  35.456  58.118  1.00 51.46           O
HETATM 4578  O   HOH S 232      56.957  36.416  28.163  1.00 48.22           O
HETATM 4579  O   HOH S 233      37.985  41.051  46.138  1.00 54.65           O
HETATM 4580  O   HOH S 234      95.917  19.934  40.773  1.00 47.50           O
HETATM 4581  O   HOH S 235      61.536  40.335  61.156  1.00 42.59           O
HETATM 4582  O   HOH S 236      69.978  51.767  30.773  1.00 54.72           O
HETATM 4583  O   HOH S 237      90.744  16.627  53.173  1.00 58.14           O
HETATM 4584  O   HOH S 238      64.954  42.895  30.892  1.00 63.90           O
HETATM 4585  O   HOH S 239      87.923  29.258  31.539  1.00 48.78           O
HETATM 4586  O   HOH S 240      97.456  22.602  40.114  1.00 56.31           O
HETATM 4587  O   HOH S 241      48.695  53.420  30.717  1.00 60.58           O
HETATM 4588  O   HOH S 242      89.282  18.997  49.524  1.00 52.79           O
HETATM 4589  O   HOH S 243      65.823  36.513  32.461  1.00 51.99           O
HETATM 4590  O   HOH S 244      50.983  59.999  37.517  1.00 51.26           O
HETATM 4591  O   HOH S 245      47.621  21.832  50.373  1.00 55.67           O
HETATM 4592  O   HOH S 246      73.282  61.159  49.909  1.00 53.81           O
HETATM 4593  O   HOH S 247      66.404  11.513  33.281  1.00 55.53           O
HETATM 4594  O   HOH S 248      99.377  38.444  49.699  1.00 51.91           O
HETATM 4595  O   HOH S 249      79.234  22.224  46.983  1.00 60.09           O
HETATM 4596  O   HOH S 250      64.015  23.202  24.732  1.00 59.63           O
HETATM 4597  O   HOH S 251      65.176  37.190  29.867  1.00 65.76           O
TER
END
